# Supplementary material for: Individual Pride and Collective Pride: Differences Between Chinese and American Corpora
Source: Front Psychol. 2021 May 19;12:513779. doi: 10.3389/fpsyg.2021.513779 (PMC8170025; doi:10.3389/fpsyg.2021.513779)
Supplement: Supplementary file 1 [file Data_Sheet_1.XLSX]

## Sheet: COCA-Blogs
seq	evaluator(1: first pair; 2: second pair)	content	A	B	final		0: Non-pride
1	2	to make sure this bill is signed into law. " # " I am proud to co-author this legislation with my friend (Rep.) Cathy McMorris Rodgers, which	0	1	1		1: Individual pride
2	2	of us had to learn pride. We were all born with it. # Pride is the doorway that leads to all other sins. Every sin begins with pride	0	4	4		2: Relational pride
3	2	functionary of a ruling class. The human spirit needs work and challenges to create pride and dignity, not coddling and condescension. And if it does not get what	0	4	4		3: National pride
4	2	doing so used insulting terminology. # Now it appears to be an issue of pride. Pride is not something God likes or approves of. Many fellow Christians have	0	4	4		4: General pride
5	2	relation with everyone is a must in life. Run from prejudice, anger, pride, bitterness, and unforgiveness. # Green Pastures - Growing in Christ means you	0	4	4
6	2	they are normal,. they are getting rid of their " colors " and pride, burning their rainbow flags and trashing their stupid gay pride day and parades and	1	0	0
7	2	mom started seeing me &; my brother in him. Now again he is the proud owner of my bed, pillow &; blanket. May be that's why people	1	0	0
8	2	volunteers with resources to the families who need them. # So Mobile Commons is proud to partner with OccupySMS. They're using mobile technology to connect people in need	1	0	1
9	2	a teacher's salary for one year, and this is something we are very proud of being a part of. We	1	2	1
10	2	(also Philadelphia) The Republicans have to be tougher in Washington -- I am proud of Governor Kasich for standing for principles of fiscal responsibility and smaller government. I	1	2	2
11	2	of the saddness and lonliness disipates for a few minutes. Ive never been more proud of someone in my life then I am of my hubs for the work he	1	2	2
12	2	outcome of feminism for our generation has been great for young women and I'm proud to see those accomplishments. However, I think the outcome has been lacking in	1	2	2
13	2	) be better off for it in the long run. # (Source -- Proud father of 2 beautiful girls and one handsome as hell little boy) # Every	1	2	2
14	2	a sense of compassion and adoration for this wonderful country. They spoke with a pride that only they could have acquired through their experience as a US Marine. There	1	3	1
15	2	, those soldiers are standing their posts. You can't feel anything else but pride # Some folks don't understand the concept these people stand for. and what	1	3	3
16	2	communist talk, and walks the capitalist walk ". # Nonetheless, if every proud American were to move to the heartland, I'm sure the remaining lands could	1	3	3
17	2	of screen time. I also bet that the Reagans are rude-- or worse--to this proud man of color. Would a publisher	1	3	1
18	2	what is going on. The Muslimization of Europe. I am a moderate and proud of it but also frightened for my country. The Decline and Fall of the	1	3	1
19	2	Of course I do my very best to get the answers right, out of pride and caution, but it doesn't actually matter. # Why? # Because	1	4	4
20	2	to kill other men in the name of god, or duty, or national pride or pure greed. # Because um, did Hitler actually kill anyone? I	1	4	3
21	2	right, it is the small landlord that is going to face onerous regulation. Pride goeth and all that. This is a serial collapse and those now standing tall	1	4	4
22	2	unthinkable a few decades ago.) # This generation was less hung-up about Bengali pride. Even more importantly, influenced by the predominantly nationalistic narrative of popular media,	1	3	3
23	2	to recognize your ignorance, consequently being forever trapped in a positive feedback loop of pride, and self righteous indignation. I really didn't mean this reply to be	1	4	4
24	2	then i found her success repulsive. I feel it is driven by narcism and pride. What was a happy thing for me had now become something i despise.	1	4	4
25	2	standardized than butt/thigh sizes. # I do not appreciate the celebrity " size 8 pride, " since to me it's like they're saying, " I am	1	4	4
26	2	walking takes on one's feet. The blisters and sores become a point of pride, a source of camaraderie on the trail: we're all suffering together.	1	4	4
27	2	time when most humans did this sort of work- well-made, thought-out, crafted with pride, skill and dignity, products to USE, and to do otherwise was considered	1	4	4
28	2	our credit intact, mortgage paid off, no guilt, but definitely some trampled pride. # #47 Jordan 9:32 am July 22nd, 2008 # I agree with	1	4	4
29	2	to be an American. Proud of the ideal, proud of the concept, proud of the promise. That hasn't been easy lately, but I have come	1	4	1
30	2	front door... Just look for the back one. # As such WeedMaps is proud present Bud Trimmer: a kushy new action game filled with sparkly, crunchy and	1	4	4
31	2	that he could shoot some fish in a barrel, that's all.Nothing to be proud of. # tmac, I think you might be misunderstanding my motivation for posting	1	4	1
32	2	of her " win. " in Texas. # This is nothing to be proud of. It took ten years to develop the moment when we could have exited	1	4	4
33	2	with tinted windows and streaming ribbons stretches along the highway. Drum music accompanies the proud procession; gun-shot salutes ring out, calling neighbors to join the happy event.	1	4	4
34	2	me not only reach 100,000 views but turn this blog into something to be damn proud of, I knew I needed to throw back some of that love. Here	1	4	4
35	2	? Share: 14 Comments For This Post # There are millions of proud and noble " savages " such as these. The real barbarians are those who	1	4	4
36	2	with time as it passes, so in 2011 make every day one to be proud of, " Peter Clarke 2011. # " Money left in the hands of	1	4	4
37	2	the jahova witnesses the other rap artists.hahah really.. last week they had the gay pride people in drag and the bikers in tatoos and leather.. # 5 months ago	2	0	0
38	2	" Bergfeld said. " If Penn State is a place where you would be proud to have a degree from, and you would have contacts and the educational experience	2	0	2
39	2	if Hitler was to see what Israel was doing to the Palestinians he would be proud whilst at the same time gobsmacked as to how Israel is treating Palestinians the same	2	0	2
40	2	do a basic regression analysis, you give me a blank stare. # You pride yourself on being connected. Well... connect. See what's out there.	2	1	1
41	2	differences as I may have with this president, I do feel a sense of pride for me, and my children, and my grandchildren! So the whole concept	2	1	1
42	2	president of all the people as he has done. He also needs to take pride in the barbs that he is the food stamp president because he STOOD UP for	2	1	1
43	2	Enough? " today, a Facebook-based contest that allows Northwesterners to show their team pride while also learning how to make more efficient choices when shopping for televisions. #	2	1	2
44	2	that she will not meet with you. The council is clearly putting their own pride first and standing up for themselves over standing up for the rights of the people	2	1	1
45	2	your own history. If your mom is Hungarian than you are too. Be proud of your heritage. I thank you for sharing. # frank I personally do	2	1	2
46	2	. Zynga is made up of incredible talent and dedicated leaders, and I am proud to have joined the team. " # This last sentence bothers me as well	2	1	2
47	2	freely elect an African American to our nation's highest office. I am still proud of the fact we did that! In so many ways, peoples of others	2	1	1
48	2	most of my adult life, made a good living at it, and am proud of the work we did. Our agency was Hodskins Simone &; Searls. It	2	1	1
49	2	along with the entire NFL viewership, will be laughing when they spy the once proud Pittsburgh Steelers being pushed onto Heinz Field by a management team (what were they	2	1	1
50	2	laughing stock of the rest of the democratic world. # You should not be proud, you ought to be ashamed of yourself, especially because of your religious extremism	2	1	1
51	2	a building that is adequate for athletic programs -- a building that we can be proud of. This, indeed, is a day to celebrate. " # Bauer	2	1	2
52	2	out of the Jim Crow South. I am a lover of Israel, a proud Zionist, but I am covered in shame. This, from Jews? From	2	1	3
53	2	he visited that night knew what he was doing, Moore said he was still proud of what he was representing. # " He put on a white shirt and	2	1	1
54	2	lesbian athletes are part of the community of people making their voices heard and being proud. # The perception is that few athletes are out and this owes to none	2	1	1
55	2	Teheran just can't stop talking about killing Jews. They love it and are proud of it. Israel keeps warning there is no way they are going to stand	2	1	1
56	2	yours. Nobody is strong enough to stop you. # Some people will be proud of the outcome, and some people will be ashamed of it. # Interesting	2	1	1
57	2	Light has decided to consolidate their business with another roster agency. I am very proud of the work we've done for this American icon, including our much beloved	2	1	1
58	2	at Anderson Bulldogges. While Luke's accomplishments are certainly noteworthy and something to be proud of, I am most proud of the companion that I have in him.	2	1	2
59	2	the staff at our new company, we built a business together we were very proud of. " # Around the time of his retirement, Hayes " was as	2	1	2
60	2	am not sure if anyone else has seen this but this team should be very proud of only turning the ball over 10 times this season. This puts us in	2	1	1
61	2	's kind of a hard fold; good job! " It's ridiculous how proud I was of that bunny when I finished it. And of my daughter.	2	1	2
62	2	the menu, bubble tea makes up 80-90 percent of our sales and Taiwanese are proud of this home-grown drink, " says Lin. # Today, bubble tea shops	2	1	2
63	2	Your 6-year-old asking them to stop fighting at Christmas is priceless! (What a proud moment for you.) Hope it stopped them in their tracks for a while	2	1	1
64	2	understand these key principles: # Your product is your message: hopefully you are proud of what you market and feel it has value over the competition, as it	2	1	2
65	2	and honestly " in the military. # The one that said " I'm proud of what we've done. If Massachusetts succeeds in implementing Romneycare, then that	2	1	2
66	2	digit lead. 25-25 can't be good enough for A &M,; and I'm proud we made a tough choice to let a great man go to show that A	2	1	2
67	2	offices. # No matter how the vote comes in on Tuesday, I'm proud of the effort by our little scruffy group and all of the REAL Americans I	2	1	2
68	2	chance to continue to go from strength to strength. # " I am very proud of what we have achieved at the BOA over the past seven years and I	2	1	2
69	2	for' local' sharing their passion and finds with you. I'm extremely proud of what we've created, together, but I don't want to just	2	1	1
70	2	; it's an ugly and deadly business that yields little to celebrate. Be proud of what we did in WWII, but never think of war as the first	2	1	1
71	2	receiver in bankruptcy, the bad guys get away. This is one of the proud legacies of President George W. Bush and the Republican Congress, BTW. # So	2	1	1
72	2	. This was a tone-deaf school board, pickled in their own ignorance, and proud of it -- as only Texas right wingers can be. # All this is	2	1	1
73	2	feather " logo items all over the world. Everyone seemed to wear it with pride. I look at it as a great association with what the Ute Indian tribe	2	3	2
74	2	nationalism, and the sense that we should have a collective culture, a collective pride, a consensus on anything big or small, will go with it. If	2	3	3
75	2	liberals place the emphasis on government. There is an accepted arrogance and unhealthy pride about conservatism in America that strives to place this nation above all the nations in	2	3	3
76	2	be an American and be there for his country. How could I not feel proud. " # On Sunday night, a national Memorial Day concert called " A	2	3	3
77	2	every day for keeping him safe, and for bringing him home. I am proud of them all, and proud to be an American. # To the American	2	3	3
78	2	Well, I think when you have somebody of your own race that you're proud of being president of the United States, I applaud Colin for standing with him	2	3	3
79	2	one championship. That is a vital part of UK history that we all were proud of at the end of the 96-97 season. I don't see any reason	2	3	3
80	2	jobs in America. # The Volt is something that all Americans should be really proud of. If many Americans will buy this practical gas saving job creating vehicle,	2	3	3
81	2	whole may take, on grounds of religion and race, an interest and a pride. But in order that this community should have the best prospect of free development	2	4	4
82	2	to recognize LGBT pride month this year and allow some servicemembers to participate in LGBT pride events in uniform. Because of current law, military families headed by same-sex partners	2	4	0
83	2	excellence recognized by society, his right to pride. " While the claim to pride for a Victorian gentleman rested on moral virtues rather than physical prowess, the process	2	1	1
84	2	forbidden, but is viewed as an automatic disparagement of non-whites. A' White Pride' T-shirt is deemed a threatening symbol, whereas a' Black Supremacy' slogan	3	0	0
85	2	me, all of us fulfilling our civic responsibility, and I feel proud. Proud of us, proud of my country. I also feel blessed, because I	3	3	3
86	2	as they watch you from such a close proximity. There is a sense of pride and a gentle spirit that you can feel from the Tanzanian people that is unlike	3	2	4
87	2	venting on this rich white foreigner, suddenly makes you have some misplaced' American pride'. But if tomorrow another Black maid gets raped say, by her White	3	4	3
88	2	I feel really sorry for all of you that are just " expressing their white pride " what did you ever do that you shoud be proud of? small pox	3	4	4
89	2	no time castigating that black person, not rationalizing his racist behavior. # White pride, as well as black pride or any other ethnic pride is for people who	3	4	4
90	2	street fighter game taking on Chun Li. 8 is the national banner for Gay Pride. # this is fantastic foxy! those images are so random, but i	4	0	0
91	2	suggesting that if one of the Disney theme parks was going to have " gay pride " parade at which NAMBLA -- look it up -- was going to have a	4	0	0
92	2	# MrTobikuma # No, don't be ignorant -- the song is about gay pride &; self-love within all people, it just doubles as an song which promotes Illuminati	4	0	0
93	2	posters? How about the young pastor who was giving out bibles during the gay pride parade - the police had to intervene because the crowd that gathered around him was	4	0	0
94	2	the bankers. Getting $50 abortions paid for under MIttcare and signing off on Gay Pride Days in public school are noble and classy? Not in my universe. #	4	0	0
95	2	**29;38400;TOOLONG... target= " hplink " >reportedly the headline performer</a> at Oklahoma City's gay pride in 2006. Cyndi Lauper &; Ellen Lauper # The pop diva is more	4	0	0
96	2	we look at Gomi's memorable performances starting with Gomi vs. Tatsuya Kawajiri at Pride Bushido 9. # Takanori Gomi has come to be known as a sloppy,	4	0	0
97	2	-- and see how it won. The first ever attempt to hold a Gay Pride rally in Trafalgar Square was in 1965. Two dozen people turned up -- and	4	0	0
98	2	same-sex spouse, the first-ever sanctioned participation of uniformed, active-duty soldiers in a Gay Pride parade and the first-ever openly gay general in the military's history have all happened	4	0	0
99	2	years from now, they will stop the traffic in Central London for a Gay Pride parade on this very spot, and it will be attended by hundreds of thousands	4	0	0
100	2	the future. # Published in 1956, in this week's book, " Proud Shoes, " Pauli Murray tells the story of her grandfather Fitzgerald, that takes	4	0	0
101	2	of the sexual diversity movement call " heteronormativity ". Training for teachers in the Proud Schools scheme advises them to " focus on the dominance of heterosexism rather than on	4	0	0
102	2	have value even when I'm not involved in the transaction. If it is pride - well, fine. I can definitely live with that. # The same	4	1	4
103	2	are liars or, more commonly, have believed liars.) # In their pride, they empowered the northern capitalists, which Lincoln was to the core, to	4	1	4
104	2	and center in the pride parade wearing a hyper-sexualized outfit and shouting loudly about how proud they are of their sexuality? Often, this is their way of rebelling against	4	1	1
105	2	with a win. Cowboys 21, Bears 20 # vs. # Make Us Proud, Weeden &; T-Rich: The full game prediction can be found here. I	4	1	4
106	2	there and whoever is helping out is down there. It does make you feel proud. And it is something to be proud of, I think, to come	4	1	4
107	2	on it... get off your high horse. # Mike # it's called pride in your school. you don't have it. Rock Chalk # Dagger108 #	4	2	4
108	2	in northern Norway. " It is like meeting long-lost family. I am a proud member of 3160323	4	2	2
109	2	would've been if he hadn't been at the wheel. America, be proud. # Back to my point. It's when I got to the propositions	4	3	3
110	2	virus when your slow enquiry matches the version for a used folder. A common pride of this is if you're above that your customer, practice or spell might	0	0	0
111	2	Revelle, all of which supports San Diego service providers and businesses. We are proud to be able to help recognize the extraordinary regional significance of Scripps and its fleet	0	0	0
112	2	residents and business leaders have talked about for 20 years. Today, I'm proud to give you a small preview of this building. Even before the doors open	0	0	0
113	2	Red Tape has dedicated this season to the idea of Empires Collapsing. We are proud to present the work of Caryl Churchill, Ruth Margraff, and Young Jean Lee	0	0	0
114	2	. And I was one who benifited from the younger teacher. # I am proud to have been your collaborator and I appreciate the reminder about how our play was	0	0	0
115	2	Living magazine in their September issue: # Starting this holiday season, we are proud to announce a partnership with Belk, a Charlotte-based, family-owned department store with over	0	0	0
116	2	1980s with classic horror novels like The Kill and Dead White -- and we were proud to be working with him on several projects. The two completed books have arrived	0	0	0
117	2	him. But rather than show that he'll buck politics in order to stand proud with his wife, he cowers and runs away, embarrassed and ashamed of the	0	0	0
118	2	to go broke!!! # I'm the wife of FastDonzi and very proud new owner of the M &P; 9mm full size. Awesome gun, love it	0	0	0
119	2	social media, journalism and television production, " said Brown. " I am proud to be associated with the strong team within the new school and with an administration	0	0	0
120	2	Merrimack Valley 2, Plymouth 1 # Meredith Ramsey scored the winning goal for the Pride (7-7) in the 65th minute, finishing at the near post after controlling	0	0	0
121	2	is to kill the way it used to give bare-metal nothing-but-the-title works with 4 copies pride of place. It can't fix the problem of only one search result generally	0	0	0
122	2	Drake's, Home Pride, Ho Hos, Hostess, Merita, Nature's Pride, and of course Wonder Bread and Twinkies, and which previously survived one multi-year	0	0	0
123	2	are needed to keep their bodies injury free and healthy. # The USSSA Florida Pride is a professional franchise in the National Pro Fastpitch League that is owned and operated	0	0	0
124	2	. # There were cathartic tears of joy due to the Mormon presence in SLC Pride, but I also think there's a risk that a gay Mormon youth somewhere	0	0	0
125	2	out chuck lidell twice. # Triggerman99 # Anderson Silva is no more a former Pride fighter than he is a former Cage Rage fighter. He fought 4 times between	0	0	0
126	2	to interpret their surroundings. In normal times The Nature Of Inspiration would get a pride of place showing on the Nature Of Things. But these are not normal times	0	0	0
127	2	sentimental ballads and bright hooks made him the most successful African-American country singer since Charley Pride. Rucker amps up that formula on album number two. " The debut in	0	0	0
128	2	a student presentation to University President John J. DeGioia along with other representatives from GU Pride, College Democrats, Georgetown Solidarity Committee and Take Back the Night. # "	0	0	0
129	2	, but over much of the South. As a result, small game held pride of place, and bird hunting, along with that for squirrels and rabbits,	0	0	0
130	2	weird. I'm ok with that.) Most of all, a very proud 3210715 # While the	0	0	0
131	2	but I also traveled and the ones who are like this mostly are pushy republican PROUD southerners. (Born ins America.. Southern by the grace of God) that	0	0	0
132	2	any slanders and slurs against Sarah Palin and other Republican and Conservative women? # PROUD RINO # Talk Radio in LA (with the exception of Geraldo River and Michael	0	0	0
133	2	3191985 Post navigation Proud to be a part of this -- 61 Tips on mLearning: Making Learning Mobile	0	0	0
134	2	previously described. Observation will show that the top land of the cylinder liner is proud of the top of the cylinder case by approximately 0-010 in. (0-254 mm.)	0	0	0
135	2	, New York. Thayer came to accept the popularity of his poem and took pride in his authorship. In 1935 he attended the 50th anniversary of his Harvard class	1	1	1
136	2	circa 405) was the Prefect of Gaul under Valentinian III; he recalls with pride being present with his father at the installation of Astyrius as consul for the year	1	1	1
137	2	bragging rights, the players in these games earn something deeper: a sense of pride in their identity as strangers in a strange land. # Since their inception two	1	1	1
138	2	sports history and culture, with basketball, football, and racing as a true pride of the city. The widely successful Indianapolis Colts have put Indianapolis on the map	1	1	1
139	2	now that you've seen this. # Of course, Hayden and Jenna's pride and joy is the map of Equestria that Mama got for them at Walmart.	1	1	1
140	2	. I can't even talk about where I graduated from with any sense of pride anymore. Each interview I've been to in the past year (all 3	1	1	1
141	2	3176803 Wellstream, proud to be a part of GE Oil &; Gas # Wellstream is a leading designer	1	1	1
142	2	that I stand with you. I'm proud to represent you. I'm proud to stand with coal. And I will continue to relentlessly fight against President Obama	1	1	1
143	2	taking this way OT, you could say Michigan fans and alumni, a supremely proud and successful college football program (and some would argue in that order),	1	1	1
144	2	America's Battalion) I am proud of my service and make no excusses. Proud of those who served, serving and will ware the uniform of our nation in	1	1	1
145	2	to describe her grocery store as " hometown proud. " # " We are proud of what we have provided for the community, and we are here for the	1	1	1
146	2	, Hasner is proud of his friendship with Geller. Geller, too, is proud: she wrote yesterday on her blog that she " enthusiastically supports " Hasner.	1	1	1
147	2	if that is what they mean by a' Liberal', then I'm proud to say I'm a Liberal. " # -John Kennedy Any Other Questions	1	1	1
148	2	Don't criticize the other party without acknowledging your own corruptions. # I am proud to be female Republican (of the Libertarian-sense) because I actually understand it.	1	1	1
149	2	Eddy Cue via Ferrari's official website mentions: # " I am pleased and proud to become a member of the board. I have personally dreamed of owning a	1	1	1
150	2	his healthcare law in MA, which I honestly think in his gut he's proud of despite Obamacare's unpopularity, and I think that hurt him because he had	1	1	1
151	2	like they'll never have to face the consequences for their actions. I'm proud that all us FJLs came together to make at least one of these behemoth corporations	1	1	1
152	2	AGAIN, EXACTLY WHERE AS A TAX PAYING CITIZEN WHO CAN PROVE MY BIRTHPLACE AND PROUD OF IT FIND THIS BILL TO ACTUALLY READ IT. I HAVE A GROUP OF	1	1	1
153	2	this song because it's an AB song. Needles to say... I'm proud of being a member and occasionally cyber soldier of AB Nation. # This is	1	1	1
154	2	into their mislabeling and false advertising. # Please help spread the word. # Proud Citizen said, # on January 9th, 2011 at 7:18 pm # This is	1	1	1
155	2	campus to begin an intensive three-day evaluation of our school. Poughkeepsie Day School is proud to be a member of NYSAIS (New York State Association of Independent Schools)	1	1	1
156	2	all I'll say is thank you for doing this remarkable show. I feel proud to 3157879 # Airline	1	1	1
157	2	and build it back up again. So I did, and now I am proud to say that we have 40 members, most of whom come to each meeting	1	1	1
158	2	scoot to the drawer and I lifted the receipt / warranty aloft with all the pride of an Olympic Gold Medallist, punching my fist skywards. I may even have	1	1	1
159	2	SAHM to a SuperToddler. Book blogger. Compulsive reader/researcher. Armchair Egyptologist. Blissfully proud Geek. Oh, I also have an MA in linguistics, and am obsessed	1	1	1
160	2	, and so orders him to " Go to Australia and make an old man proud ". Australia, at the time, was of course at the height of	1	1	1
161	2	selected to be a part of such a landmark study adds to Centrumr multivitamins' proud heritage of being the most-studied, the most-recommended, and the most-used multivitamin brand in	1	1	1
162	2	3195168 # " I'm very proud to say that I'm a New York Jet... and I will be forever	1	1	1
163	2	an unsuspecting world. She is second generation Polish, very European, beautiful, proud and very Catholic. Believe me when I say that I am the very acme	1	1	1
164	2	got me to places where I want to be, but I just take such pride in having the name. It's a blessing for sure. " # Unfortunately	1	1	1
165	2	n't pass the muster as a citable source. # " Would it hurt your pride to be " forced " to let someone else speak for you? " #	1	1	1
166	2	lacking in pride and integrity. # I can not speak to Paul Simon's pride or integrity, I do not know the man. # I can only speak	1	1	1
167	2	outside of the States for years now, but that has only grown my Chiefs Pride. I am a journalist by trade and a Chief by blood. Born and	1	1	1
168	2	# The chef delivers the steak of all steaks to your table, beaming with pride, and before he walks away you dump half a bottle of Tabasco or ketchup	1	1	1
169	2	's okay... no nappers were harmed in this photo session, except a little pride while we laughed. 6 comments: # That is to funny! Having	1	1	1
170	2	and with few noticable side-effects. A bias against meds suggests the same kind of pride that keeps men from seeking treatment in the first place. # Though I have	1	1	1
171	2	should have to prove they respect &; can take care of their own property with pride, which she definitely knows nothing about. It they are not already, which	1	1	1
172	2	even the stiffest upper lip. # This is not to excuse Samir Nasri trading pride for a paycheck. This is not to excuse Cesc Fabregas' virtual boycott of	1	1	1
173	2	again, I can always put forward my fiddly bits as a source of " pride ", as well as my ethnicity too! " Not just a skeptic!	1	1	1
174	2	images, fantasizing), anger (also resentment, irritation, jealousy) and pride (your sense of self, attachment to an identity as the Doer of things	1	1	1
175	2	community who drew the map. Putting their to their work inculcates a sense of pride. Image by Rema Nagarajan. Brazil, 2012. # The village square of	1	1	1
176	2	of us 3198452 Pride at Work puts " Boots on the Ground " # CLEVELAND, Ohio - Some	1	1	1
177	2	it so as to puff your little chest with' capitalistic' wealth adoring complicit pride -- just like Moody's that uses the same scam. But have no doubt	1	1	1
178	2	, giving him our hearts by accepting His plan and moving on, cleared the pride from our eyes and showed us what really matters. # What really matters is	1	1	1
179	2	to love and to give live; in us, on the other hand, pride is deeply rooted and requires constant vigilance and purification. We, who are little	1	1	1
180	2	It's a shame that cowardly Fedor didn't want to enter the UFC after Pride collapsed. Fedor and his manager claim that contract negotiations didn't go their way	1	1	1
181	2	'd like us to be the majority. I'd like to build Columbus Urban Pride and continue to build and support opening and affirming places of faith. But most	1	1	1
182	2	this world. Pray that God may give you the strength so that hope and pride may always reign in your heart and life because you are God's children and	1	1	1
183	2	my house. # If you are going to fight, do it with some pride at least. I may be tiny materially, but in words, I am	1	1	1
184	2	spelling. I know some errors still get by, but geez -- have some pride. # I'm with you. You should put effort in your writing especially	1	1	1
185	2	. Many grimy guys like to tinker with cars, and their wheels are their pride and joy. After he gets done working under the hood, he wants to	1	1	1
186	2	believe what got injured most in the above clip is this " master's " pride and reputation among his students!) # Bottom line... avoid McDojos. They	1	1	1
187	2	that lump in your throat and that swelling in your heart -- it's called pride and honor. God bless you anyway. # Lydia, I served 3 tours	1	1	1
188	2	comment, but hell yeah to being a small business owner! Nothing like the pride of directly seeing your own efforts directly improving your own life with no one skimming	1	1	1
189	2	? " # And if you can see yourself as **blameless: ** Is that pride? And no longer without fault? Oy Vey! # If there are those	1	1	1
190	2	one man and much, much more about defending a nation. Akins must set pride and self-righteousness for the greater good. He will have another chance to serve down	1	1	1
191	2	working as such an evil organization. # Anonymous # How could ANYONE have any pride if they work for Fox News? Maybe if they were also in the Klan	1	1	1
192	2	to be labeled by others, and by choosing our label as a source of Pride, we move the world forward to that day when everyone has the same rights	1	1	1
193	2	robust and meaningful way. I have found that this builds incredible self-esteem and family pride, as well as lifeskills that will be useful in the years to come.	1	1	1
194	2	wrote the theological curriculum that is still taught there today. # It's about pride in where you come from. Building strong foundations and real understandings of where they	1	1	1
195	2	's game for me will be this: how much can these kids muster from pride alone? # The Samford Bulldogs are a good FCS football team. Currently 7-3	1	1	1
196	2	" Dibi-Dibi Gals " are women who have no self esteem, integrity, or pride in themselves. They are usually available to the highest bidders and are considered loose	1	1	1
197	2	how little they are cited anywhere else. In fact it's a badge of pride for them. I know a particularly obnoxious academic who describes his research as "	1	1	1
198	2	memos written by Bybee and Woo. # Your beliefs are rooted in emotion, pride and your selective perceptions, not in fact. You refuse to see the truth	1	1	1
199	2	were better for America. People should throw off the party elites who got their pride hurt. People when smart will not pay these corrupt parties to do their speaking	1	1	1
200	2	into the cold light of day. # Rather than admit error, one's pride can compel one to blame phantom enemies for humiliating circumstances. Thus, as Vince	1	1	1
201	2	may not be able to do it alone. You may have to swallow some pride and you may have to be unconventional - but, generally, you will find	1	1	1
202	2	, even tho their condition is questionable since this " lovely " person has zero pride of ownership in his property, being content to let it run down over the	1	1	1
203	2	, I had an encounter that made me angry, sad, and kind of proud of myself. My partner of seven years, April, and I attended the	1	1	1
204	2	together. # You know, there are so many things for us to be proud of, it's almost hard to keep track. In order to keep the	1	1	1
205	2	can push yourself a little farther. You still did good for yourself! Be proud!!!!! Continued success to you... xoxo Ayana # I'm	1	1	1
206	2	that he could shoot some fish in a barrel, that's all.Nothing to be proud of. # There's a lot of other factors with solar besides the cost	1	1	1
207	2	. # I love a man with a plan! No wonder you are so proud! And to think, one day, I'll be able to say "	1	1	1
208	2	, I only blog positive or humorous things of which I think they should be proud. # This was a wonderful collage of thoughts and pictures, events and ideas	1	1	1
209	2	I need them. Thanks for this post. totally universal. Ira would be proud! # I think you revealed a lot of glorious and truthful nuggets to tell	1	1	1
210	2	rights group National Black Justice Coalition), agrees. # " I was extremely proud, " she says. " I was in shock and awe, but also	1	1	1
211	2	Shanahan about some ideas that we have of utilizing our colors that we're very proud of. But other than that, we're gon na stick to our historic	1	1	1
212	2	about looking good. Introduce it like this " but one thing I'm particularly proud of is when I was at... " or " As well, I was	1	1	1
213	2	think they are. The few of them that are out there are loud and proud, and they SEEM like a mighty force, but they have not been able	1	1	1
214	2	have believed it 100%. This is SO Michelle Bachman -- uninformed, misinformed, proud of it and outspoken. My guess is she has an IQ of 70 #	1	1	1
215	2	pride and wants to perform the responsibilities. # " It is something to be proud of that the guys thought so much of me, the example I set off	1	1	1
216	2	the speech: # Good morning, Denver. Today, I stand before you proud and humbled to be your mayor. It is truly an honor to serve this	1	1	1
217	2	together and work on this logically. Emotion gets nowhere. # Spook # A proud democrat.. FDR was a proud democrat. Johnson was a proud democrat. Obama	1	1	1
218	2	will start pawing at each other some time soon. Am I the only one proud of how well Monroe has come with taking care of Rosalee's shopping? #	1	1	1
219	2	house he shares with his wife Catherine. Christina Baldwin portrays Catherine's role as proud and anxious at once. And she has good reason to be apprehensive: in	1	1	1
220	2	defining moral issues of our time. This is especially unfortunate in light of the proud and noble history of the Republican Party, which was formed to fight the institution	1	1	1
221	2	this state are prejudiced, chest pounding, bravado talking types with little education and proud of it. I would be more than happy to show that bunch... the	1	1	1
222	2	to the polls. Other than the last part, that's nothing to be proud of. # Ignore the trimmers. There's no need for radical change.	1	1	1
223	2	and the wicked for their iniquity; and I will cause the arrogancy of the proud to cease, and will lay low the haughtiness of the terrible. # Matthew	1	1	1
224	2	help. # These are salt of the earth people, people of colour and proud. How dare you say the Nanny State which paid their hotel bills is only	1	1	1
225	2	of congress, news bureau's and hollywood pool side chairs with a sort of proud smugness in themselves. They needed to be seen as relating to the " common	1	1	1
226	2	anybody very much! # But we can be tranquil, and thankful, and proud, For mans' been endowed with a mushroom-shaped cloud. And we know for	1	1	1
227	2	games. But you know your team inside and out, wear your shirt/hat/facepaint with pride? # * You get to a handful of games, buy authentic jerseys and	2	2	2
228	2	Denver fun again the last two seasons! I'll be sporting your 58 with pride this Sunday, just like I do every Sunday! # Awesome you chose the	2	2	2
229	2	won't budge on that issue. # So UT would have to swallow its pride and take the same cut as Texas Tech. # (Cue chuckles from Lubbock	2	2	2
230	2	interview with Azar Nafisi, author of " Reading Lolita in Tehran " discussing her pride in women's involvements there and the impact of Zahra Rahnavard's influence on the	2	2	2
231	2	popular culture -- who try to hold their parents accountable at home. Amid their pride in their children's zeal for all things green, the grown-ups sometimes end up	2	2	2
232	2	We have a large customer base that is growing exponentially. " # Incubators take pride in how exclusive they are and how many " deals " they " reject.	2	2	2
233	2	policy right than trying to get the politics right. There is probably a perverse pride in my administration -- and I take responsibility for this; this was blowing from	2	2	2
234	2	govt. That misery just makes you feel all tingly inside. LMAO LMAO Take pride in what you left	2	2	2
235	2	what they did to her, she never played that card. It's a pride thing I can relate to ". I could write a huge article on all	2	2	2
236	2	elevating itself above the state average of 78.2 percent. # " We're exceptionally proud of the accomplishment, " said CKSD superintendent Greg Lynch. " And to me	2	2	2
237	2	one as a Saigon warrior. I love everyone of you brave guys and was proud to serve with you! You'll all be with me for all time.	2	2	2
238	2	for a long time, but finally she's accepted herself and I'm so proud of her. I think my mom is just absolutely gorgeous. # Sniper,	2	2	2
239	2	. Tonight I'm celebrating a butt-kicking bike ride that my personal trainer would be proud of. I'm choosing to let myself come back to life. # My	2	2	2
240	2	. # Steve from Texas: Im a 62 year old fellow Texan and a proud supporter of George Wallace, Barry Goldwater, and Ronald Reagan. I heard all	2	2	2
241	2	That's right. Honestly after watching Sandeul's musical performance, I was really proud to have him as my friend. I couldn't control my emotions when Sandeul	2	2	2
242	2	years without trial,..... well, the list is almost endless. So how proud is Victor Davis Hanson and his ilk of those grand accomplishments? # Posted by	2	2	2
243	2	Everett's work is luminous, brilliant, thoughtful and brave. I am so proud to be on this earth with him. He is who we all fight for	2	2	2
244	2	, and there it is, but we live in hope. I'm really proud of the episodes that are coming out. More than that, I can't	2	2	2
245	2	About the Author # Stormy Beach # Time for an update. I am the proud father of three, 2, 8, and 11. I finally just moved	2	2	2
246	2	He is a great example to me in so many ways and I am so proud to be his wife. We've been married since August 16, 2008 and	2	2	2
247	2	we've gotten. These are great people to be around, and I'm proud to be their coach. " # Several former Columbia football players, including members	2	2	2
248	2	Taking a moment to gather her thoughts, Powell responded, " I'm really proud of the project for the company... I feel like you have to follow what	2	2	2
249	2	. And how lucky I feel to have two wonderful sons that I am very proud of. One is a dad of our two grndkids and he's just a	2	2	2
250	2	NYCB signature work, Symphony in C. # This year, I'm particularly proud of the events the SPAC staff designed to support the wonderful repertoire NYCB put forth	2	2	2
251	2	these men for president. The best thing they could do and people would be proud to have a president like this would be to use that money to help there	2	2	2
252	2	we didn't have SEC officials in Tallacrappy yesterday. # I was never more proud of the Gators putting a physical, mental, football whooping on the Seminoles yesterday	2	2	2
253	2	17 million dollars - all paid for by the Pechanga Indians. They can be proud of who they are, the City of Temecula should be ashamed!! Our	2	2	2
254	2	feared, and then women will line up for you and your uncle will be proud of the fame you brought to the family, and songs about you will be	2	2	2
255	2	, but make sure you are praising actual work vs. talent. You are understandably proud of your gifted nerdlets (and so are the rest of us) but make	2	2	2
256	2	McDonalds. Cheers to Jay for writing a truthful and accurate article. I am proud to be part of it. # mythusmage July 2nd, 2007 at 8:25 am	2	2	2
257	2	forgot where he came from. He was an institution unto himself and I'm proud to have had him in my corner for so many years. # I'm	2	2	2
258	2	of the best, most caring law enforcement officers in the state. We are proud of our accomplishments and I am proud to call my fellow committee members friends.	2	2	2
259	2	like that when I got back from Viet Nam and Korea both. I was proud then and even more now of what our guys and gals endure to keep us	2	2	2
260	2	Warriors game for each of the past two seasons (which somehow makes me both proud and ashamed). They were live in the middle of the night over there	2	2	2
261	2	, and gave so much for him. He is grateful to them, and proud of their efforts on his behalf. He knows that real men do cry,	2	2	2
262	2	would eschew; some of the things he says about Muslims would do Rush Limbaugh proud. Dawkins invented a whole pseudoscience, memetics, so that he could pathologize religion	2	2	2
263	2	that we share with our children, or the moments when they make you so proud that your chest positively swells. # When Destruction gave his Christmas money away this	2	2	2
264	2	top of our blog somehow! Elise, this was amazing. I feel so proud to know all of you, and I'm so proud of this blog --	2	2	2
265	2	wait to see what works get accomplished tomorrow!! Stupendous!!! SO PROUD OF OUR PATRIOTS!! IF there is anyone who did not see the program	2	2	2
266	2	complement our many Young Adult programs and services. # Through OTZMA, we are proud to have sent more than 1,400 Jewish young adults from nearly 100 communities in North	2	2	2
267	2	hive-five upon learning he scored a date with the likes of Yvonne Strahovski? Be proud of your boy! # 9 Where do we sign the petition to bring Colin	2	2	2
268	2	giving it just as much importance as the Catholics? # Your words make me proud, PZ, but your actions in this case make me sad. We're	2	2	2
269	2	boats all the way down to the novice boat. # " We are extremely proud of our third consecutive points title at the Head of the Schuylkill because of what	2	2	2
270	2	of the many skills of this man. I think that Butkus would have been proud to have his name associated with Russell's in college. I think that he	2	2	2
271	2	of post-partisanship, even when it comes to football. Obama joked that he was proud to have a couple of players from the Green Bay Packers in his audience,	2	2	2
272	2	, " DeMaio said. " But I feel really good. I am so proud of what we were able to accomplish at the city and we are handing over	2	2	2
273	2	" Counties run elections in Pennsylvania... We have nothing to hide and we are proud of the elections process. " # Republican nominee for Attorney General in Missouri used	2	2	2
274	2	way it was meant to me made. We're going to make you all proud. # In our effort to establish the appropriate look and feel for the re-launch	2	2	2
275	2	be grateful. About Elizabeth Perry, Mother of Patient # I am a proud mother to Anna Catherine, a happy beautiful miracle who just turned 3. #	2	2	2
276	2	Developer &; IPP in India with more than 250 MW of Projects. We are proud to recognize Mr MittalTs efforts in the Industry. His passion for making the world	2	2	2
277	2	" Psychopaths " are perpetrating on the Middle East. Hitler and Hirohito would be proud. Now Romney wants to start ANOTHER war with Syria and Iran? Come on	2	2	2
278	2	in St. Clair Shores will be joining the program. # " We were so proud of the kid's from our various communities last year. We hope that the	2	2	2
279	2	veterans - education, healthcare - than Bush did in eight years. I am proud to be able to say: Support our troops - re-elect Barack Obama! "	2	2	2
280	2	by these two former Navy seals is lacking in our current administration. I am proud to know that these two men still honored their oath they took to serve the	2	2	2
281	2	terrifying stories of medically dangerous and sometimes deadly reactions. In Idaho, we are proud to stand with DEA and our colleagues throughout the nation in taking these strong steps	2	2	2
282	2	participated in " Chicago Style Politics " and thuggery to a point Obama would be proud. " If we continue to do what we have always done (vote lesser	2	2	2
283	2	us to better understand and mitigate what is happening in our fishery, I am proud that UMass -- in Dartmouth and in Gloucester -- is at the forefront of finding	2	2	2
284	2	, the UMWA has launched its " Fairness at Patriot " campaign. I am proud to say that we at the Ohio Valley Environmental Coalition support this call for fairness	2	2	2
285	2	do a fabulous job and all of the people who work for her are very proud of the job they do. They do not appreciate Mitt Romney's campaign using	2	2	2
286	2	if. I forgive you. ". I'm one of them, and proud of it. # Melissa # Sherri -- this site IS in fact based on	2	2	2
287	2	at the other areas, " he said. " The thing I'm so proud of is that they're handling it so maturely. I see them now watching	2	2	2
288	2	" But again we seem to make it interesting and overcome' em. Very proud of how we played the game. " # After only one penalty by either	2	2	2
289	2	organization, which holds our nation's veterans in the highest regard. We are proud to have veterans serving on our staff and board of trustees, and we value	2	2	2
290	2	, then they should be allowed to do whatever they want. I'd be proud to have gay moms. # Billy, 24, Promo Worker: Two moms	2	2	2
291	2	happier and less defensive. And his supporters are telling pollsters that they are finally proud to support his candidacy. # A new Pew Research poll released Monday found that	2	2	2
292	2	Geller. Sadly, that's not the case in this context, Hasner is proud of his friendship with Geller. Geller, too, is proud: she wrote	2	2	2
293	2	pride to accede to positions which are here today, gone tomorrow! Are they proud to wear their new stripes, attributed to them by an illegal power? Let	2	2	2
294	2	but so mature and gracious- ber-talented but such ladies. I can't imagine how proud their mothers must be. # Excellent post! You are so right that Olympians	2	2	2
295	2	the state and the federal government work like this. Everyone one here should be proud it was a true team effort. # We all learned some very valuable lessons	2	2	2
296	2	about it much in the future either. But for the record, we are proud to publicly say that we (the founders of HowDoesShe.com) are indeed Mormons.	2	2	2
297	2	environment that is great for employees. The starting point for enjoying work is being proud of the job we are doing for our customers. As such, enamored customers	2	2	2
298	2	, that includes actively promoting the work of small presses such as Just Us Books--a proud publisher of children's and (now) YA books by and about Black people	2	2	2
299	2	theory to beit midrash (traditional Jewish school) style of learning. We are proud to have many queer Jews who are doing their first " Jewish thing " in	2	2	2
300	2	I know they can look back on all the positive things they accomplished and be proud. This senior class meant so much to this program. " # Kimbro,	2	2	2
301	2	be as frank as possible here. I'm a Muslim and I'm so proud to be one and so blessed thank Allah everyday for being one of the chosen	2	2	2
302	2	She is very proud of her Yale family heritage. Fine. And she is proud of her Jewish heritage. But does she have any outrage that Elizabeth Warren STOLE	2	2	2
303	2	men and women and all our soldiers are my hero's, and I am proud to be one of them, and proud to have served our country. My	2	2	2
304	2	would be! For the first time in my adult life, I would be proud of my state. # 35, uncdave, Have you seen any early numbers	2	2	2
305	2	are the details? # Phil Bertolini Commented 27 Days Ago # We are very proud of our State of Michigan! They have earned the " A " rating by	2	2	2
306	2	as a county employee since 2001. # " What would make me even more proud is if the county would offer same-sex benefits for people like me, " Stocke	2	2	2
307	2	investment to benefit our young ones, educators, and this community. I am proud to be a Southington resident when I hear that it is proactively seeking to break	2	2	2
308	2	3251441 Last Ounce of Courage Movie... Speaks to People who are Proud of their Heritage. # Like any message today that speaks of the United States	2	2	2
309	2	. Before you tell people to go back to where they are from- take some pride in where you are from and LEARN HOW TO PROPERLY SPEAK ENGLISH. If you	2	2	2
310	2	(And FTR, I'm not saying that the report is less significant than pride in a well kept home, either.) # What I do know is	2	2	2
311	2	.. My life philosophy -- never die wondering # Ava would be watching you with pride Marty, the love you have for others is endless. If we could all	2	2	2
312	2	said, my family has followed John's life and career with no absence of pride. If there ever were a Republican we might consider voting for, it would	2	2	2
313	2	all about seceding and have all this " Texan " Pride... over and beyond Pride in the USA... by all means traitor commit your treason... I for one	2	2	2
314	2	and/or lesbian relationships, and which have a positive connotation which they can use with pride? I will not pick one out, that is something which should be done	2	2	2
315	2	. I'd bet Aunt Harriet's false teeth that New York would be right proud to make you feel at home. # He didn't so the right thing	2	2	2
316	2	it was. # On the whole, he's made us " huggers " proud this season. Hoping the Vato comes back and gets his mojo working again,	2	2	2
317	2	is good, that's better than when it's bad. I'm hugely proud of " The Forsyte Saga. " # Q. # How do people within the	2	2	2
318	2	can realize the full potential. # But I'm sure there will be other proud iPhone users that will never be able to admit that the battery issue is that	2	2	2
319	2	trying to mix the ingredients for meth in our grocery stores. Ain't we PROUD! # The underlying basis of their hatred is Fear - with a capital F.	2	2	2
320	2	Armadillo built, the rest is history. Jill: Brought up three children, proud Grandmother of six. Worked for Plymouth Council for sixteen years (Council tax,	2	2	2
321	2	teams in 15 years. Only at UGA does the Conference not matter. # Proud to see that this team overcame adversity and kept playing hard to make something of	2	2	2
322	2	to replace it with some observations you have about the people you see doing Denver proud every day. # As we look back on 2012 and forward to 2013 we	2	2	2
323	2	treading a path towards Religious Fundamentalist Political Rule, that would do the Iranian Ayatollah proud if it were Islamic; and as a benevolent neutral observer from up North,	2	2	2
324	2	it turned out not to be true, at the same time I'm incredibly proud of the way people stood up, " said Pam Boyd, a reporter with	2	2	2
325	2	our President's not afraid to make it work. That's something to be proud of, and want to maintain, that approach -- it's not something any	2	2	2
326	2	everyone to constantly ask how they can do more with less. # Cloudability is proud to be launching our General Availability today and to be staking a claim in the	2	2	2
327	2	Reason, as played out in the grand cooperative enterprise called science, makes me proud of Homo sapiens. Sapiens literally means' wise,' but we have deserved	2	2	2
328	2	Containing simple, smart, and sometimes sassy messages from Marylander's who express their pride through the Baltimore Ravens and want to show it. Help us spread the word	3	3	3
329	2	messed up his head so much that he can't even be a symbol of pride to his race? Whatever God intended this man to be.... has been lost	3	3	3
330	2	Sox fan. # " With liberty and justice for all " -- I feel proud when I recite these words in the Pledge of Allegiance, which embodies the values	3	3	3
331	2	actual place in the overall scheme of things. And I say this as the proud citizen of a country that boasts more animals capable of thinning the Homo sapiens herd	3	3	3
332	2	Gte Business to FUND RETIREMENT get Busness to take chances and risk and Mke America Proud again!!! # Banks need to stop relying on Credit Agencies, and	3	3	3
333	2	are big achievements for this country, and the people of Bulgaria ought to be proud of the achievements that they have achieved. " -- June 11, 2007,	3	3	3
334	2	If you had an inkling, you'd know that the afghans are a very proud people: they expelled the british (unlike the Indians and Pakistanis), they	3	3	3
335	2	and to galvanize the community with an event that annually promotes unity, cultivates civic pride, and offers to the world an inside glimpse of the heartiness of its citizenry	3	3	3
336	2	believed obama cares... wanted more free things. Romney ran on fiscal responsibility and pride in ones country... WOW that is too radical... he ran a good campaign	3	3	3
337	2	be more than enough to overwhelm approximately 5 million Palestinians with a feeling of great pride and satisfaction. # They would finally have Peace With Honor. AN APOLOGY	3	3	3
338	2	in their lives that helped them reach this point. Their speeches touch on black pride, black beauty, and the need to support Haiti. # For Michael and	3	3	3
339	2	was raised in the 1960? s in Borough Park with the great combination of pride in Israel's accomplishments defending the Jewish state and a family that had the greatest	3	3	3
340	2	too many young Diaspora Jews that I meet, Israel is not the source of pride or inspiration that it was for their parents' generation. Living in vibrant Jewish	3	3	3
341	2	3223480 There Is A Sense Of Pride From The Tanzanian People # From the first contact that I had with Lynn to	3	3	3
342	2	Puerto Rico as a territory. The people of that island should opt to be proud citizens of a sovereign nation, either the United States of America or the Republic	3	3	3
343	2	to love their pride fed. People don't mean to do this, feed pride, but it happens. # I too want my children to know Jesus above	4	4	4
344	2	pristine stove top. and it sounds easy but as the writer stated ego and pride prevent this from ever being anywhere near as easy as it sounds for both men	4	4	4
345	2	going to end up lining a hamster cage, and even take a kind of pride in " seeing through " the supposed ruse; as a result, Putinism is	4	4	4
346	2	full action on June 11th at the Garden City Center in Cranston, RI proud proud! Jennifer # This past Friday I went with the boys to the Portuguese Social	4	4	4
347	2	of an humble spirit with the lowly, than to divide the spoil with the proud. He that handleth a matter wisely shall find good: and whoso trusteth in	4	4	4
348	2	surprised at the comments I might share: great meal, amazing experience &; so proud! And while these things are true there is so much more than a day	4	4	4
349	2	, Jonathan Odell, and Jillian Medoff, just to name a few. A proud member of the National Book Critics Circle and She Reads, Jaime is also an	4	4	4
350	2	" # -- and I understand now the meaning of this trumpet-cry of love and pride from the greatest of earth's poets -- an Englishman. # ...	4	4	4
351	2	so far off future. # Never underestimate the United States of America. Excessively proud, full of greed and avarice, fat, lazy - yes, all of	4	4	4
352	2	found us in a charming pub beside the Thames with a lovely pint of London Pride. Beer never tasted so good. # More to come including the Victoria &;	0	0	0
353	2	me. # We leave Thursday morning for California to play the Bay Area Gold Pride. My sister, Shira, goes to Stanford, so I'm excited that	0	0	0
354	2	3231938 # All the shots I've posted this week were from the Blackpool Pride 2008 festival, and all were shot on Blackpool's North Pier. This one	0	0	0
355	2	looked (and felt) kind of like the gazelle when he first spots the pride of lions lying in wait. But as I hesitated, it was too late	0	0	0
356	2	CSS. Create your own unique design! PRIDE -- Responsive HTML Template # Pride template is very flexible, easy for customizing and well documented, approaches for personal	0	0	0
357	2	Meals and will vigorously defend our brand, our reputation and our food, " Proud said in the statement. " We stand on our 30-year track record of providing	0	0	0
358	2	of " positioning heterosexuality as the norm for human relationship, " according to the Proud Schools Consultation Report. # " It involves ignoring, making invisible or discriminating against	0	0	0
359	2	ends meet better. They can take a cheap $20 dress and wear it with pride so that they can stay home with their kids. Most foreign women would do	1	1	1
360	2	his or her appearance. Instead, make conscious choices about your lifestyle and take pride in your body. Support Groups # For individuals, friends and families who	1	1	1
361	2	GOP asking what went wrong? They know the answer but they have a foolish pride perhaps that will just make them a bunch of losers in the future.America is great	1	1	1
362	2	to do with the other facets, like aligning your actions with you values and pride (or self-confidence to the point of delusion). Interesting stuff! # Great	1	1	1
363	2	the Cleveland bus driver, the only thing that was really in danger was his pride and ego, which was not going to see him challenged in a way that	1	1	1
364	2	questions. Get email addresses. Engage in the discussion. Once you swallow your pride and engage with criticism, you might find your loudest critic to be an invaluable	1	1	1
365	2	profit more from this than the guests. # They pose with chests swelling with pride in front of the cameras of the press photographers. A passer-by smugly remarks that	1	1	1
366	2	and writer. It is tiresome. It is a way to protect Noyd's pride and show that Noyd's first assessment of me as a troll was accurate.	1	1	1
367	2	's my first big race but I want to remember my accomplishments and feelings of pride when I get ready to sign up for a Half. # Woot Woot -	1	1	1
368	2	Citians who have not yet experienced the Symphony in its new surroundings can still take pride in the knowledge that something special and praiseworthy is going on with regularity inside the	1	1	1
369	2	media, hollywood to hate each other and fight and to get revenge and have pride. but in reality these are the very things that are destroying us. acient history	1	1	1
370	2	waste management facility who strives to be the best at what he does and takes pride in his work. There are not many Kenny's in the ole Bargain Bin	1	1	1
371	2	own irredeemable pointlessness, a person, and above all a woman, of earned pride and real achievement is someone to be feared and hated, for her existence is	1	1	1
372	2	say that Manny has never sniffed a $40 million payday before, but Manny has pride, too, and not getting a cut of the PPV would sting that pride	1	1	1
373	2	last " best-seller " that you read and liked? You always seem to take pride in avoiding whatever the flavor-of-the-month on the list is. That's not much different	1	1	1
374	2	on the head. # zenspace # " above all a woman, of earned pride and real achievement is someone to be feared and hated, for her existence is	1	1	1
375	2	And not only do the winners at this festival go home with that sense of pride for being the best of the best, but the winner of each category receives	1	1	1
376	2	enterprise each year, the players still suit up and play because of pride. Pride they feel for the hard work they've put in, pride for	1	1	1
377	2	his Republican Guard commanders didn't know until the war was underway. # His pride and arrogance would never have let him work with the UN or the US.	1	1	1
378	2	if they then beat us, it would just be another SEC blow to our pride on top of losing to TSUN. I guess losing at Wisc. wouldn't seem	1	1	1
379	2	also right. # 2. they don't know about trust. They will take pride in breaking other people's trust relations, or in having others acting deceptively under	1	1	1
380	2	the early 1930s, at the onset of the Great Depression, people took greater pride in the things they made, when craftsmanship, quality and durability for things like	1	1	1
381	2	single shots or full automatic, I know neither fatigue nor failure I would take pride in my work but for one thing, I do not know my target,	1	1	1
382	2	of silence. There comes a time to eat all your words, swallow your pride and open your eyes. Open your eyes, mind, and heart, and	1	1	1
383	2	House Intelligence Committee # I'm inclined to think that Speaker Pelosi should swallow her pride and have Jane Harman serve as chairman of the Intelligence Committee. But, whatever	1	1	1
384	2	those who don't seem to help themselves. Gives us a false sense of pride in our good deeds accomplished. What Mr. Beck asserts is those in power now	1	1	1
385	2	like the race was in the service of the marathon's sponsors and his own pride. # You started to hear stories. " ABUSE OF POWER: These massive	1	1	1
386	2	years but from now on please count on us so we may also feel that pride in a smaller scale.. # I am glad you are readjusting to the	1	1	1
387	2	donations, because a) it's personal and b) she gets to take pride in her work. What a great opportunity! It sounds like you have a	1	1	1
388	2	I don't go down that route. " # I wouldn't swallow my pride. I didn't care what anyone else thought, and I thought everyone was	1	1	1
389	2	# a job is a job is a job. no matter how menial take pride in your work and the fact that your being paid to perform a task.	1	1	1
390	2	that will not be productive. Like any Ethipian they are stubborn and full of pride too and I don't think we can sway their thinking just like that but	1	1	1
391	2	will not be needed but we must carry it anyway. # I take great pride in what I do. # Sincerely, # Art Groeneweg # Side notes (	1	1	1
392	2	it also is a responsibility -- a responsibility that we carry with a lot of pride, but at the same time it is a responsibility, because we were the	1	1	1
393	2	with Creationists and other ideologues, that it has become a near-obscenity to people who pride themselves on evidence-based thinking. # This question is akin, I think, to	1	1	1
394	2	, which has the shelf-life of egg salad, " says Mr. Stewart, taking pride in being celebrated for his show's " ephemeral " output. # DAVE ITZKOFF	1	1	1
395	2	's very difficult to know who the actual predators are. I understand that my pride is not as important as kids' safety. # As a mom, I	1	1	1
396	2	requests a day and on the weekend anywhere from 75 to 100. I take pride in that, and	1	1	1
397	2	even though my audition hadn't made the cut, is a big source of pride for me. (Notice the correlation with Bo's story?) Or how	1	1	1
398	2	of 1985 to hang my hat on, I always feel a huge sense of pride, regardless of the win/loss record currently, when I tell people, I'm	1	1	1
399	2	carried himself with that dignity -- we've seen it, right? That same pride in being able to provide for his family; that same hope that his kids	1	1	1
400	2	, but I also get the rewards of never conforming and male pleasing.... this pride carries me. # I don't know what this would look like in a	1	1	1
401	2	words, we are " guilty as charged. " We are indeed full of pride for our support of same sex marriage and our work to expand freedom to all	1	1	1
402	2	past decade? # The answer was a resounding yes! # Barb and I pride ourselves on really listening to our clients, and knowing the local market. This	1	1	1
403	2	. You could have one that speaks to your freedom, your liberty, your pride in yourselves. Instead, you have one that speaks to your gullibility. *clap* *clap*	1	1	1
404	2	After the lines have been conquered and her ballot punched, Swenson is overcome with pride. # " I feel accomplished, to be flagged for deletion and possibly cause	1	1	1
405	2	to hear. # What kind of sicko are you when you take so much pride in ridiculing someone elseTs work of art? # I am a writer myself,	1	1	1
406	2	. This is a personal project for Leslie, so she's torn between her pride at April's progress and her affinity for getting the job done, any and	1	1	1
407	2	second-hand in the form of a rumor. And he's doing it because his pride has been hurt. # Alphaleonis60 Thank you for pointing that out! What part	1	1	1
408	2	a million Cabbage Patch Dolls, and as an only child, I always took pride in not being spoiled.... And I'm still cheap to this very day!	1	1	1
409	2	remember that happening, excuse me while me and my hangover go look for my pride. " # I once got a # from a guy who I met at	1	1	1
410	2	, or shot them at will to assert our superiority. # - We take pride is being at the top percentile academically, yet we forget that we made it	1	1	1
411	2	on offensive football and quarterback play and all those things. It tears at your pride a bit because this is my livelihood. I love what I do. I	1	1	1
412	2	such as these. Shake some hands and share some stories. Sell yourself with pride and back it up with great sounding music. Stand up for the value of	1	1	1
413	2	.. men had values. They raised their families, supported their wives, took pride in their work. Todays culture supports " do it if it feels good "	1	1	1
414	2	day's efforts started on the hurdles - my worst event. It broke my pride because no matter how good I thought I was running the mile, it was	1	1	1
415	2	for the child audience. # It's so fun to listen to all the pride and ownership in the award blogs about each blogger's year on whatever committee!	1	1	1
416	2	just fine. There are a lot of women who take a lot of misguided pride in NOT standing with other women against sexism. Basically because they don't want	1	1	1
417	2	partner to go shopping on their behalf. However, some other men take great pride in their own personal appearance, and they aim to look their finest every single	1	1	1
418	2	trivial things like gossip or material goods. # Secondly, a WOMAN should take pride in her self and her appearance. This rule equally applies to MEN. Life	1	1	1
419	2	that I always wanted to be self-sufficient, " she said. " I took pride in that. My relationship with money is that it's a tool to be	1	1	1
420	2	strong? # Before then, we may very well will needs must swallow our pride and eat a lot of crow. # At least that seems to be one	1	1	1
421	2	Japan hears that there is a mass recall, that it is their sense of pride and not an expectation of overtime pay that makes them put in the extra hours	1	1	1
422	2	" God converted my heart from total pride to being able to see through the pride and overcome the hatred and to start praying, " Gruters said. " Once	1	1	1
423	2	not polemic enough? I think it's crystal clear, personally, and I pride myself on being an open book, so if you have any questions, rather	1	1	1
424	2	democracy. " Our aim is to sustain the momentum, " he declared with pride as the very first U.S. president to go to right here. Tens of thousands	1	1	1
425	2	. It will also give readers gist about Nigeria especially human angle stories. We pride our self as the eye of the people. Wednesday, 10 October 2012	1	1	1
426	2	I've ever been a part of. And, I can say with some pride, that I -have- been a part of it. I've volunteered, I	1	1	1
427	2	suggesting that I'm being anything less than candid. " As she expressed her pride as a Jewish congresswoman and Obama supporter, Lemon stepped back, saying he did	1	1	1
428	2	these pictures you see no designer clothes and yet people still lived their lives with pride. They appreciated every little thing and did not waste anything. It was hard	1	1	1
429	2	. I've watched this guy be exactly the kind of Met that Met GMs pride themselves on signing: used to be pretty good; encountered genuine adversity; worked	1	1	1
430	2	The first sermon I ever heard from a woman # 8. Sucking up my pride and embracing the fact that, like it or not, I need community...	1	1	1
431	2	3278700 Volunteering in the City # Something I pride myself on is following the news. This may sound a bit silly; I	1	1	1
432	2	got a film community that is welcoming production with open arms. There's a pride in having a film of this caliber shot locally. " # According to Menzies	1	1	1
433	2	and a 7-11). Not only that, but my neighbors seem to take pride in disgusting me, with thier junk and trash and boorish ways. I'm	1	1	1
434	2	top of an investment firm as rewarding as men typically do. While ego and pride appear to disproportionately hurt men's investment performance, perhaps these same factors help men	1	1	1
435	2	call is answered, the love you show for helping your fellow man and your pride in a job well done, that Whitfield County is a department we can all	1	1	1
436	2	dad is, how we all are, despite our strong personalities or even our pride and our ambitions. Life is fragile, and a gift, for all of	1	1	1
437	2	grew up in a time that was full of infinite possibilities. I doubt his pride or even his mind could fathom that he was facing homelessness -- he scored 1600	1	1	1
438	2	Being a physical force in the Ducks' dynamic running game is a point of pride for Hawkins, a junior in his first season as a full-time starter. Beyond	1	1	1
439	2	you Ross. So people vote ANOMALOUSLY, voted for President Obama again because their pride wouldn't let them admit that they made a mistake? People who are looking	1	1	1
440	2	detailed, consistent accounts (backed up with plenty of documentation) and full of pride in a difficult job well done, well, let's just say I have	1	1	1
441	2	It's then, and only then, that I get a real sense of pride in knowing that I must have done something right. # It stings when they	1	1	1
442	2	so many vibrant colors. (I know -- not necessary, but I take pride in the appearance of my home) # This comment is a little late but	1	1	1
443	2	am a female and keep a very clean and well organized house. I take PRIDE in my home and worked hard to purchase it and even harder to maintain it	1	1	1
444	2	difficult to understand. It all has to do with money. # If you pride yourself as an " academic " (someone who has gone to college -- gone	1	1	1
445	2	hard. # And I'm certain I'm not the only one. Taking pride in ones work is, in Christian terms, recognizing and being grateful for the	1	1	1
446	2	and I hope that he stands tall and represent the office that he holds with pride instead of being " stately ". Personally I feel that he should stop worrying	1	1	1
447	2	your success. You performed well, whether at school or work, to have pride in yourself and to never let down your family. My degree is in history	1	1	1
448	2	a kid again, how to laugh at the simple things and how to be proud at the slightest accomplishment. Our children are considered special and they are. Special	1	1	1
449	2	navigation Lessons I Am In the Process of Learning # I was kind of proud of this journal page and thus decided to share it with you today. The	1	1	1
450	2	years it had been her life mission to tease, harass and generally humble her proud, competitive and driven father, a role she obviously relished. She reported that	1	1	1
451	2	, he writes: # To my fellow Troy residents, # I am very proud to have been elected to serve you as a city of Troy councilman. Unfortunately	1	1	1
452	2	the good and bad, the dark and the light, the things you are proud of and the things that most frighten or embarrass you. All of the past	1	1	1
453	2	legislation to put tariffs on China now. I approve this message because I'm proud to stand up for Pennsylvania. " # For House members in competitive races,	1	1	1
454	2	health and within a while, you will have a great dental health to be proud of. One of the dentists will be sedation dentist Chicago. They are many	1	1	1
455	2	listen. He has a view of the world that is incorrect and is too proud to allow for the possibility that thousands and thousands of economists, who have spent	1	1	1
456	2	a P90X and Insanity graduate in addition to losing almost 40 pounds, I am proud to be a Team Beachbody Coach. To get FREE fitness &; diet coaching and	1	1	1
457	2	a team. # " Stephanie's visit occurred four years ago. I am proud to say that my office remains stack free, my assistant and I now work	1	1	1
458	2	they said money is very tight.... I know someday CUA will be so proud to have nurtured Maddy. # Believe me, this isn't just a stage	1	1	1
459	2	fade from the TV set, I'm left completely and utterly satisfied -- and proud... proud to have realized that it was never about " answers " that I	1	1	1
460	2	to use. # I am mostly curious about why so many atheists resist being proud of being atheistic? Maybe it's my lingering religious upbringing, but I feel	1	1	1
461	2	the years, God be with you all. # Dear killian, not all proud communists glorify Stalin's accomplishments... and North Korea doesn't strive to be a	1	1	1
462	2	, standard size.''' # But the actress, who is the proud owner of a 32F rack, didn't do it. Sofia continued: #	1	1	1
463	2	with that?? " He was also quick to add that he was very proud to have made all of my Lists since 2008... and that taking a year	1	1	1
464	2	3686447 Build a LinkedIN Profile That You Can be Proud Of! # If you are looking for a job, you should count on	1	1	1
465	2	derogatory in their application. I was a Hunky and a dago and was damned proud of it. I ended up protecting a lot of limeys and Krouts over the	1	1	1
466	2	3161121 Talibam! Is Proud to Be the Sixth Grade, Amateur Version of LMFAO # For a feature story	1	1	1
467	2	360clean to reach out to those within minority communities. # " We are so proud to be included on this list of outstanding companies who have shown to provide opportunities	1	1	1
468	2	voice-overing about how it's the one thing he does really well and is so proud of it, was the biggest LOL moment of the last few seasons. #	1	1	1
469	2	" Democrat " candidate? # I've been a *Lefty* for eons and damn proud of my voting record. # Politicalguineapig # October 29, 2012 # Flip:	1	1	1
470	2	wrong. # Pandora was founded on the principle of supporting artists and we're proud to pay performance fees. We think artists could and should ultimately earn even more	1	1	1
471	2	can now call myself a professional. Can you say the same? I'm proud of what I do, can you say the same? # non union #	1	1	1
472	2	to tell you, but let me begin with these: # I am not proud of my online history. Most of it, anyway. I discovered the Internet	1	1	1
473	2	our value, time and cost goals. " # At Apprenda, we're proud to have customers like Diebold recognize the value of our technology and solidify our place	1	1	1
474	2	" who " revels in her unholy connections with evil corporations " and is " proud of the fact that her food is f---ing bad for you. " # Ho	1	1	1
475	2	way to snatch defeat from the jaws of victory but I am very pleased and proud and I am going to savor this for a little while. Thanks to everyone	1	1	1
476	2	entire campus and the San Diego community. # What campaign achievements are you most proud of? I am very proud of the level of board involvement in The Campaign	1	1	1
477	2	what they see in these reactions. I sincerely hope that we will do ourselves proud and portray to the world a people who, in the face of great adversity	1	1	1
478	2	do look much smarter with some rare exceptions. I can honestly say I am proud to be an atheist and even more proud my kids are. # http:	1	1	1
479	2	Texan/Southern or are easily offended, then step off.I chase younger men and am a proud boot wearing, daughter of Texas. About Me # Middle aged crazy,	1	1	1
480	2	out all of the " hard stuff " for them. # He seemed quite proud of the leadership he was providing. # Their agile coach was also their Scrum	1	1	1
481	2	is a chef. That would be impossible. To be a cook is a proud profession requiring years of training and study.. A real cook can handle any station	1	1	1
482	2	by 2012 and above 20% on Grand Bahama -- a record he can not be proud of. # FNMs looking towards the future in a Chairman can not believe that	1	1	1
483	2	from before going inside talking, I'm still that person. I was really proud for having wrapped that part of me up so tightly during my time that I	1	1	1
484	2	are based on civilian sources more than military sources. Yes, I am a proud veteran of the U.S.A.F. # Although understanding the military is a nice perk, it	1	1	1
485	2	candidates could (I did raise a bit over 3k, which I am very proud of), I decided early on that I would need to out hustle them	1	1	1
486	2	fact that as now being a critic with a college degree, I should be proud of the fact that I now have a diploma to be an asshole. #	1	1	1
487	2	suspension body work motor painting it myself in my little garage. I am very proud of what I have accomplised.But I sure would love to park Bubba Watson's Raptor	1	1	1
488	2	much of Apples $140 billion in the bank is yours? why should consumers be proud for paying x5 for the same Chinese made Iphones, does that even make sense	1	1	1
489	2	, as proud as he can be. " # Meanwhile, La Toya is proud to be joining Oprah's cable network with a reality show. " I'm	1	1	1
490	2	the most commercially advanced and prosperous countries at the time. The Dutch were justifiably proud of their accomplishments and the depictions of accumulated goods reflected this pride. Still life	1	1	1
491	2	! FEAR IS YOUR GOD! BOW DOWN SICKO! # Paulv # I am proud and heartened to read these comments... with a few exceptions... But please remember	1	1	1
492	2	Be An Elite Sponsor of Greater Chicago Chapter of HIMSS # Pivot Point Consulting is proud to be an elite sponsor of GCC HIMSS. The chapter assists members of this	1	1	1
493	2	with barbs on it or is he packing a giant icicle that'll teach a proud girl a valuable lesson about old-time religion? # I agree. Those misrepresentations are	1	1	1
494	2	. For the most part, I paid my own way and I am extremely proud of that, considering my income and how tuition costs continued to rise in that	1	1	1
495	2	to be out. It's important to stand up and be counted and be proud of who you are. I'm happy if I can help anyone else in	1	1	1
496	2	i scored best off all kids. that was the only test i was really proud of in school. # wauh now that you aspeak of acting, i had	1	1	1
497	2	how do you stand in front of the cameras and Lie about it and act proud of that so called win! Disgrace! The NFL is a billion dollar business	1	1	1
498	2	Joe Nocera's rant (it was hardly journalism) was anything but his most proud moment. Add to this the despicable behavior of people like Jim Cramer, the	1	1	1
499	2	act like it. Everyone has lied. Everyone has done something they're not proud of. Keep your head up, keep taking photographs, and all of this	1	1	1
500	2	a tremendous victory and he has since served well in Congress. I am very proud to have had a small role in the Barletta victory in District 11 in 2010	1	1	1
501	2	" # BMI Federal Credit Union, William P. Allender, President/CEO # We're proud to be headquartered in Dublin, Ohio with renovated, contemporary facilities that will help	1	1	1
502	2	it, I've made negative comments about some SOs before. I am not proud of it, and it's something I am done with, but I know	1	1	1
503	2	the Lung Cancer Alliance. # He said that he and his wife are most proud of the scholarship that was set up the same year Lauren died. Initially funded	1	1	1
504	2	for my application to the Upper Canadian Judicial system of which I really feel so proud! # **31;3281;TOOLONG Today I have felt like, you OLRB have thrown at me	1	1	1
505	2	Whatever you did today was a necessary step to get to tomorrow. So be proud of yourself. Maybe you are not as good as you want to be,	1	1	1
506	2	" The article begins by reporting a choice that did the entire Duke lacrosse team proud (unlike the choice of " entertainment " for that infamous party last March)	1	1	1
507	2	were close to 3 hours. In fact, 4 hours would have made me proud. # And, since I consider myself a serious runner, I know people	1	1	1
508	2	that I had to get through to get to this place. I'm very proud of myself for making it back on the court and then playing as well as	1	1	1
509	2	past hurl the first rock, I say. # Hey, I am not proud to admit it, but I had a few moments here and there when my	1	1	1
510	2	believe she did that. Mine was a 9-page masterpiece though. I'm very proud of it. I wrote it on Hemingway. Farewell to Arms. # All	1	1	1
511	2	moment that all these steps matter. Each of us should be allowed to be proud of our true self.... # The interesting thing is that no one ever speculates	1	1	1
512	2	is all this risk and service worthwhile for me? How can I be a proud, happy, and fulfilled person if I am in a relationship where I am	1	1	1
513	2	that degree of brokenness. My wish is that you stay safe and strong and proud. # Cute. Not everyone has the resolve to take this level of vitriol	1	1	1
514	2	agree that she had me hooked immediately and was impressed that she was open and proud of the fact that she's an author and speaker! You do have an	1	1	1
515	2	is. It said " Obama Girl. " Too cute and she was SOOOOO proud of it. Last weekend, I left work at the hospital and walked to	1	1	1
516	2	and were luminescent about it. They explained that it gave them something to be proud of and excited about. The BY girls heard and I could see the envy	1	1	1
517	2	but he kept looking for cover. Just once he should have stood tall and proud. He should have pushed back when the moderator called time. Romney didn't	1	1	1
518	2	system at the Hilton Inn in Bellevue in July. He seemed even to be proud of operating radio with such cutting edge technology. # It was not such a	1	1	1
519	2	, I giggle. I have bathed in my flaming liberalism and have been very proud of it. It's a label I am proud to wear. When we	1	1	1
520	2	own little headline-grabbing tantrum requires a level of cynical self-interest any corporate banker would be proud of. # Then again, political theory doesn't have much to do with	1	1	1
521	2	feuds, and showing off his best work were some of the things Benoit was proud of. He would compete every night, with nothing to lose, and would	1	1	1
522	2	can resort to the kind of things they've said, then they should be proud to own this. All who vote for it and all who support it own	1	1	1
523	2	which is due in cinemas May 17th, 2013. # " We are so proud of these seats, because, when they recline, you can fit a tub	1	1	1
524	2	the best that I can, and come out the other side, and be proud of all that I did accomplish during this time, and try to make peace	1	1	1
525	2	are familiar territory for accountants. You live and breathe these numbers. You are proud to be able to produce these numbers for your clients, as you should be	1	1	1
526	2	against the Raps, Sullinger announced his arrival to the NBA world. He was proud of it. # " It feels good, " the rookie forward said.	1	1	1
527	2	lessons from the sacrifices made. I am proud to be a Vietnam Veteran and proud of every man and women who served there. They are my brothers and sisters	1	1	1
528	2	back to taxpayers for a nickel, is one of the accomplishments I am most proud of. The number of college students using Pell grants to help them pay for	1	1	1
529	2	positive comments. It is comments such as yours which make me extremely happy and proud to be a teacher in this beautiful	1	1	1
530	2	upon my vesture did they cast lots. " **40;0;TOOLONG... I hope you're proud of yourself. Proof positive there is no such thing as evolution. Digression?	1	1	1
531	2	the 5th grade on up). I really liked Stephanie's story and was proud to edit it. # Yes, it had been forever since I'd heard	1	1	1
532	2	went when called to serve in Vietnam For that I stand tall! I am proud. I am a Vietnam Veteran! # George Martin, Da Nang RVN #	1	1	1
533	2	Trinity. # DR # What a word salad! The sophists would have been proud of this, their young padawan. I haven't read anything that ridiculously over-inflated	1	1	1
534	2	opera's Saturday radio show for years. # But the thing he is most proud of is his work with high school students at the Academy for Professional Training he	1	1	1
535	2	the projects I've been involved in over the years, one I'm most proud of has been working with an orthopaedic clinic, working with older fracture patients,	1	1	1
536	2	filled with profane humor, hope, courage, and spirituality. I am very proud of the book and I have several chapters of very practical advice for anyone with	1	1	1
537	2	of the things I'm proud of here at Whatever is that the comment threads are usually actually worth reading,	1	1	1
538	2	refraining. " The rabbi knew when to quit, and he wasn't too proud to admit when he was wrong. # We all know what it's like	1	1	1
539	2	of the climate agenda smacks of an idealism that ironically those same governments would be proud of and it has absolutely ZERO to do with science. # We found in	1	1	1
540	2	develop a sense of humanity. When we saw you in space shuttle, your proud sense of humanity and enthusiastic behavior and your approach towards your own background and race	1	1	1
541	2	size... Not pretty. # Back in the day, I used to be proud that my scripting language of choice didn't do what Java does for memory management	1	1	1
542	2	" - Mahatma Gandhi # JanuaryMan, unfortunately I have. Something I am not proud of, but felt cornered at the time. As I already had little self-esteem	1	1	1
543	2	then laying him back down. # I will be using this post for my Proud Mommy Moment on Thursday. Since Thursday is my birthday- I have another post in	1	1	1
544	2	and more importantly, can actually help the team win now -- I'm pretty proud of it. " # periculum wrote on NatsJournal: 9/12/2012 2:36 PM CDT Lannan	1	1	1
545	2	is higher than at UT. Photo Courtesy: TexasObserver.org # I have been a proud member of an undocumented youth movement ever since I joined a " DREAMer " organization	1	1	1
546	2	same time, him in Plano and me here. I think he was pretty proud of that. I know I was. # Some of the old-time sheriffs never	1	1	1
547	2	State, we believe we are the Best REALTORSr in New Jersey. We are proud to be the first major independent residential real estate firm in New Jersey where the	1	1	1
548	2	and the resulting shame until you deal with it yourself. I'm prettyK damn proud that I said " I refuse to fucking live like this ". Yes I	1	1	1
549	2	wanted one of the best educated teaching staff in the state. # I was proud to do so, even at my own cost. # NOW, they want	1	1	1
550	2	networking tools available to you today. Conferences # The Customer Management IQ is proud to present a Global portfolio of events covering the entire Customer Life Cycle across multiple	1	1	1
551	2	wealth heavily concentrated and large American corporations operating as de facto monopolies, our once proud capitalist system has been replaced by Fascism that only serves the wealthy elite. What	1	1	1
552	2	from across the planet: You are so very impressive. # Be so very proud of yourself Jenny, so very proud. Each minute, hour, and day	1	1	1
553	2	much they wanted it, " Pham said. " I couldn't be more proud. " # Set No. 1 started in the Knights' favor as the Tommies	1	1	1
554	2	you anything else other than our latest posts. # Contract Attorney Central is also proud to announce its own LinkedIn group. Please join, start discussions and comment,	1	1	1
555	2	people who designed, built, maintained and flew the Space Shuttles can be very proud of their achievements over the past 30 years, despite two tragic accidents (both	1	1	1
556	2	self-defense. Odo warns that Kozak's family may demand vengeance, but Quark is proud of his increased earnings, at least until Kozak's brother D'Ghor arrives and threatens	1	1	1
557	2	I finished in 34:59, 11:18 pace. # In the end, I was proud of what I'd accomplished and freshly-addicted to crossing the finish line. 2012	1	1	1
558	2	's Dinner with... well, you guessed it... Pie! We're very proud to be a part of such a great cause. For those of you who	1	1	1
559	2	shrug my shoulders, wince, and say, uh, America. I feel proud (again, for all of the people willing to jump on me) to	1	1	1
560	2	with subjects pertaining to my area of expertise and content of which I can be proud. Yet, for some mysterious reason, my name was chosen from the entire	1	1	1
561	2	examples. # This question is for Representative Kline. The Congressman has been very proud of his strong record for casting his congressional vote during his ten years in congress	1	1	1
562	2	my personal capacity, which is my only capacity these days. I am very proud of my military career. However, I never viewed myself or was viewed by	1	1	1
563	2	?? / Then I was so relieved that the SPLC was involved, so proud that I am a contributor as are many of my relatives. My first experience	1	1	1
564	2	newborns, The Partnership for Maternal, Newborn &; Child Health (PMNCH) is proud to mark November 17 as the second annual World Prematurity Day. This global day	1	1	1
565	2	family and her daughter. She is joyful. She is thankful. She is proud. She is where she should be after years and years of struggle. And	1	1	1
566	2	Learning English is very important in our community. They're serious about it, proud of the fact that they are learning English. They want to take these classes	1	1	1
567	2	, they were pretty. Those were the days on the farm. I'm proud to say I grew up on a farm. There is a certain pride in	1	1	1
568	2	. I knew I was a plain girl. However, I felt special and proud of myself when people looked at my drawing and amazed. So I drew a	1	1	1
569	2	immigrants -- but we have to enforce the border as well. # I'm proud to have voted for Romney. I think in the new year or two,	1	1	1
570	2	down the stairs in the dark. Then I can walk up the stairway, proud as you please, with the stairway lights on. # Now, you might	1	1	1
571	2	a tobacco grad filter and turn saturation to 11. ffs. Charlie waite would be proud. Best pics are those of him in the landscape. # Paul W #	1	1	1
572	2	the database has become a sign of maturity. # This is something Meyer is proud of. " When a new web tracker comes on the scene, they often	1	1	1
573	2	. FDL has opened up a new world and I, for one am as proud as I can be that I have been here for that. Besides, it	1	1	1
574	2	all of our lives were put out there for everyone to see would we be proud? I doubt it. I admire Kristen for not giving up on the love	1	1	1
575	2	this large of an update since the 1980? s. The administration also is proud to have corralled 13 major carmakers to support the new regulation. # The new	1	1	1
576	2	head. # Congrats on your graduation! Very exciting, and you should be proud of yourself. Having recently obtained a master's degree, I know that course	1	1	1
577	2	to say egg before chicken. My folks are good West Coast Liberals (and proud of it). Science as a major was actively encouraged as it dovetailed with	1	1	1
578	2	Trans-Jordan. But the terrorists, far from being ashamed of their act, were proud of this massacre, publicized it widely, and invited all the foreign correspondents present	1	1	1
579	2	be spoken of in the same breath as Van Halen. But they were oddly proud of their moniker, and they played the vermin card hard. Lisa Dean,	1	1	1
580	2	is oh so important in those early days. In fact, I was so proud that I made my mom who was staying with me come see what I had	1	1	1
581	2	Adele doing a James Bond theme song. # Something the singer herself is pretty proud of. # " I'll be back combing my hair when I'm 60	1	1	1
582	2	not be judged. Just remember, we're here for you. # Be proud of yourself. You've taken the first step to getting better. A lot	1	1	1
583	2	away. I needed a moment to remind me why I teach and seeing how proud he was the rest of the day made it all worth it. # I	1	1	1
584	2	see the original team coming out and commenting on this story. I was a proud owner of the very first Mac and take my hat off to all of you	1	1	1
585	2	thank you, students, for supporting your hard-won freedoms by standing up and standing proud in an auditorium filled with your peers and community members. You truly rock!	1	1	1
586	2	? Bill: It's a warrior code concept -- a risky achievement to be proud of versus an enemy, one that gains you admiration/respect among your fellow warriors.	1	1	1
587	2	and EDM is a staple of Top 40 radio. The diva can also be proud of her uncanny knack for picking clever collaborators. But unfortunately, none of those	1	1	1
588	2	the height of his battle with Hillary Rodham Clinton, Mr. Obama said he was proud to have campaigned in 57 states. There are only 50, of course.	1	1	1
589	2	for a long time. " # He certainly followed his own advice and was proud of being the oldest man in the world. 9. Maggie Pauline Barnes	1	1	1
590	2	f**king moron. " That means that our opinions are that different. I'm proud to be at the opposite end of the spectrum from him. # The direct	1	1	1
591	2	as to achieve breakthroughs for the DEMONCAT party elsewhere. # You should be so proud of sacrificing your intellect, dignity &; honor for the Democrat party. # Gasbag	1	1	1
592	2	weak and my parents can't tell me depression doesn't exsist... I'm proud to be a survivor, proud to be a warrior -- I will always have	1	1	1
593	2	need to arbitrarily construct priorities amongst problems. # " For myself, I am proud of my atheist upbringing, in which humanist values defined an ethical framework for a	1	1	1
594	2	a little less hopeless. THANK YOU!!!! # You should be proud of yourself for taking a very scary step in putting it all out there like	1	1	1
595	2	insights of several of our employees on a variety of communications topics. We are proud to participate in the	1	1	1
596	2	10:09 # One more ting, rasp. Those things you mentioned that you are proud of, the 3193638	1	1	1
597	2	of the job that y'all do, " Collins said. " You should be proud of yourselves and continue to do the best with whatever you have to do with	1	1	1
598	2	asshole: " You're really Rather, aren't you? " Are you proud of yourself? Is spoofing people on the internet the height of your accomplishments?	1	1	1
599	2	very foreign to me and it's weird to hear.. # I am NOT proud of it but I did not do any form of exercise... correction I still	1	1	1
600	2	little tidbit, " with great privilege comes great responsibility " Stan Lee would be proud of that one. # That reminds me, I need to get my dad	1	1	1
601	2	in a sopping mess. Theodor, on the other hand, stood tall and proud despite the hunch age had brought to his back. Thinning hair and thick beard	1	1	1
602	2	" Bain the Job Destroyer " spoke to the " Gotham " audience about his proud past with " partner-in-crime, Mitt Romney. " # Click through the slideshow to	1	1	1
603	2	but I found Paula Deen's Crock Pot Mac n Cheese recipe. I am proud to say that it turned out wonderfully. I will be making it for our	1	1	1
604	2	a great car. I can run up front and lead laps. I'm proud of that. If I can take the lead without wrecking myself, that's	1	1	1
605	2	, not only did many young men and boys have mushroom haircuts, they were proud of it. You weren't cool unless your mom put a bowl around your	1	1	1
606	2	's senior citizens to finish his career in Florida would be a start. # Proud of his accomplishments and in constant need of admiration, Rodriguez may hold his postseason	1	1	1
607	2	go in if he is sick. Gary also looks forward to payday and is proud when he shows me his check. # My reason for writing is currently my	1	1	1
608	2	three or four million jobs you wish to create, are jobs that people feel proud to have. # People often tell me that Dirty Jobs reminds them of a	1	1	1
609	2	. When Strom Thurmond ran for president, we voted for him. We're proud of it. And if the rest of the country had followed our lead,	1	1	1
610	2	back to me saying, " I got more Mommy! " She was quite proud of her loot. # Towards the end of the night, we saw some	1	1	1
611	2	Kohrs commented, " I have greatly enjoyed my tenure with Tornier, and am proud to have had the opportunity to work with a fantastic team in growing the company	1	1	1
612	2	miss the point, being that YOU LOVE what you do, you are very proud of it, it is top quality, and because it brings you so much	1	1	1
613	2	things which he finds interesting. # SkyLab was probably the project he was most proud. # What possible dirt could one find on Salk and what possible reason could	1	1	1
614	2	with a second bold lie. This one: # Democrats have a long and proud history of defending Civil Rights and expanding opportunity for all Americans. # The DNC	1	1	1
615	2	to discover who is behind the leaks, finding Javier Bardem's Silva, a proud lunatic with a history involving M. # This time, Bond's got to answer	1	1	1
616	2	October 14, 2010 # Thanks for posting this. Also, I'm particularly proud that after reading it like twelve times, I finally figured out " band "	1	1	1
617	2	election) we are all after the same things in life -- and Chevy is proud of the fact that it has been bringing people together for over 100 years by	1	1	1
618	2	bed garden. It was my best year of growing tomatoes and I felt so proud of what I had accomplished. # As you can see from the picture above	1	1	1
619	2	a surplus of something. If they really need it, they will be too proud to admit the need and too proud to ask for public assistance. # But	1	1	1
620	2	has their own business, the work must get done &; you have to be proud of the work you're doing. And as for those cookies, I'll	1	1	1
621	2	) btw same pinch on this. I am like you. And am not proud of it. We can onlytry so much. ESP with a toddler at home	1	1	1
622	2	's are now beginning an Oscar campaign for the film which Velazquez should be very proud of contributing to. This might just be the break she's been looking for	1	1	1
623	2	write YA. I'm a blogger, an opinionated high school student, a proud ranter. I tend to make posts where I scream at no one in particular	1	1	1
624	2	you can't weasel your way out of your sick comments. Someone who is proud to be a cheap bastard. Wow. Most cheap people try to hide it	1	1	1
625	2	Sopoaga, as well as safety Donte Whitner. " The San Francisco 49ers are proud to join ItGetsBetter.org, to let all LGBT teens know that It Gets Better,	1	1	1
626	2	little bit is to be TOO OUT. You have to live honestly and be proud of who you are. If you're lying about who and what you are	1	1	1
627	2	me for Artillery support. This war affected each one differently and I' m proud to have servrd with such brave men. At the end of my tour I	1	1	1
628	2	did, call that obsessive. Steve, I resemble that remark, and am proud of it! # I do agree that east coast based writers always bring up	1	1	1
629	2	jon abbey, because he doesn't even pretend to be substantial. # very proud of this, thanks. also, here's some substance: your perspective on	1	1	1
630	2	. Scrivening: limited, generalizable, a system complex enough to make Gary Gygax proud. Gods' magic: SMITE, the end. What, you think the	1	1	1
631	2	I don't know your situation but I will say this. I am a proud union worker and will be till the day I die. I struck so people	1	1	1
632	2	share of the responsibility for making America a good place to live, and be proud of yourself for doing so. Many people have given their lives to preserve our	1	1	1
633	2	students are motivated to attain academic success. For instance, most students will be proud after attaining an A grade and will be upset after obtaining a low grade.	1	1	1
634	2	so that it won't happen? when your instinct is right, you feel proud of yourself but often truths are hurting.. it's like a bomb is fixed	1	1	1
635	2	. But there are probably others that do. # There are bloggers that are proud that most of their traffic DOES N'T come from Domaining.com. I value the Domaining.com	1	1	1
636	2	don't " sell out " to those Pop-up advertisers, and we're too proud (so far) to ask for donations, we'd like to proudly point	1	1	1
637	2	. # your very our blessed nation has to die for she has become to proud and God says He will humble the proud and exalt the humble. it is	1	1	1
638	2	for those votes for years while ignoring the key issues the Republican Party should be proud of. # We did not lose the Hispanic vote because of Immigration # The	1	1	1
639	2	them than they are of me. By all rights, I really should be proud of how tall I am and I should have carried myself with confidence when in	1	1	1
640	2	in line with our dedication to diversity and community involvement, Scripps Networks Interactive was proud to once again be the presenting sponsor of the KAUL's largest fundraising event of	1	1	1
641	2	bit of kick in the shins for the band as a whole. I'm proud of it, but there are things that in hindsight we should have done differently	1	1	1
642	2	. Recipient of the 2010 Honorary Life Member Award from ISPI # I am proud to be the 2010 recipient of the highest award given by ISPI - International Society	1	1	1
643	2	. I want to get back to that mentality. I want Congress to be proud to serve their country instead of doing it to get rich and feed their greed	1	1	1
644	2	's two balls out, " Tiger said, giggling hysterically. Woods was very proud of the line he'd thought up. Those were beautiful moments. # Walker	1	1	1
645	2	it will actually make you look like you're dressed appropriately. Look at how proud these Japanese guys are of their hats. They're also so drunk!	1	1	1
646	2	# After unprecedented excitement (from me if nobody else), I'm extremely proud to announce the release of my new novella, Scribbling. Scribbling is pretty much	1	1	1
647	2	, 2012 # Antaeus -- I was not being sarcastic -- I am still very proud of my limited involvement in that project, because I was able to give the	1	1	1
648	2	. That is the way we do it here in Mason County. I'm proud to vote and wish that all of America felt the same way. I always	1	1	1
649	2	3175958 # She seems remarkably proud of the fact that she doesn't agree with women who feel that they've	1	1	1
650	2	foreigner and adopting their practices. And that should NOT make you feel happy and proud. It should make you feel weird and uncomfortable " # I did feel weird	1	1	1
651	2	vote for him. It was incumbent upon Obama to explain to the undecideds how proud he is of his record, what he will do in his second term,	1	1	1
652	2	follow my thoughts. I know I lived it, but I'm pretty damn proud of how many things I predicted that turned out to be right. # Many	1	1	1
653	2	of mom. # And yes, I suppose in a little way I'm proud. # See, my kid barely eats sandwiches. She ends up bringing the	1	1	1
654	2	served with many WSWII vets &; their experience and leadership were inspiring. I am proud to have touched that Great Generation. # http: //none Don Renninger # Noticed	1	1	1
655	2	stage. Don't be discouraged by the unwitting losers in this argument. Be proud and emboldened by the fact that you have changed many people to become better to	1	1	1
656	2	ever admit they matter/exist: # you would have to condemn your own brazen and proud apathy and detachment # &; # you would have to stop flying off the deep	1	1	1
657	2	be to do the honours! A long long time ago I may have been proud, but a million scritchings later my fingers just feel tired;) He is	1	1	1
658	2	the world's political strength. But that doesn't mean you should not be proud of who you are and be honest about it, because there's a lot	1	1	1
659	2	(1993) -- " Connie Czapski " KL: I was really, really proud of that part, and, quite honestly, I felt... I've played	1	1	1
660	2	make it in there. Military service would've killed me. I am a proud man, and I can't accept being humiliated by anyone, and the only	1	1	1
661	2	fighting it. Well they did. Lots of people did. Personally I'm proud of it, even if I regret that our political naivety, coupled with the	1	1	1
662	2	Dale and what he is trying to do for our community, and I am proud to be able to carry his eggs and call him a colleague and friend.	1	1	1
663	2	older than you who's done all these things. " # He's also proud of his off-the-cuff style, saying he never prepares for interviews, whether they be	1	1	1
664	2	(Applause.) # But let's be clear -- while Barack is very proud of all that we have done together -- because understand that this President knows that	1	1	1
665	2	sure I could have shown the same strength in the given situation. I am proud to know you and wish to help spread the word. Your friend -- Toni	1	1	1
666	2	it is those in power who use their militaries against there own people. How proud some of these Sandhurst and other European military school graduates must feel after a day	1	1	1
667	2	phone, and it finally gives me an iPhone that takes pics I can be proud of in any company. # * EarPods! Unless you had absolutely no expectations	1	1	1
668	2	Having baked and designed for brides, celebrities, and even Klingons, Marie was proud to share her wealth of baking knowledge in her two cookbooks: " The Spirited	1	1	1
669	2	news. I seem to remember a time, decades back, when Montana was PROUD of its independent thought, and i wonder how much money was spent to break	1	1	1
670	2	about his new music releases because it's heart warming seeing someone so optimistic and proud of their work. I think Alex is just proud of his talents, and	1	1	1
671	2	# i am 76 years old. i was it the boy scouts and was proud of it. it was part of the church and their belief. the boy	1	1	1
672	2	cheerleader you can be. Speak out loud and do your self talk, be proud of yourself, be proud of who you are and be proud of your dream	1	1	1
673	2	the messiest it has ever been. This is one side and I'm not proud of this: # I've been working on cleaning it for a couple hours	1	1	1
674	2	helped a lot with your lion heart! # Fantastic! You should be so proud of yourself for helping stand up and speak for those who can not speak for	1	1	1
675	2	I got to do when I turned 18 was to register to vote. Also proud to say I haven't missed a single presidential election, nor most of the	1	1	1
676	2	the mentality of people who don't return stuff! # Sheldon Cooper would be proud that you are trying to replicate his eidetic memory. Perhaps you could also quickly	1	1	1
677	2	! About the Author # Akradon # The Chief News Editor for MyXboxLive.com and proud of it! Always interested in any Xbox 360 news and information. Love to	1	1	1
678	2	the two walls, insulated using induction heating for the payload. # Are you proud of your new " status "? We were wondering where you were for almost	1	1	1
679	2	, and it also I think encourages a mental laziness. I am not always proud of what I say, but I need to own it. # And that	1	1	1
680	2	, because of intensive testing. # Blalock, an award-winning teacher, deflected his pride to two of his graduate students. He said they did a barrage of tests	2	2	2
681	2	so she's clearly talking about her husband's campaign as the source of her pride. # It's uncanny how many times Obama supporters are willing to step forward	2	2	2
682	2	Airborne! Take two salt tablets and drive on!! I have such great pride in my fellow Americans who head towards conflict instead of cowering in safety. They	2	2	2
683	2	respect for our Jewish-American contributions defending the United States in war and peace. This pride has been instilled in my children always emphasizing my grandfather's consistent gratitude to this	2	2	2
684	2	. Working with sick or mistreated animals does not benefit anyone, most scientist take pride in their lab and as part of that lab the animals are treated very well	2	2	2
685	2	with all of them. # I love that he makes my heart swell with pride, for my president, my country, and my party. # I love	2	2	2
686	2	torah " era of the Pharisees at the time of Christ. Legalism breeds religious pride. Pride does not equal godliness. # The Puritan era was possibly the greatest	2	2	2
687	2	in Pennsylvania. It happened before I met him, before he showed me with pride the SS uniform his grandfather had worn during WWII, before he tipped our Waffle	2	2	2
688	2	's cool, " he said. # Paige agreed. " You have some pride when your husband's down there and your father's down there and whoever is	2	2	2
689	2	about America... they show strength, determination, love, compassion and well deserved pride in their father. Also, your wife is a prize... to take charge	2	2	2
690	2	developers try and make their game more accessible. There's a certain sense of pride in belonging to a small, dedicated community, and no one wants casual players	2	2	2
691	2	, evening-length Symphony No. 6. More News # For a city whose civic pride is tied so closely to the fates of its professional sports teams, this has	2	2	2
692	2	party. This guy, Swanson, pathetically boasts at a bar about his civic pride as a hipster of Williamsburg, Brooklyn. The problem is youth has run out	2	2	2
693	2	# Said Andre Banks, Executive Director of All Out: " EU member states pride themselves on integration, but their governments still fail to resolve the legal hurdles keeping	2	2	2
694	2	cried when I heard Johnnie's was closing: they hired C-town residents and took pride in being one of the few remaining family-run grocery chains in MA &; the NE	2	2	2
695	2	Australia. In hindsight, I have a feeling it was actually Tully but town pride prohibits me from admitting that oops I just did. Anyway, seem's BC	2	2	2
696	2	third oldest state bar foundation in the Nation, something all Oklahoma lawyers can take pride in. Since its inception in 1946, the OBF has awarded more than $10	2	2	2
697	2	to the side and targeted by our enemies. They do this because they see pride in them that their troops lack greatly. These cowards shall be faced with our	2	2	2
698	2	rarely agree about anything. They find common ground in their love of pomegranates, pride for Iranian athletes competing internationally, respect for Mohammad Mossadeq, the 1950s prime minister	2	2	2
699	2	compete in the global marketplace, " Gov. Perry said. " I'm proud to see that the number of Texas students aiming for a brighter future is skyrocketing	2	2	2
700	2	first to acknowlege this issue and how unfair the situation has become. I am proud that he is able to see the situation objectively. # #27 Katie 10:01	2	2	2
701	2	and appears effortless on stage, which is sure to make her coach Blake Shelton proud, but still, her	2	2	2
702	2	what makes me proud to be a member of such an upstanding community. So proud. # Hot! 6 8 Thrill says: # November 16, 2012	2	2	2
703	2	I am of them. And I will bet you anything that they are as proud of this president as I am. # This road we have traveled has not	2	2	2
704	2	how to recognize the different notes and how fragrances were produced. I was very proud of him. # Romano's grandfather Robert Ricci # What is your first olfactive	2	2	2
705	2	. Ten wins is a significant number of wins in a season and I'm proud of everybody for doing that. " # -- Richt on facing Georgia Tech after	2	2	2
706	2	cutting. Idk why I just shared that... sorry. But you make me proud and thankful and happy. Nothing you ever write could make me feel any different	2	2	2
707	2	Michael Jackson's daughter. # " I love my dad, and I'm proud to be his daughter. I just don't think the title' M.J.'s	2	2	2
708	2	. # First thing first, we are parents just like you. We are proud of children. We want to protect our children and give them as many wonderful	2	2	2
709	2	you never turn your back on the ones doing it for you!!! Proud of the Veterans that came before me and Proud of them now! And for	2	2	2
710	2	to innocent people. Get over yourself. And it sounds like you are actually PROUD your husband was able to smuggle a pocket knife on to an airplane after 9/11	2	2	2
711	2	I just read this whole thread and wanted to really tell you that I'm proud of you for everything you're doing. I would love it if you kept	2	2	2
712	2	records that are joyful and socially conscious, Bella said that what he's most proud of is the band's ability to endure. # " From the beginning,	2	2	2
713	2	. " # More hands went up. # " Own it. I'm proud of you. If you're a nerd, like it. Own it.	2	2	2
714	2	you we talk about it, we tell him weekly, maybe more, how proud we are that he came back to us. We say, " remember when	2	2	2
715	2	. # Is this correct? # Also, I don't think you're proud that I've mastered Google. I think you're being passive-aggressively sarcastic. -Instead of	2	2	2
716	2	. We 3207270 Proud mom of two through the miracle of open adoption It Was Only a Matter	2	2	2
717	2	see these pictures. He is in the hospital with cancer. I am very proud of him. # dan # I am sure there are as many poignant pics	2	2	2
718	2	them went &; LOVED IT! Runza's are a great meal and I'm proud that they're based in Nebraska. # Before Runza restuarants there was the big	2	2	2
719	2	Seattle a superbowl in 2006 so get over it. Obviously Seattle fans are not proud of that disgusting call but asterisk or not its a win for Seattle and until	2	2	2
720	2	at one time, " Norfolk Southern CEO Wick Moorman said. " We're proud of the role railroads play in keeping the country's economy strong, and July	2	2	2
721	2	four Ivy League degrees and two children who would make any soccer mom or dad proud. This was the perfect formula for deeper Democratic inroads into the burbs. #	2	2	2
722	2	hopefully travel to MEET eachother! Lol # That is great news I am so proud for you and so proud that the employer took time to want to know what	2	2	2
723	2	awful things. # I feel so proud of you all. I am so proud of having worked to do some of the following things: # Helped HRC with	2	2	2
724	2	their, I am sure that he was and that you can be very very proud of him. # Janeteaston # I was 17 and intended to marry the only	2	2	2
725	2	you can use TexasMary or MaryFromTexas. If you are a student and you are proud of your school, you may also combine it with your name like HarvardGalMary.	2	2	2
726	2	Long Time, No See # As a fellow depression sufferer, I am so proud of you. One, for hanging in there as you got to the other	2	2	2
727	2	. BYU finished the meet with a total of 245 points. # Eyestone was proud of his team's success throughout the season and with the way his team finished	2	2	2
728	2	the blanks, been a long time. # 1. Something I am very proud of is... Boyfriend. 100x over I am proud of boyfriend. He has	2	2	2
729	2	been better informed before I birthed our babies. # ay. i'm so proud of you to build up this and share this story. it is really something	2	2	2
730	2	quick praise from House Speaker John A. Boehner (R-Ohio). " I'm proud of my governor... for taking a stand and resisting the federal takeover of healthcare	2	2	2
731	2	who knew him. he was the kind of young man that anyone would be proud to call son, grandson and friend. # Vigil service will be 7 p.m	2	2	2
732	2	, and not what eBay is today: a modern global marketplace. We are proud that the eBay community remains diverse and connected -- and that the eBay shopping experience	2	2	2
733	2	, selfless and intelligent people I could ever hope to meet. I am so proud of her success in the interior design field but even more proud to call her	2	2	2
734	2	seriously can you take the blinders off long enough to see that we should be proud of her husband and 5 sons for giving two years of their live to completely	2	2	2
735	2	look different it doesn't take away from my heritage, my culture and how proud I am to be part of it. Can they maybe make her culture more	2	2	2
736	2	mad at them. This is hard for anyone to do and I am very proud of you for taking the higher road. # Hey Shoe: Thanks for being	2	2	2
737	2	gadgetry over at Wired. And, for the record, Jones' father is proud. Comments # Don't just sit there, join the conversation! No	2	2	2
738	2	in a hope that I can show it to my religion teacher and make him proud. " WOO MING JIN Woo Ming Jin is an award winning director from Malaysia	2	2	2
739	2	... i don't like my husband deployed or coming home destoyed but i'm proud of him and his fellow " Joes " every day that i wake up and	2	2	2
740	2	" and another person who tweeted " #JesusIsMyCandidate because He loves the LGBT and is proud of their courage. " And there was not a thing any of us could	2	2	2
741	2	Bonus for me.... B is one of his assistant coach's. Makes me proud to see my 3 guys on the field together! Anyway.... I had the	2	2	2
742	2	team. 2 comments: # I command your efforts and I am soooo proud of your achievements. The English department is doing a great job and creative achievements	2	2	2
743	2	favorable one indeed. # And the Shah was a great leader we can be proud of. He was NOT perfect, but for his time and place we can	2	2	2
744	2	. They were so proud, and I was so proud of them for being proud. November 03, 2010 # We inadvertantly gave Frances a vegetable rather than	2	2	2
745	2	's. When I got my Associate's, my parents were really, truly proud of me. # I didn't finish my Bachelor's at that time.	2	2	2
746	2	the rapist's control is to raise a child you and the community can be proud of. Something might have been lost during the rape, but immense rewards are	2	2	2
747	2	. # Anyhow, it's that part of me that's really kind of proud of you, in a way -- not that I have any right to pride	2	2	2
748	2	too -- moments when you just know that he is looking over you, so proud, and sharing in your happiness. congrats to you! can not wait to	2	2	2
749	2	ravaged Sandy. # " I support President Obama four years ago and I am proud to stand with him today. " # Springsteen, who praised President Obama in	2	2	2
750	2	it for you!!! Proud of the Veterans that came before me and Proud of them now! And for the ones who gave it all we shall by	2	2	2
751	2	and a Licensed Massage Therapist. I was born in MI. I am the proud parent of three grown children and two beautiful grand children! I am happily married	2	2	2
752	2	baby smell. She's beautiful Mami. # I hope you know how very proud I am of you and the hard decisions you made for your sweet girl.	2	2	2
753	2	there's only small victories before that fear sets in. But I'm so proud of you and your battle to keep going. There are so many people who	2	2	2
754	2	injury, I don't know if anyone caught that, so I was really proud that she tried to go out there and play through that tonight. It may	2	2	2
755	2	your cesspool' comment to be offensive. Let me just say, I'm proud of the restraint Mefites have shown. posted by newdaddy at 2:50 PM on April	2	2	2
756	2	a few ways and some of those ways go BANG! # I'm a proud Texan and signed the petition. It is not about seceding, it is about	2	2	2
757	2	Iranians, so please mention that these are YOUR opinions. Second, I am proud of Anousheh too and she inspired me so much, but instead of being a	2	2	2
758	2	Because they are the bravest responsible people I know in my life and Im honestly proud of them. Now Mrs. Clinton is doing somthing right for US. Lets see	2	2	2
759	2	TV series, Beverly Hills Nannies. Marika Tsircou and her attorney husband Kyri are proud parents to son Xander, 13 months, and they use a part-time nanny on	2	2	2
760	2	America Stadium in Charlotte, N.C. on Dec. 1. # " I'm very proud of our team to come out on the road and get the Atlantic Division Championship	2	2	2
761	2	little girl that dreamt of being a princess to a reigning queen! I am proud of her and Thank the NAM organization for all the opportunities you have given my	2	2	2
762	2	earning awards as a wire service, magazine and broadcast journalist. He is most proud, however, of his daughters. Ann is a PhD in neuroscience and Beth	2	2	2
763	2	no, don't deny it, I know you have, and I'm proud of you for putting a bit of heat on the NCCAM leadership to try to	2	2	2
764	2	? Oh, sorry, is it only democrat women? We should all be proud that there are more and more women in the government. If there was a	2	2	2
765	2	so proud of him for getting a rank in AIPMT. I myself was so proud of my bro. He became my role model and that desire to become a	2	2	2
766	2	and is one more voice that inflicts shame upon so many innocents. i am proud of you my dearest amy, i am saddened by such heartlessness. # I	2	2	2
767	2	Lewes Herriot all of the fucking top serious Johnny Foreigner cohort, who we are proud to call our friends, including visual fifth man Benjamin Rausch and driver Evan Bernard	2	2	2
768	2	I have worked with in the past five years. Everyone has said they're proud of us, and I'm proud of my staff too. We have no	2	2	2
769	2	have not signed up an will not, but as of right now I'm proud to be a texan because sooner or later Obama will have to speak out and	2	2	2
770	2	but I know now how many people you reach out to. I'm so proud that you reach so many people. I know you have inspired me and I	2	2	2
771	2	the Navy. He served two tours of duty in Viet Nam. I am proud of these and all veterans. I thank God for these heros and patriots of	2	2	2
772	2	Why lead a life of shame being a dupe for obstructionist? Make your child proud of you Rob. Do you want to be remembered as a hopeless lickspittle for	2	2	2
773	2	you die, slowly and alone and sobbing. # You think Jesus will be proud of you and your attitude when you show up in Heaven? He'll be	2	2	2
774	2	destructive: there is enough of that in world already! About Me # Proud Father of a recently married son attending BYU-Idaho, and a beautiful YSA daughter.	2	2	2
775	2	Aside from that, i would just like to say again; i'm so proud of the fandom, and so lucky to be a part of it. <3	2	2	2
776	2	Anonymous # Effective and insightful comments, CrisEdwardJohnson! # Anonymous # I am very proud of the Mainers who voted to fight for our voting rights. Congratulations! #	2	2	2
777	2	intelligence, lucidity, civility of VDH's article and the commenters. I am proud to be associated with you if only as a reader. I too am beginning	2	2	2
778	2	" stole " it, IMHO. My guess is people are just sharing how proud they are of these soldiers and others. " On Facebook, she elaborates:	2	2	2
779	2	am proud of you jenny for beign a fighter and maybe tomorrow i can be proud of me too. # What a great time to post this, being the	2	2	2
780	2	example of courage and integrity in science for decades to come. I'm very proud of you and Georgia Tech. Stay strong and hold your head high. #	2	2	2
781	2	without a doubt, that the Democrats do not have a policy they can be proud of. The lies told by Joe Biden about our Embassy attack and innocent lives	2	2	2
782	2	with trophies named after them and rooms full of accolades. # I'm so proud of my boy Dublin and I'm thrilled that he finally has the hardware commensurate	2	2	2
783	2	a model for how our nation can advance educationally and culturally, and I am proud that the Museum of the City of New York is part of that. I	2	2	2
784	2	the run. Well, he's dropped that.... # " I'm proud of Governor Romney tonight. I think he did an excellent job. " #	2	2	2
785	2	time or more into tennis as anyone we had, and I was just really proud of what she became. " # The other half of the Lady Eagles'	2	2	2
786	2	degree, I fully understand and appreciate the need for skilled tradesmen. I am proud to that my oldest son has chosen the trades as his career path and,	2	2	2
787	2	out to the world. Let's not be ashamed of the Gospel, but proud of it. We need to be boldly visible in every facet of society.	2	2	2
788	2	want the validation, and besides, how will Mommy and Daddy ever be properly proud of me unless they can direct their friends to some professional saying I am a	2	2	2
789	2	all the hypocrites in your blog Senora Sanchez. You were all haling loud and proud how Hugo Chavez was about to be defeated in the elections. Well, much	2	2	2
790	2	Whoa, more personal attacks, your so full of win Mr Sheens would be proud of you. I don't blow my comments out of my ass, although	2	2	2
791	2	of San Diego on the USS Benfold, I know his grandfather would be so proud that his grandson was carrying on the Navy tradition. The pictures on this sight	2	2	2
792	2	work. # It is this high level of integrity and analysis that makes me proud to be associated with Mary Morgan, Dave Askins, and the Ann Arbor Chronicle	2	2	2
793	2	the First Time in My Blog. " # Well said! I am so proud of you. You and others of your generation make me realize why I and	2	2	2
794	2	a clear, positive message from a true leader. # I want to be proud of our leader and speaker. I want a mayor who represents all of Lakeville	2	2	2
795	2	of an English bachelors, and most importantly husband of the most amazing woman and proud father of three wonderful girls. Life has taken me on some crazy and wild	2	2	2
796	2	with reverence and rich in history- I can say with certainty that it made me proud to be a Catholic! Thank you for introducing it to me! # I	2	2	2
797	2	and helping people realize their dreams. She has some fancy degrees but is really proud of her two children	2	2	2
798	2	Give me stength to be half the person this little man is. We are proud of you soldier and proud for you to have a wonderful family as this.	2	2	2
799	2	in Vietnam. oh, and Switzerland. # Anonymous # You do your family proud. Keep it up! # Higher numbers on Palin threads! Got ta love	2	2	2
800	2	I'm saying close. " The singer even adds, " I'm very proud of him. " # Is There ANY Truth To The Romance Rumors? "	2	2	2
801	2	. He Mixes disorienting electronics with an intense orchestral score. # I am so proud of Rian Johnson. He did it! He made the movie he wanted to	2	2	2
802	2	players have shown that they care about the world, and that makes us very proud.? # The charity: water organization is dedicated to bringing clean, safe drinking	2	2	2
803	2	all this ugly? I did finish my honors paper. my instructor was so proud and happy (i was the only student attempting anatomy project -- all others are	2	2	2
804	2	our youth are headed.This " riot " in a man's establishment makes me feel proud of one thing-I am a graduate of Grover Cleveland High School.. Respectfully, Gregory	2	2	2
805	2	love for you. Thank you for letting your light shine. I am so proud of you! Don't give up! # Sister Elaine S. Dalton # "	2	2	2
806	2	diehard Obama supporter. # But he voted for Obama in 2008. I am proud of him, because dad was a racist and he admitted it. When I	2	2	2
807	2	, but now sounds just as bad. # One thing I have always been proud of is when Republicans do the right thing in cases like this -- it's	2	2	2
808	2	they wanted to dedicate their book on Primates to Mr. Kandamby. It makes me proud to know that none of these young men have forgotten their teacher and their mentor	2	2	2
809	2	christians ", by 72 virgins and wine, by impulse to make their parents proud. And his conclusion was almost that it is' out of control' not	2	2	2
810	2	as their time of greatest shame. # As a 7th generation Tasmanian I'm proud that many scientists have taken up the work of the Tasmania based late great John	2	2	2
811	2	to remember that and honor it and for them to remember just as were are proud of our heroes who serve we are proud of these men on the Ryder Cup	2	2	2
812	2	religion, against whom Jesus spent much of his ministry preaching. # I am proud to belong to a church from which, during a community-wide celebration of our community	2	2	2
813	2	you're working to help other families. I'm sure he'll be very proud of you! *Hugs* to you, mama! # We've talked about it	2	2	2
814	2	the worst human rightss violator in the world at the time is someone Sassan is proud of. The man who was never elected, but was installed by a CIA	2	2	2
815	2	properly has his or her ballot counted correctly. " # " I am extremely proud of the excellent service of our elections staff and the more than 340 volunteers who	2	2	2
816	2	that comes across the internet. Thank you for sharing. # I am extremely proud of his service to our Country. # GOD BLESS AMERICA # Ron Hall #	2	2	2
817	2	subjugate and slaughter all those Palestinian women and children so as to make Jesus very proud of us.. You people are real smart. # The Israelis don't suppress	2	2	2
818	2	still meant something. " " " " " # Well we Kiwi are quite proud of our Lord Rutherford; but I don't remember him splitting the atom;	2	2	2
819	2	this realm. # Trend #6: An Explosion of Innovation. I'm pretty proud of my brother (Andrew Hargadon), who wrote the book How Breakthroughs Happen	2	2	2
820	2	65,000 members represent every state and every industry in the U.S., and we are proud to be the nation's first small-business advocacy organization. Please visit www.nsba.biz.	2	2	2
821	2	words for this. It is so great to be here and I am so proud to be part of the Sounders family. Thank you to everyone who was here	2	2	2
822	2	being promoted by these type of pathetic and stupid articles. The old lady is proud to talk about great and wonderful to be racist. REDICULOUS! # I live	2	2	2
823	2	sorry for your loss. Matthew was the kind of man we can all be proud of. These words come to mind " saw wrong and tried to right it	2	2	2
824	2	read your book. Thank you for doing what you do. I am so proud of you! # Replacing clothing " size " with measurements is just placing emphasis	2	2	2
825	2	to our side of the world even more challenging. Laura said she was very proud of me for not squeaking once during the trip. # I shopped on Wednesday	2	2	2
826	2	that will ensure these dear little people are always close by. # I'm proud to call Fi a friend of mine.... and I'm proud to volunteer alongside	2	2	2
827	2	n't want to let you down. " # " You know we'll be proud of you no matter what, " Mom replied, sounding offended that she had	2	2	2
828	2	in a match like this you can't afford them. But I am extremely proud of this team. " # The Lady Bisons are 18-12, ending a string	2	2	2
829	2	Their site is perfect for all of your party planning needs, and I'm proud that they use their QuickLabel Vivo! Touch color label printer to make all kinds	2	2	2
830	2	classic photo of Beiber and Usher... http: **29;0;TOOLONG My mom would be so proud of my photoshopping skills. ----------- Louise, you did it? You're a	2	2	2
831	2	, I countered it with logic and calm. # Mr Spock would have been proud of my application of Vulcan logic. # I even went so far as to	2	2	2
832	2	joys in our lives. 5 comments: # Jacolyn, I'm so proud of you. I too was pondering the tough things of life today, but	2	2	2
833	2	outstanding commitment to the immigration and refugee stories of all Americans. We are very proud of her accomplishment. # As a state agency that advocates the advancement of the	2	2	2
834	2	to actually register as Democrats and participate in nominating Democrats that we can all be proud of. # Once we can get a supermajority in both halves of Congress,	2	2	2
835	2	129 shows without Bruce giving him so much as a nod but The Boss was proud of Christie and with the help of Obama the two finally got to speak.	2	2	2
836	2	to the other room while making outraged gurgling noises. In reality I'm secretly proud of their potency. I also like to smell my own dirty socks and underwear	2	2	2
837	2	This kind of compassion and sincerity is very difficult to fake. This makes me proud of both President Obama and Governor Christie -- seeing and watching working together to help	2	2	2
838	2	and dedication have had a significant impact on our brand's craveability. We are proud of Stephanie's accomplishments and believe her future contributions to the brand's success will	2	2	2
839	2	not give in. you are on the side of morality and Justice. we are proud of you. # Omar Saad, I salute you for your courage and conviction	2	2	2
840	2	. But from one warrior to another, I want to say that I'm proud of you. You've found a way to laugh at life and that's	2	2	2
841	2	, because you can tell that even though they were poor, these people were proud of their accomplishments and proud to be Americans. We've lost our former glory	2	2	2
842	2	) had the odds stacked against them. # Coach Thanh Pham said he is proud of how the team handled the game's atmosphere. # " To be down	2	2	2
843	2	. You opened my eyes to a world I never dreamed existed. I am proud of you. Stay on the path you chose. Never lose sight of what	2	2	2
844	2	dad reminds me that work is not the be-all, end-all. # I'm proud of both of my parents for where they are and for what they've given	2	2	2
845	2	was in attendance at the game Monday night. I want to say I am proud of the way the team handled themselves what great sportsmanship and CLASS.... I think	2	2	2
846	2	Dublin to be our global headquarters and our home, and we are excited and proud to be a partner of the city's future. " # Dublin has greater	2	2	2
847	2	. He said that officials throwing flags is part of the game and he was proud of the effort his team showed. # RMU put themselves in a hole to	2	2	2
848	2	time to these little boys. # I disagree with that, I am so proud of this black man and I am not saying because he does not have that	2	2	2
849	2	protesters are an embarrassment to average Americans and pose a serious diminishment to our national pride and sense of self-esteem. # All of Palestine that existed when the Romans called	3	3	3
850	2	the goyim. But why? Don't the Jews have a sense of racial pride just like everyone else? No. They are less a race and more a	3	3	3
851	2	Shining House on the Hill ". He encouraged people to look forward and take pride in our country. I think we needed that in 1980, although I think	3	3	3
852	2	is just as great an accomplishment, well worth celebrating. One reason for national pride that we don't hear much about is that medal count is actually related to	3	3	3
853	2	's hard to blame any black American for not feeling pride in their country. Pride is also not essential for devotion. # only Obama acolytes blinded by their devotion	3	3	3
854	2	# It is common to hear people condemning nationalism on the grounds that love and pride for one's country need not reach such extreme lengths. This " love and	3	3	3
855	2	likely to happen given Mr Romney's attested views on what we here still take pride in calling the welfare state. Number four is to be achieved through completely untested	3	3	3
856	2	decided to use hatred of Jews to bring the nation together and try to instill pride by giving the nation a common enemy to hate. You know the results.	3	3	3
857	2	seeing the USA as just another big country among the nations. # Playing on pride generated by the Olympics, Romney can remind voters to feel good about America.	3	3	3
858	2	for reasons other than having something to hide. May I suggest national sovereignty and pride? it is stupid, but true. # Iran claims they stopped cooperating with	3	3	3
859	2	. We should always be proud of who we are, but again, that pride does not make anyone exempt from understanding the African diaspora and embracing all of our	3	3	3
860	2	simply can not provide for themselves due to physical or mental handicaps? Will black pride ever convince their race to take full advantage of those things that would encourage their	3	3	3
861	2	quintessential American dessert, serving as a culinary symbol of the nation's prosperity and pride in the 19th and 20th centuries. # Apple pie consists of a pastry pie	3	3	3
862	2	see the light # This has been going on for decades. Kids have no pride in our nation. They have no national identity. Parents tend not to talk	3	3	3
863	2	Let the aliens wait until we are ready and we can speak to them with pride in our achievements rather than profound shame. In the meantime SETI can sell coffee	3	3	3
864	2	I have ever heard at Kelly/Shorts Stadium, overwhelmed me with a sense of national pride. # Moments like those are precisely what I am talking about where goosebumps cover	3	3	3
865	2	correctly and not having a cell phone. # http: //Yahoo Gwen Corley # Pride in America has been compromised; we take for granite this beautiful country we have	3	3	3
866	2	which belongs to you, in your national capacity, must always exalt the just pride of Patriotism, more than any appellation derived from local discriminations. With slight shades	3	3	3
867	2	an opportunity to become a citizen. I believe that would instill some sense of pride in being an American rather than what will eventually lead to separation movements a la	3	3	3
868	2	it may, their one big disagreement was on the subject of Ethnic and Racial pride. He, the (actual!) Socialist and Unionist, had no use	3	3	3
869	2	because she is not white. # One of the things that North America should pride itself on most is openness, a melting pot society where EVERYONE is equal.	3	3	3
870	2	Eisenstein, was a filmmaking feat of special effects, grandiose scope, and national pride (re: jingoism). It also came out at a time when Hitler	3	3	3
871	2	a nation of their own called Israel and it gave their people a sense of pride and encouraged them to learn more about their own history. Marcus Garvey had it	3	3	3
872	2	. # " The idea that *nothing* this country has done in 27 years warrants pride, at least if you're black. Until now that is. Now that	3	3	3
873	2	/CNW/ - Folk music is an important part of our heritage and a source of pride for Canadians. The Canadian Folk Music Awards, which were first presented in 2005	3	3	3
874	2	to explain why fans support the players they do. It could result from nationalistic pride, or even a chance encounter on the grounds of a tournament. No matter	3	3	3
875	2	follow trends, and not only the negative ones. I like when France takes pride in a new discovery, or Brazil becomes energy independent with sugar and aircraft manufacturing	3	3	3
876	2	have been intensifying in impact -- exceeds $897 billion. # As American we often pride ourselves on our common sense, which is summed up in old adages that go	3	3	3
877	2	people act and be involved in public policy always makes me feel a sense of pride in our country. Knowing that we choose our leader and that we will follow	3	3	3
878	2	breast, macaroni and cheese, baked beans and scrumptious strawberry shortcake. # Patriotic Pride shines at Country Tonite # Country Tonite: For two hours of classic and new	3	3	3
879	2	and for the first time in my life I feel a sense of love and pride in my country. There is an actual possibility that each and every one of	3	3	3
880	2	Wall of China. He found comfort in helping others. He also took great pride in his Mexican as well as his Native American heritage, and the name that	3	3	3
881	2	# I've always been proud to be an American. Today I am also proud to be a Wisconsin native and the descendant of immigrants who settled in Wisconsin and	3	3	3
882	2	still stands for freedom and they can't take that away # And I'm proud to be an American # What he didn't understand -- and judging by the	3	3	3
883	2	have to do with what I'm talking about. # The country I'm proud of is one whose ideals I embrace. It isn't about one moment in	3	3	3
884	2	at 11:28 am # (68) earl says: # How can i be proud to be a american if america wont help the ones who need it.I worked evry	3	3	3
885	2	A Bloke in the Pub Told Me ". # It doesn't matter how proud she is of being an Ethiopian, she will have experienced racism. For you	3	3	3
886	2	is making in the battle to curb greenhouse gases. Yippee! It makes one proud to be British! (sarc). # another great item summed up well	3	3	3
887	2	. # So what? GPM is exactly the sort of story we should be proud of in America. We should want more businesses like GPM to be started.	3	3	3
888	2	does Kyle Carpenter appreciate what it means to be an American. # I'm proud to be an American. Despite the petty political partisanship, uncontrollable consumerist culture,	3	3	3
889	2	" rise up my beloved people! the bandas are coming to take over our proud, ancient nation! " simply becouse the top positions are not held by his	3	3	3
890	2	. # This flag pole remains a powerful symbol of the town's story and proud American spirit. Built masterfully, its pivot and counterweight still move effortlessly, even	3	3	3
891	2	mentioned are not the people I'm concerned for, it's those who are proud of their nation, their faith, their historic culture, that's where my	3	3	3
892	2	, I was born in PR, but raised in NYC and I'm a proud Puerto Rican American. I hope to see statehood in my lifetime, but if	3	3	3
893	2	American individualism. # " There's no question that the Bond films make one proud to be British, " says pop-culture historian James Chapman of the University of Leicester	3	3	3
894	2	former Socialist Bernie Sanders), I have also always been proud of America and proud to be an American. Proud of the ideal, proud of the concept,	3	3	3
895	2	cant even get help and we are the ones who pay so no im not proud to be a american.a lot of people die for our country but our contry forgets	3	3	3
896	2	For me, it is so easy: # In Taiwan, you are not proud of being called " Chinese Culture ", even you do nt like any thing	3	3	3
897	2	using blackberry and twitter. Those kind of things wouldn't make me any less proud to be Indonesian, unless you're accepted to be just that typical. Many	3	3	3
898	2	. I love our President and our First Lady. I have never been more proud to be an American. I proudly sing the star spangled banner. I proudly	3	3	3
899	2	Gandhiji has all over the globe, so many schools in his name. Feels proud to be born in India after seeing this, October	3	3	3
900	2	all who serve... and all that are left at home... I am so proud to call myself an American... and so proud of this young man and his	3	3	3
901	2	least of which is our record on issues of race. If Michelle Obama is proud of her country for embracing a black presidential candidate a mere generation after the fight	3	3	3
902	2	I have emotionally signed off from US politics in 2008. I'm American and proud, and I want my country to be strong and overcome the trials that we	3	3	3
903	2	that's not a old habit! # 3) It looks like you are proud of French resistance to America. I were you I would look for motives to	3	3	3
904	2	given us five lovely grandchildren. I was born in England and while I'm proud of my English heritage, I am doubly proud to be a true-blue, fair-dinkum	3	3	3
905	2	times in a month. # We hear all this talk from the Right about proud to be an American, about how our soldiers are fighting for " freedom "	3	3	3
906	2	example of this. # Here is one guy saying' Go Home'' Proud to Be British' outside of a mosque. And he gets six months.	3	3	3
907	2	3195274 Photo of the day: PROUD TO BE AN AMERICAN -- NO MATTER WHAT # PROUD TO BE AMERICAN -- NO	3	3	3
908	2	her German family regularly, celebrates holidays with German traditions, and is generally very proud of her culture. But then people still joke about Hitler to her. #	3	3	3
909	2	with her husband's winning the Democratic nomination it was the first time she was proud of America. # One can gather from this article that Michelle Obama uses the	3	3	3
910	2	I _x0002_\\...; not offended at all, ” he insisted. “ I ’ m proud of my heritage and being Asian. I really like the way my eyes look	3	3	3
911	2	choice -- that there are a hell of a lot of choices between " really proud of my country " and " ashamed of my country ". Posted by:	3	3	3
912	2	a game-winning touchdown pass in order to thank this nation's veterans that make me proud to be an American. About the author # IWasATeenageMcCarthyist # It really is	3	3	3
913	2	I will not give Her up for lost without a fight. # I am proud to be an American and I believe my country may be saved yet, though	3	3	3
914	2	resents his blackness and lashes out to compensate for this sad insecurity. I am proud to be a black man. However, being black does not require me to	3	3	3
915	2	won this election based on negative campaigning and giveaways! America is suppose to be proud? # Not going to happen, Marcus!!! You have shown yourself	3	3	3
916	2	a tenth of what is expected of him. # I have never felt so proud to be an American last night this country showed me that they want to change	3	3	3
917	2	a country with many lnder and free cities. All of them have been very proud of their independence. And all countries around us have been very satisfied with that	3	3	3
918	2	wife) KNOWS! As she said! (For the FIRST time I am PROUD of AMERICA??) # I am so disillusioned and am sorry I bought	3	3	3
919	2	honor of visiting the Tomb. If nothing else in our wonderful country makes one proud to be an American, this is it. I'm not surprised one bit	3	3	3
920	2	, so nostalgic, incredible pictures brought tears to my eyes. I am so proud to be an American. # Gene Jones # Before my time but my parents	3	3	3
921	2	These pictures made me realize even more how many heros we have. I am proud to be an American. # http: //FingerlessFiddler Roy H. Thackerson # Had three	3	3	3
922	2	# Nor Michelle Obama's " proud ", because they're still not " proud " to be Americans. # Anonymous # Well and the NY Times running a	3	3	3
923	2	demanding significant campaign finance reform. # Nice post, Mark. I'm extremely proud to be an American, too. I voted for him in FL and was	3	3	3
924	2	to finesse a respectable answer out of this one. " I thought I was proud of my country before, but now I know what it is to be really	3	3	3
925	2	's portrait of " Scream " that they have support in our once educated and proud nation, that has slipped socially and intellectualy into the 1840s. # Anonymous #	3	3	3
926	2	towards your own background and race, made all of us, Iranian Muslims extremely proud. You truly a real human being. A real Iranian woman Good luck to	3	3	3
927	2	now be the last bastion of ethics and justice on earth. I would be proud to be called Israeli as I once was proud to be called, and to	3	3	3
928	2	change their names, starve off their Jewish fat, and then talk about how proud they are to be Jewish. " But in My Lives, she writes about	3	3	3
929	2	# Image credits: Video and photographs by Rob Whitworth and used with permission # Proud to be a Malaysian, there are numbers of awesome places for photographers! #	3	3	3
930	2	the edge of the universe. # ABOUT ME - I'm a Catholic and proud American, a former Marine fighter pilot, currently a business executive, writer and	3	3	3
931	2	with the proud. " (Proverbs 16:18-19) # The only true antidote to pride is humility. An " antidote " is defined as " a remedy to counteract	4	4	4
932	2	and its cause was pride, the sin of sins. Satanic pride, any pride, is, theologically speaking, a perverse will, literally a will that turns	4	4	4
933	2	dress slacks) and a dress shirt. The uniform was a big point of pride. It also held a lot of Soviet symbolism (pins, kerchief, etc	4	4	4
934	2	real change. With endeavors like HUE Leadership and United Way's Project Diversity and Pride Leadership and the AIDS Resource Center Ohio's Greater Columbus Mpowerment Center, we could	4	4	4
935	2	it's well written. # My tattered old copy of that literary treasure " Pride and Prejudice " (romance (yes it is too!)) is on	4	4	4
936	2	# Encyclopediac knowledge of STAR TREK is a MENTAL DISORDER, not a matter of pride. # STAR WARS played into people's nostalgia for serials and had big explosions	4	4	4
937	2	. " 1 Peter 5:5 NLT # Pride sets a relationship up for failure. Pride and arrogance fuel conflict and erect emotional walls. We must choose against pride and	4	4	4
938	2	the way, I hated The Art of WarT, Crime and PunishmentT, and Pride and PrejudiceT. " # Hem. Firstly, I thought Bella was sooo modest	4	4	4
939	2	untrimmed: But the eternal summer fadeless owner Can not afford to lose thousands of pride, Or just kill thousands ow'st In eternal calm wand'rest grow'st Man and tens of	4	4	4
940	2	our own walls and give our people jobs restoring and making America beautiful again. Pride in oneself and pride in ones country. God Bless America and God Bless You	4	4	4
941	2	power is greater, more efficient, and free from the entanglements of greed and pride. # The nun has no business demanding minimum wage from anyone. She obviously	4	4	4
942	2	pride " bulls*it. " That was her very own words quotation mimic on the pride and all.. # So your only gay friend is only part gay, lol	4	4	4
943	2	He called a creature called a leviathan the " king over all the children of pride. " That combined with other clues in Job leads me to believe that the	4	4	4
944	2	that created very memorable gaming experiences. # And yet, I still pick up Pride and Prejudice, Gatsby, Blood Meridian--if not to read all the way through then	4	4	4
945	2	's a provenance I'd covet, but it seems to make hophmi swell with pride. # Are you seriously incapable of understanding why Israelis would legitimately fear what would	4	4	4
946	2	I live in a world where the personal fight for mental stability is viewed with pride and public cheers instead of shame. " is incredible. # Cheer today,	4	4	4
947	2	, and all we can get from it. The past, the future, pride and pack mean little more than what we can get from them, so long	4	4	4
948	2	because God may intervene in our minds to create empathy and understanding, taking away pride and envy, and so on and so forth. # People should see this	4	4	4
949	2	, " which serves his stubbornness and defiance. None of us had to learn pride. We were all born with it. # Pride is the doorway that leads	4	4	4
950	2	wisdom of patience or a 10th century Japanese narrative poem that illustrates the pitfalls of pride. This base state of knowing he's right will inform many initial decisions throughout	4	4	4
951	2	is the expression of that neglect. # No loyalty, no patriotism, no pride, just word vomit taught to them through the liberal public schools. Parents naivly	4	4	4
952	2	. # So, yeah, at the center of the Arab universe, where pride and shame are everything, be the United States saying with certainty that a dictator	4	4	4
953	2	to be if that is their fate) will be able to talk about with pride not whispers or silence. # Which only serves to keep me honestly working for	4	4	4
954	2	3278551 Gaza City - Gazans Watch With Pride as Hamas Strikes Israel # An Israeli child and her mother run towards their apartment	4	4	4
955	2	. The LGBT/LDS relationship in SLC is unique, though. Other cities with LDS Pride contingencies this year (such as in Seattle, Portland, San Francisco, San	4	4	4
956	2	ride in our once proud country. All around us the pedestals of value, pride and good will have been eroded by the divisive views that come through at Fox	4	4	4
957	2	of Israel is blooming and is peaceful. Same here, we accept your " pride issue " and will be giving you the honor to that Israel lost the war	4	4	4
958	2	you can watch the trailer right on our homepage, then get in on the Pride &; Joy action yourself. All you need is a set of wheels and an	4	4	4
959	2	. Of course he has further entries awaiting our perusal I am certain. No pride, no clue. # " And I am glad to hear that you are	4	4	4
960	2	Wright, who broke in as a feature director with his sterling literary adaptations of Pride and Prejudice and Atonement, both with Keira Knightley, cracks the visual whip in	4	4	4
961	2	and that God specifically approves of his activities. Isn't that the sin of Pride? A more reassuring stance would be: " I'm doing the best I	4	4	4
962	2	weakness of pride and vanity... submission maybe, but not a misguided vanity and pride which seeks to rule from blame and shame. # But when will it be	4	4	4
963	2	its independent thought, and i wonder how much money was spent to break that pride... bastages.... # ... interesting how that works out isn't it? If	4	4	4
964	2	I don't like pride. I believe pride is selfish. I believe that pride blocks you from seeing the truth. Some people think that pride is a virtue	4	4	4
965	2	to the DC area Thurs night and loved it. The bluegrass version of " Pride (In The Name of Love) " is f'ing brilliant. Also great version	4	4	4
966	2	used insulting terminology. # Now it appears to be an issue of pride. Pride is not something God likes or approves of. Many fellow Christians have called for	4	4	4
967	2	the breeze. We're supposed to invest that image with feelings of happiness and pride. # Nowhere are we told we can back up a step and realize that	4	4	4
968	2	smart, kind, pick the adjective, because MY children tend to love their pride fed. People don't mean to do this, feed pride, but it	4	4	4
969	2	others, deceiving others, destroying life, polluting life, living with arrogance and pride, using fear and intimidation to control others, etc. This is almost a	4	4	4
970	2	that you need to know about me, it's that I don't like pride. I believe pride is selfish. I believe that pride blocks you from seeing	4	4	4
971	2	else? Of course. BUT... that said, there is a thing called pride of place and we can all work towards that. # The reason so many	4	4	4
972	2	of the Federation of Black Prides and also a long-time board member for D.C. Black Pride. " To have a black president talking about gay issues and same-sex marriage,	4	4	4
973	2	turn around and lecture us about our rights and about our " democracy ". Pride blind the foolish. # Then their faith in God was destroyed, until their	4	4	4
974	2	fighter and i wouldnt be surprised if some of his fights were completely fixed as pride have had that reputation for their money maker fights so all you fedor keybord warrior	4	4	4
975	2	many f*ckin injuries from Pride fights, and not to mention they already aged. Pride fighters become champions in UFC, it just happen that the new fighters will rise	4	4	4
976	2	be utilized in a great many numerous mixtures when applied, yet is employed with pride. # When some sort of indexing situation is actually found or simply whenever the	4	4	4
977	2	being featured in high-profile, tier-1 Legacy decks. From now on, The Mongoose Pride Prize will award 1 tix (at SBenaBot) to everyone who'll just...	4	4	4
978	2	in society, and they're playing them with tragic gusto. # As with PRIDE AND PREJUDICE and ATONEMENT, Wright seems hellbent on avoiding costume-drama cliches. He's	4	4	4
979	2	look what you are president of, King of Babylon. Before destruction, comes pride and great shall be its fall says the Lord your God, in Jesus Christ	4	4	4
980	2	could visit them and be similarly insulated. Mr. Bennett had a man cave in Pride &; Prejudice (his library). My dad had a basement room where he	4	4	4
981	2	could be saved. # When Joey turned down a chance to take the police-sponsored PRIDE program, Stokes took him on with help from other counselors. PRIDE is a	4	4	4
982	2	without shelter, without power, without hot food are not the results to be proud of. # Get off the stage and into the streets. # The Jersey	4	4	4
983	2	recall I really don't know love at all # Tears and fears and feeling proud, to say, " I love you " right out loud Dreams and schemes	4	4	4
984	2	decisions in the crux of the moment. # In Pauli Murray's novel, Proud Shoes: The Story of an American Family, I became consumed less with the	4	4	4
985	2	for his radically idiotic, brain-damaging level of stupidity and ignorance. # unbiased and proud # All you two-party worshipping people are idiots. It's not about what club	4	4	4
986	2	to even be detached from the things that sustain a person's life. # Proud souls, with this virtue, can go to the extreme, that is,	4	4	4
987	2	large part to the ladies who have invested their time and efforts into bringing the proud sport back to Pepperdine. # Originally established on-campus in 1971, the program lost	4	4	4
988	2	" really " to the " proud. " Fwiw, she said only " proud. " # Watching the clip, I was struck anew by what a naturally	4	4	4
989	2	really sum up how I feel, one is the colors that fly high and proud the red, the white, the blue. The other ones got a rattlesnake	4	4	4
990	2	as we seem frighteningly close to WW III. # Ellen S - On " proud but wrong " - I hear you! After finding Rex's blog with the	4	4	4
991	2	is in respect to multicultural affairs and multiculturalism. # This week's reading, Proud Shoes: The Story of an American Family was quite a compelling read. The	4	4	4
992	2	days perilous times will come: For men, lovers of money, boasters, proud, blasphemers, disobedient to parents, unthankful, unholy, unloving, unforgiving,	4	4	4
993	2	single person to take in a foster child or adopt a needy kid. Feel proud, asshole. # ... and you know the sad thing? Dan just did	4	4	4
994	2	's something wrong with this. Left alone, be become weird, unbalanced and proud. # But look at our verses -- do you really believe with full assurance	4	4	4
995	2	they held toward gay marriage roughly a decade ago; As I watch this once proud and glorious land take more of a negative attitude towards God's chosen people,	4	4	4
996	2	trash and so my media trash would not immediately feel like used rubbers letting their proud lose of human rights as his personal mules -that gave pretext for the collapse of	4	4	4
997	2	" misguided " or " old-fashioned " is, in my mind, uninformed, proud or insensitive to the needs of many. # 4) A point that is	4	4	4
998	2	off her belly, a soft, clinging sheath in a stretchy fabric makes a proud statement. Dress don'ts: Avoid anything that's too constricting or uncomfortable, including	4	4	4
999	1	appreciative of freshwater, greenery and fairly extreme weather conditions.) Nor am I proud to be scared of almost everything, including but not limited to spiders, snakes	0	0	0
1003	1	Aerobic Dancer and have mastered many moves, but the one I am the most proud of is " The Monkey. " I have three kids. ALL FROM THE	1	2	0
1004	1	mean them. # That was beautifully written sincer words Jen. I am also proud of being part of friendship from my end of the world Canada. To all	1	1	0
1005	1	me? Here's your proof: An anti-Immaculate Reception post from Silver &; Black pride, published just two months ago. It's actually a pretty good read,	2	2	0
1006	1	local black LGBT activists say its effects will be palpable at this weekend's Black pride festivities. # It's debatable what led to the timing of President Obama's	2	2	0
1029	1	on the Eagles, stood at his locker and asked where the team left its pride, its heart. # And coach Andy Reid even tossed out " embarrassing "	1	1	1
1030	1	've been missing in an Internet media-sharing system # Today the Free Software Foundation is proud and excited to assist the GNU MediaGoblin project in its fundraising effort. MediaGoblin's	1	1	1
1031	1	Our award logo was a collaborate endeavor made with love that we are both very proud of. So without any further ado, onward to the details of the newest	1	2	1
1032	1	and mobile media, and who have manifested the behaviors of news disseminators, taking pride in their ability to break important news to their friends via their own social media	1	2	1
1033	1	. # Let Amigo Energy take care of your Plano power needs. We are proud to offer a range of high quality energy services for both Plano residences and businesses	1	1	1
1034	1	is not happening. Oh, that's pride, and Satan will be so proud of having locked you into it. # Frank # John200:disqus You are sounding more	1	1	1
1035	1	nerve to step in lives in our community. I am positive the community is proud of this person and I know the woman attacked is happy the neighbor was there	1	1	1
1036	1	Forklift Sales: Trained To Deal With Challenges # Toyota Lift of Minnesota takes pride in the knowledge and training of our sales staff. They are able to offer	1	1	1
1037	1	to a perceived insult. This was professional terrorism. # Comment Policy: We pride ourselves on having some of the most open, honest debate anywhere. However,	1	2	1
1038	1	others). And as I talked to the 25-year CO veterans and sensed the pride they held in having been there from the start, I felt a deep sense	1	2	1
1039	1	- with scratching, hair-pulling etc. And I have drag queen friends, they pride themselves on their ability to' fight like a girl'. # Not sorry	1	2	1
1040	1	our institution even offers a program that fits their interests. Our Graduate School is proud to start two new programs (The Doctorate of Nursing Practice and the Gerontology graduate	1	1	1
1041	1	. # As an event benefitting and supporting the arts, Shaw Contract Group was proud to supply EXPO CHICAGO with carpet for the event. " We partnered with Shaw	1	1	1
1042	1	3251441 Last Ounce of Courage Movie... Speaks to People who are Proud of their Heritage. # Like any message today that speaks of the United States	1	1	1
1043	1	Losses like the one against the Knicks on Thursday are deflating for a team that prides itself on closing out games like that. But, the truth is, fans	1	1	1
1044	1	and when natural childbirths don't happen, sometimes it's like the mom's pride was hurt, or like some kind of test was failed. When it does	1	1	1
1045	1	you do -- it's your work. It's important and ideally you take pride in it but it's not who you are. # I'm good at	1	1	1
1046	1	for his spot, " head coach Diljeet Taylor said. " He should be proud of what he accomplished here and this whole season for our program. " #	1	1	1
1047	1	about the pilots. " They were all comfortable with themselves. They weren't proud of themselves for beating up on an F-4. The goal was not to beat	1	2	1
1048	1	well, shine bright, and -- best of all -- make me feel constantly proud to be screwing the eco-nazis. Screw you, Al Gore! Keep your hands	1	1	1
1049	1	Luma to be a company that is artist-run. Our staff have a lot of pride in the work they do, continually innovating, and always pushing their creative limits	1	2	1
1050	1	Like this: About corncorps # As Illinois' corn farmers, we're proud to power a sustainable economy through ethanol, livestock and nutritious food. We love	1	1	1
1051	1	if it is the kid's parents doing it.) # I am more proud of my life as I have lived it than I would be if I had	1	1	1
1052	1	in Minnesota, where they belonged. The SWC imploded. The Cowboys were the pride ofDallas, an elite franchise with only a minor cocaine problem (and, at	1	1	1
1053	1	in school -- two places where books should always be readily available. We are proud to extend our partnership with The Heart of America Foundation and invite consumers to help	1	1	1
1054	1	choosen prior to the " debate ". People that will vote third party be proud of not falling for the BS of the Socialist Repub and Commie Demo parties.	1	1	1
1055	1	it and so did their father's fathers before them. They're rightfully proud of what they do. For others, it's the adrenalin and the danger	1	2	1
1056	1	the ratio on the iPad and it was one of the things Jobs was really proud of with the iPad. I liked the ratio on the iPhone screen as well	1	1	1
1057	1	Catholic, appalled and ashamed. And that having been said, I am also proud to be a rabid campaigner for NARAL and Planned Parenthood. And while Ireland will	1	1	1
1058	1	the killer along with the rest of us. He likes Lenam. He is proud to be a protector of such a fine business, so respected in Russia and	1	1	1
1059	1	let me tell you, let's be very clear: While Barack is very proud of all that we've accomplished together, my husband is nowhere near satisfied,	1	2	1
1060	1	identical amount will be disbursed to all ten. " # " He was very proud that he has amassed something to give to his heirs, " Ensminger said.	1	1	1
1061	1	. Aside from that, as a woman and mother of girls, I am proud we have add more female role models for them. Women do not need to	1	2	1
1062	1	I know they can look back on all the positive things they accomplished and be proud. This senior class meant so much to this program. " # Kimbro,	1	1	1
1063	1	our mobile apps or the next day? s weather. # We? re proud to be so integrated into your daily life and we work hard to earn our	1	1	1
1064	1	great ambassador for the Titleist and FootJoy brands, and in turn, we are proud of how our equipment has contributed to his success. We wish Rory all the	1	1	1
1066	1	taught me, some of whom were IFT members. # Teachers unions have long prided themselves as champions of free speech and academic freedom. But it appears they do	1	1	1
1070	1	sacrifices to protect our country and our freedoms. As a company, we take pride in supporting -- and thanking -- them both at home and abroad. # That	1	1	1
1071	1	're ahead of places like Afghanistan, but that's hardly something to be proud of when you're the richest nation on earth.) This is counterintuitive,	1	3	1
1072	1	# He actually believes Muslims have heeded those words. # " Islam has a proud tradition of tolerance, " he intoned during his 2009 Cairo speech. " Throughout	1	1	1
1073	1	three continents. " Smedley D. Butler, Major General # The Moosers have a proud martial history. My ancestors, for as many generations as we know of,	1	1	1
1074	1	choice. We do see a hint of color when defining the Peacock and her proud colorful feathers, but outside of this, the rags of dirt and clay coloring	1	4	1
1075	1	small. I am proud to be a strong constitutional conservative. I am also proud to have been married over 54 years to my wonderful wife, Louise. I	2	1	1
1076	1	today, I have decided to retire from CVC in January. I am very proud of what has been achieved in this time and I would like to thank CVCTs	2	1	1
1077	1	7 year old), with their arms around each others' shoulders, so proud of their lopsided tent. My dad said who's the little " nxxxxx "	2	1	1
1078	1	polished, finished products such as books, iMovies, and presentations that students are proud of and 3206623	2	1	1
1081	1	has taken over white America, and therefore, many white males now take' pride' --if you can call it that--in their dweebishness. White dorks think they're	3	1	1
1393	1	SandRidge Vice President of Communications and Community Relations, Greg Dewey. " SandRidge is proud to be a part of the downtown community and participate in Downtown in December.	1	1	1
1394	1	understand that because you are very much involved in this and in many ways quite proud of what you do. But I think you need to understand how the majority	1	1	1
1395	1	and finished second in receptions. # The biggest point is how Niner fans were proud to have the first ever 1,000 yard rusher/1,000 yard receiver in NFL history when Craig	1	2	2
1396	1	the possible introduction of nuclear power. # Nuclear Safety and Security # We are proud to celebrate the 50th anniversary of the IAEA Safety Standards programme. Safety and security	1	2	2
1397	1	only perfect team in NFL history, an achievement our players and coaches rightly are proud of. " Comments # Troy La Mana # The ONLY reason Miami could	1	2	2
1398	1	Kelly. My faith in his parents has skyrocketed. # Scott Service: The pride of Aiken High School and sadly the second-best batteryman named something like Scott Service in	1	1	1
1399	1	, our infrastructure is in shambles. # All over the country, our once proud cities are being transformed into hellholes. # There are dozens and dozens of economic	1	2	2
1400	1	fait accompli during the 2000 primary season, and taste-makers in the conservative movement remain proud of having launched Sarah Palin's career in national politics. Either the elites on	1	2	2
1401	1	worried about being able to access or afford the care they need. Democrats are proud to have worked hard to pass this landmark legislation in 2010 and of our efforts	1	2	2
1402	1	is better and your better is best. " # We at The Guilfordian are proud of our weekly paper. We stand behind it. We love it. We	1	2	2
1403	1	together and that bad things can happen anywhere. Why are the Republican Governors so proud of slashing Medicaid? Why are we racing to be last in the health olympics	1	1	1
1404	1	way!) and all the good things at the same time. I am proud to be even a small part of your world. # A growing number of	1	2	2
1405	1	anniversary logo. # " Breitling is a venerable, family-owned brand that we are proud to have built a strong relationship with over the past twenty years, " said	1	1	1
1406	1	openly LGBT folks from every party, in every level of government. We're proud to see representation becoming more diverse with each election year. We now have more	1	2	2
1407	1	, Steve, Sam -- and all the guys behind the scenes. Be very proud of what you have been part of. We will miss it dearly. You	1	2	2
1408	1	WWE Superstar David Otunga: # " That's one of the things we really pride ourselves in, " said David Otunga, Harvard Law School graduate-turned-WWE Superstar. Otunga	1	2	2
1409	1	in our first full year as a non-profit, but none that we were more proud of than our new 3,000 square foot headquarters in Red Hook, Brooklyn. Over	1	2	2
1410	1	have made sure that these values remain steadfast to the core. He would be proud of the company EMS has become, and would be one of your biggest supporters	2	2	2
1411	1	forward, " away from the pits of cynicism and hopelessness. I was so proud to see so many young brothers and sisters in the long lines voting for the	2	2	2
1412	1	J.D. Williams of Liberty, who introduced himself as a Democrat who was'' proud to vote for Romney.'' # Williams was an unsuccessful state representative candidate	2	1	2
1413	1	# Hi Anna, you are my style hero and I'm always a bit proud when I discover something on your blog that I have too -- is that weird	2	1	2
1414	1	also. Many of you have sacrificed right alongside your hubbies and I am so proud to stand in the ranks with such a courageous group of women. Lastly,	2	2	2
1415	1	the Vagina Monologues that I went to a couple days ago, I was proud to see those women unveiling the truth about feminism/feminists. Debunking the absurdity that these	2	2	2
1416	1	is really getting into taking surveys. He is so cute. I am really proud of him. It is really quiet here. Hope to get Christmas decos up	2	2	2
1417	1	opinion about a coaching hire. The man is an ICON and I would be proud to shake his hand without a 100.00 dollar bill in it. # When your	2	1	2
1418	1	" Many of Montana's elected officials spoke out on this issue; I am proud to be among them. " # The letter can be found at this link	2	1	2
1419	1	spending on us. That alone is an amazing victory for us. I'm proud of my fellow activists that day for not backing down from the inferno of heat	2	2	2
1420	1	our Heavenly Father above for you and your special bright spirit. I'm so proud to belong to The Church of Jesus Christ of lds. I whant to follow	2	1	2
1421	1	, is that so many other artisans underprice their work horrendously. It makes me proud to see someone put a decent price tag on their work -- I'm shocked	2	1	2
1422	1	. # As I look back on my NMA/ AIIM career, I am very proud to say that some of my closes friends in this industry are chapter members that	2	2	2
1423	1	a lot to say about Rockaway and the rest of the world. I am proud to be a board member of Rockaway Civic Association (formerly Rockaway Park Homeowners'	2	1	2
1424	1	grassroots support. # AB: Oh my God, it makes us feel more proud of the show than we've ever felt, because the fans are being so	2	2	2
1425	1	could through the fits of giggles and tears streaming down my face. I am proud to report that my mother ALMOST shot Pina Colada out her nose. Well done	2	1	2
1426	1	be calling the foot ferries a waste of taxing authority. But he seems pretty proud of the billions the legislature approved for the deep bore tunnel and building the necessary	2	1	2
1427	1	I hope our Gary Miller will be there for his CA constituents. I am proud to say he has consistently voted to our satisfaction. Thank you # If they	2	2	2
1428	1	to attempt to exclude Chick-Fil-A; let the consumers decide). I am very proud of the state of Minnesota, where I live, for not only supporting Obama	2	2	2
1429	1	FROM KC. People here in Dallas where I live now, are proud... Proud to be Texans. There isn't the " civic " pride here for Dallas	2	2	2
1430	1	if Hitler was to see what Israel was doing to the Palestinians he would be proud whilst at the same time gobsmacked as to how Israel is treating Palestinians the same	2	2	2
1431	1	and not opinion-based (as much as humanly possible). There used to be pride in journalism as a profession. I wonder if thee still is. # mountaingirl08	2	4	2
1436	1	and elbow grease really don't cost that much, really. Personal responsibility and pride in your home cost nothing. Teachers actually work very hard, many weekends of	4	2	2
1437	1	say you lost a fight with a lawnmower! " said my foster mother with pride. # Although my social workers me as a foster kid in their notebooks,	1	2	2
1571	1	. Being the EU leader for RTA deaths is not something for Poland to be proud of. I hope they install average speed cameras everywhere. If they save lives	3	3	3
1572	1	. # The Bureau of Caucasian Affairs # United Native Americans (UNA) are proud to announce that it has bought the state of California from the Caucasians and is	1	3	3
1574	1	self interests. Persons who served out of patriotic fervor may be entitled to feel proud of their service. # As I've said, I'm proud of nothing	3	1	3
1577	1	lives on 9/11. With his wife Angela and their three children watching on with pride, Mike and his fellow heroes in uniform carry an American flag during the pre-game	3	2	3
1578	1	not have White Pride without fear?? Im not saying white Power, but pride of our ancestry and heritage... kinda like black people do without fear... They	3	2	3
1579	1	no longer feel that this is the same America that once swelled my chest with pride. The list is too long for this venue but Obama has so many disturbing	3	3	3
1580	1	George Bush, Wall Street and Coorperate america has not been listening. # ... Proud To Be An American " As any successful CEO will tell you, leadership,	3	3	3
1631	1	rights for same-sex couples to 200,000 African-American households in the state. (Baltimore Black Pride co-chair Meredith Moise was handing out these fliers on Election Day as she spoke with	4	4	4
1633	1	: peas, squash, avocados, blueberries, you name it. I was proud as could be, snapping up pictures of his cherub face smothered in green bean	1	1	1
1634	1	I hope, we're on a better path to a future we can be proud of. # It's truly bizarre. Their server is a bit borked right	1	1	1
1635	1	crime and poverty, due to an unwillingness to work and support their families with pride. # They have blown up our trains and turned our beautiful Spanish cities into	1	2	4
1636	1	the last moments of his life, and for that, you should always be proud. # It's a wonderful story. And I don't know why you	1	2	4
1637	1	to get anywhere. But he carried himself with that same dignity, that same pride in being able to provide for his family, that same hope that his kids	1	4	4
1639	1	Mike Tomlin said. " Casey is a guy that takes a great deal of pride in, of course, not being moved and maintaining an interior presence. That	1	1	1
1640	1	one day, and literally lay there and cried (if you knew my " proud " brother, you'd know how serious that is...) because he could	1	4	4
1641	1	lots of beads. After a while, the UU booth became a magnet for Pride attendees. Visitors not only received our' special' rainbow beads, but many	2	0	4
1642	1	to reach yet a higher mountain top. # Therefore, it was with great pride that I took my daughter to stand in that long line as I waited to	2	2	2
1643	1	the name calling stage of the campaign in August? Ugly. Are the candidates proud of the tone of the campaign? # *** McCaskill gets her man: Endangered	2	1	4
1644	1	do you look back on that record Infinite Arms? Well, I'm really proud of it. It's funny, as one of the writers, it can	2	1	4
1645	1	the current offerings: # Brand Value (Is this an innovative brand I'm proud to be seen with?) # Advanced Design (Does this brand set the	2	2	2
1646	1	preserve this historical record of the race; to arouse the race consciousness and race pride; to inspire art students and to give information to everyone about the Negro.	2	3	4
1647	1	she get away with her gaffe of the Underground Railroad. Seriously, a recently proud African American is so clueless to think slaves actually " rode " this railroad that	2	3	4
1648	1	great week to be an Angeleno. Now, I happen to be a proud Bruin. My son, Thomas, knew the Eight Clap almost before he could	2	3	4
1649	1	of Navajo people, " Shelly said in a statement. " They have brought pride to our Navajo people in so many ways. " # In honor of Smith	2	2	2
1650	1	constitutions prohibit taking private property without just compensation. # ? Today is a proud day for Texas landowners,? said Joe Parker Jr., president of the Texas	2	2	2
1651	1	amazing job that I know he will absolute thrive in. So so so so proud. # 2. My favorite thing about myself is... Probably that I have	2	4	4
1652	1	off. # http: **27;7910;TOOLONG mitteatsdicks # douchebag # Anon # As a proud Anon, this Anon believes it's access to exercise his/her free speech that everyone	2	4	4
1653	1	nation against the run while allowing 108 yards a game, take a lot of pride in putting the brakes on powerful attacks. # . # " We're built	3	1	4
1654	1	so let our " wise " Anglo-Saxon fools find out the folly of their own pride. # Again, the American public has taken this with barely a whimper...	3	4	4
1655	1	. " # In times of confusion and perplexity, the Tewahdo church and the proud history of Habesha civilization that sprouted from it has been my refuge. It has	3	3	3
1656	1	of allegiance to this great country, it is an assault to our dignity and pride. # President Obama, through a concentrated effort, has managed to make a	3	3	3
1000	1	her hair and addenda highlighter she took fro # her post office but did VFTW proud tonight. The judges were too judgey on vocals. She should ignore Demi's	0	0	0
1001	1	**35;2325;TOOLONG... Masuzyo Chirwa # Fedor comprted in pride in hs hey day. the pride heavywieghts were better then the ufc heavyweights and he beat pretty much all the ufc	0	0	0
1002	1	Sno Ballsr and Donettesr. Bread brands to be sold include Wonderr, Nature's Pride r, Meritar, Home Prider, Butternutr, and Beefsteakr, among others.	0	0	0
1007	1	Bradley shared time in net. # Merrimack Valley 2, Plymouth 2 # The pride (2-11-1) broke a three-game losing streak with a hard-fought draw against Plymouth (	0	0	0
1008	1	full action on June 11th at the Garden City Center in Cranston, RI proud proud! Jennifer # This past Friday I went with the boys to the Portuguese Social	0	0	0
1009	1	undergone the right of passage that is a home mortgage, I am neither house proud nor handy. As a result of 14 years of raising kids, I am	0	0	0
1010	1	# BigDaddyMMA # Your comment holds no weight, because during Fedor's prime, Pride had the best HWT fighters in the world. Asking him to maintain the same	0	0	0
1011	1	team win when they are fighting among themselves? Part of the problem is Siemens pride. Most of the top brass live in a world where they believe it is	0	0	0
1012	1	and his experimental group (and formerly Vernon Smith). We've got a proud L &E; tradition at Mason that boasts some of the greatest public choice economists of	0	0	0
1013	1	own words: # This website is hosted by Dimock residents and members of Dimock Proud, in an attempt to dispel rumors and bring to light factual data. The	0	0	0
1014	1	13 Responses to Embracing the past # The book we read this week, Proud Shoes: The Story of an American Family, begins with a quote from Robert	0	0	0
1015	1	# Surprise. Simon Snider was not home. His possessions were now under the proud moniker of " Semon Swider. " # Really? # And Mr. Swider was	0	0	0
1016	1	process PubChem is part of the Web 1.0 model. ItTs no issue for usweTre proud to be working under the same model as both efforts provide value. If there	0	0	0
1017	1	to handle a vehicle under varying conditions. Follow Us Musca Law Proud Members Of: # Hiring a Lawyer is a very important decision that you should	0	0	0
1019	1	business being blown out of proportion. And that isn't something that makes me proud. While I appreciate that it's an area where I can grow and learn	1	1	1
1020	1	The cinematography is quite nice, with enough bird shots to do a nature film proud (not all of the footage here was authentic -- some was spliced in from	1	1	1
1021	1	about it on this blog at the time, because I thought I was too proud. Instead, I vented through other more entertaining posts. But this is a	1	1	1
1022	1	thing... after they have exhausted all other possibilities. " I am not always proud of this -- but, historically, I think	1	1	1
1023	1	is in last place in the " big east " is not something to be proud of. all it does is defer from the real issue that is can golden	1	1	1
1024	1	this issue haunts me. I don't look back at my naval career with pride, and it was my lack of courage in this incident that gives me the	1	1	1
1025	1	. Yet, the rich boastfully ride in ornate caterpillars, Donning agbada's with pride, posing as gods in a fading world! # There is a land- Where	1	1	1
1026	1	where israel putnam shot the last wolf in connecticut. he must have been so proud. of course, this was back in the 1742, when a wolf could	1	1	1
1027	1	brevity of a Irish barman. Well said. My Great Grandfather Danial would be proud. 31. Oct, 2012 / Anisa says: Wonderful job.	1	1	1
1028	1	that you got the kids all psyched up in advance. William Castle would be proud. # About the Author: A ten year veteran of writing for the web	1	1	1
1083	1	plant and pointed at it and said, this plant kills, and took great pride in shutting it down. And now suddenly you're a big champion of coal	1	1	1
1084	1	play political advertisements and discuss the Barack Obama versus Mitt Romney saga. I am proud to say that this election felt very much alive in political spirit between both parties	1	1	1
1085	1	decision to kill al-Awlaki. This is a flip flop that would make Mitt Romney proud. # and the democrats. Democrats like to parse the meaning of every word	1	1	1
1086	1	their porous secondary, and the Arizona State seniors should finish their home slate with pride. Earlier this season, Mike Leach referred to his seniors as " empty corpse	1	1	1
1087	1	soot, smoke and smog whose ruthless efficiency would make our old-school Captains of Industry proud. There is no such thing as reality-based community -- only a thunderous echo chamber	1	1	1
1088	1	If your teen is doing well, you are proud and want to share your pride, and also maybe a little bit of " see what a good job I	1	1	1
1089	1	, William Faulkner and Thomas Edison. She urges parents to consider a sense of pride rather than shame for their children who fit a different mold or no mold at	1	1	1
1090	1	residents and business leaders have talked about for 20 years. Today, I'm proud to give you a small preview of this building. Even before the doors open	1	1	1
1092	1	3201009 You're Proud To Own, We're Proud To Build! Main menu Post navigation	1	1	1
1094	1	Romney paid taxes at a rate of at least 13 percent. And he's proud to say s...... # ... Shoshanna's virginity on Girls. We were	1	1	1
1095	1	a black thumb, as I have no doubt told you, so am inordinately proud of having brought this plant from a years-ago $2.99 Safeway special in a teeny flimsy	1	1	1
1096	1	Mr Venus: You rate something AAA, when it is really A-? You proud of that little mistake? It's nothing to do with growing up, it	1	1	1
1097	1	pitfalls they may face such as crime and addiction. # Admit it and be proud to admit it. Do not think your own mistakes mean you have to turn	1	1	1
1098	1	yet. # What's your best gatekeeper tool? My iPhone. I take pride in responding to requests for reservations on my phone if someone emails me. It	1	1	1
1100	1	Claim Everything is strongly progressive in its viewpoint. The game and the author are proud of that, because it is their statement to the world about the world.	1	1	1
1101	1	10/9/12 7:22:07 PM # Nevermind, I found it. I couldn't be more proud that Alvey called me a " f**king moron. " That means that our opinions	1	1	1
1102	1	be certain of what is being sold. Like any product, find a craftsman proud of his or her work and eager to talk about it. # Mass food	1	1	1
1103	1	a chance, please go and look at my blog button, I'm so proud of it, and I'm going to add your button to my blog because	1	1	1
1104	1	of the 1930s? # PART VI THE PHANTOM OF RECOVERY " The WPA is proud that from the ranks of those who can't find jobs it can provide the	1	1	1
1105	1	to the petition or spew hatred toward entire sections of the country. # I pride muself on being consistent with the application of my personal values and principles. Sometimes	1	1	1
1106	1	it as a holdover from the excesses of modernism or something similar. They take pride in avoiding theory (even to the point of inconvenience) and they emphasize pure	1	1	1
1107	1	news on part of the society. All I clearly see is the Devil's pride here, Non Serviam. They've clearly missed the boat again. # And	1	1	1
1108	1	many men getting the ish stomped out of them or guns pulled on them over pride or defending the honor of a woman that wasn't their wife or long term	1	1	1
1109	1	, Nick logged 60 days straight at the Clairton Plant. " He was very proud of his job, proud of providing for his family, " Maureen says.	1	1	1
1110	1	**29;16498;TOOLONG # WordsFailMe # Both -- great thoughts insights-Thanks for being here! Makes me proud to be here # http: //boogieforward.us/ K-Bob # Those were excellent choices! Congrats	1	1	1
1111	1	interviewing her -- oh the irony. # sambarge said: " She seems remarkably proud of the fact that she doesn't agree with women who feel that they've	1	1	1
1112	1	That is only common sense to show ID. Be proud to have it and proud to show it. Can't have voter fraud when you have to show your	1	1	1
1113	1	a good hike, too -- just challenging enough to make me a little overly proud of myself for finishing -- didn't slow down Dan or MM at all.	1	1	1
1114	1	have watching the Ravens make a deep run into the playoffs would trump any additional pride I would get from beating a fully healthy Steelers team. # So your local	1	1	1
1115	1	cowed and cowardly population of any major city on the planet. The City lacks pride, its mayor is a weak appeaser and Islam, being a system that loves	1	1	1
1116	1	ratio adjustment. However, I know how easy it is to defend one's pride by writing that off as a " blind fandboyism " just because I really enjoy	1	1	1
1117	1	. I'm proud to be a man who works with children. I'm proud to be a man to talks about poop and pee and feelings and love.	1	1	1
1118	1	3241925 I will be a proud owner of an Toyota FR-S NEXT YEAR!: D # So I have saved	1	1	1
1119	1	experience that is important to you. What about this quality or accomplishment makes you proud and how does it relate to the person you are? # " Is there	1	1	1
1120	1	this week. Here's what she said about biosimilars: # I'm also proud that I joined with Senator Kennedy to author H.R. 3962, to create an FDA	1	1	1
1121	1	need to break this hardcoded messaging before helping fellow citizens becomes a source of personal pride. They don't get that you're only as strong as your weakest link	1	1	1
1122	1	making excuses for the guy. # Someone' claims' that we should be proud of these things. Hello, sir? Have you inserted your entire head into	1	1	1
1123	1	# Welcoming Dr. Willke? s announcement, Governor Romney said,? I am proud to have the support of a man who has meant so much to the pro-life	1	1	1
1124	1	fact most people do!! We have nothing to hide! Say it with Pride! # SoberThinking # I respect her stance... and it's for the right	1	1	1
1125	1	get involved in bastard affairs. The difference maybe is that he wouldn't be proud of it. # Bonne journ? e (sorry for not translated this message	1	1	1
1126	1	to be there for those who need them. I was also taught to be proud to pay taxes. You have to have them for a society. # I	1	1	1
1127	1	this community for so long. # Now their job is done. I'm proud to be among the first	1	1	1
1128	1	to the question, but if you are an advocate for breast feeding and are proud to bring your child to work with you in order to do so, WHY	1	1	1
1129	1	an organization as a business woman, and be able to create music I'm proud of has been tough, but inspiring, for me. To celebrate the strength	1	1	1
1130	1	opening a store. It only says that the city and mayor are indeed " proud " of their support for equal rights, in spite of Kathy's religious antipathy	1	1	1
1131	1	morning, and later that day I remember walking through the city and feeling so proud, like I'd crossed some threshold. It must have been visible, because	1	1	1
1132	1	Also Like About Me # I am the annoying happy homemaker type (and proud of it) who enjoys writing about her adventures with a husband inside a cottage	1	1	1
1133	1	first ones to get hooked up with Google's fiber-optic lines. The company is proud to say that they will be offering 1 gigabit-per second downloads and uploads. This	1	1	1
1134	1	costing the Republicans a majority in the Senate, then I hope he and his pride are happy with having effectively doomed us to Obamacare in perpetuity. # garfieldjl #	1	1	1
1135	1	making a tasty pink smoothie or beverage is a great way to show off your pride. Drinks like the Berry Vanilla Smoothie, pictured below, or this Lavender Lemonade	1	1	1
1136	1	think that " outbreeding " rationalists is some sort of extreme virtue to be inordinately proud of. Of course, I wouldn't expect a religious nutter-zealot to understand why	1	1	1
1137	1	race in a dead sprint. He crossed the finish line with a huge and proud smile; with his mama right beside him. # Jamie: so proud!	1	1	1
1138	1	brought down: # Ain't that something! # Hell Yeah, I'm proud. And maybe a just a little bit jealous too. How come the only	1	1	1
1139	1	Gail Collins # He must have missed something, because it appears that he is proud of his appearance. He posts the video on his Facebook page with the following	1	1	1
1140	1	your goals to pursue a formal education to someone like Brian. You should be proud of your achievements, just like those who accomplish their dreams and make a life	1	1	1
1141	1	could be his Achilles Heel where, his proverbial weakness that brings him down. Pride goeth before the fall? His children have good sense. I doubt he'll	1	1	1
1143	1	to this post shows how good you are. # 4. Metafilter has a proud history, in my own short stay here, of helping our members, as	1	1	1
1144	1	... this is life. Positive energy is a must in my world.... I pride myself on it. Thank you and may God Bless us all... # I	1	1	1
1145	1	, of course. Ideally, you could wear a thong and floss, be proud, feel powerful and everyone would respect your rights as a woman and a human	1	1	1
1146	1	Smith has found a few classifications she can live with. " I'm not proud to be female, " the author says, "... I am not even	1	1	1
1147	1	's happened over the past year? Well, that's easy. I feel proud, damn it, I do! I've made some fantastic new friends,	1	1	1
1148	1	possible distance, " Bickford said. # In that situation Perkins could still be proud his milk was going to a local producer -- even if all of it did	1	1	1
1149	1	has long been known to be Thomas Jefferson, and he was rightly so proud of it that he wanted his authorship of this document to be on his tombstone	1	1	1
1150	1	these days and they are there to help, not ever judge. Imagine the pride you will feel when you are free from your financial burdens. Take that first	1	1	1
1151	1	to make sure it doesn't. Disclaimer # The National MS Society is proud to be a source of information about multiple sclerosis. The comments, advice and	1	1	1
1153	1	and hear often. The Bully project is a truly noble project. I am proud to say I have donated and supported the making of this courageous and long overdue	1	1	1
1154	1	# As I stood there and listened to their memories... my heart swelled with pride because I saw in their eyes what I see every day in the Soldiers that	1	1	1
1155	1	really do hope that you check out the episodes, I have never been as proud of anything that I have created as I am about Relatively Prime. # Relatively	1	1	1
1156	1	is. These students are novelists before the 6th grade and they are all extremely proud of themselves. Please excuse their errors and let yourself... # In April of	1	1	1
1158	1	, I don't know, but I'll take pale any day and be proud of it! # http: //reallyhandmade.com Amy Alan # It is insane how I	1	1	1
1159	1	... even against stubborn, opinionated heel-diggers like me. Now that I am a proud pro-life feminist rooted deep in my Catholic faith, I feel compelled to share the	1	1	1
1160	1	the economy bad and well 12 yrs later Im still here!! I am proud to be a carrier. I am proud of offering service and providing my customers	1	1	1
1161	1	and then go through the family history. (laughs) " # (You proud of yourself for not picking up the Brad Friedel English accent?) " No	1	1	1
1162	1	the political consultants that designed those hit pieces. John Maynard Keynes would be so proud. # Oh, and the firm that designed those pieces: Lincoln Strategy Group	1	1	1
1163	1	no matter how painful. I wear that badge (or scar perhaps) with pride. # John Farrell 32: I think Michael Behe has been consistent in defending	1	1	1
1164	1	truly exceptional post. You are not alone in surviving and you should be very proud of your victories no matter how small. You have brought the conversation to a	1	1	1
1166	1	following suit. My body felt the exhilaration, the rush, even the pride of just doing it, and the emotional experience of fear took a dive along	1	1	1
1167	1	good, submissive Christian girl was supposed to do. Fortunately for me, my pride and ego wouldn't allow me to actually go through with such a ridiculous notion	1	1	1
1168	1	kids. That felt awesome. It is one of the things I'm most proud of doing... but still, I didn't feel like I changed the course	1	1	1
1169	1	the book -- where we find his final words expressed as fragments: # Always prided myself on my reasoning faculty and my stoic materialism. I don't have a	1	1	1
1170	1	I am told that my efforts are " hopeless. " Like those who were proud to stand up for what they knew was right to create our nation, however	1	1	1
1172	1	catch the issue early and deal with it well then and there. Swallow the pride, smile and see the issue from the customers perspective. And on a positive	1	1	1
1173	1	will find hand-picked gift ideas from companies and independent artisans that you can give with pride. The guide provides the conscious consumer with a place to find items that support	1	1	1
1175	1	intensity of the criticism is over-the-top. Yes, I do take a lot of pride in my work and I do believe it takes a lot of practice to be	1	1	1
1176	1	big enough to read it and understand it I won't be ashamed but rather proud as how I felt and wrote about our end. # A few months ago	1	1	1
1177	1	made money off my writing ability in multitudes of manners, and I'm pretty proud of the amount of writing I can accomplish in a relatively short amount of time	1	1	1
1179	1	gave silva his best fight, and Anderson Silva's only career losses came in Pride. Nogueria was briefly a Ufc interm champ and beat coture. Keep your b.s	1	1	1
1180	1	. This is a personal project for Leslie, so she's torn between her pride at April's progress and her affinity for getting the job done, any and	1	1	1
1181	1	. # 5. " Democrats are beyond identity politics ". The Democratic Party prides itself on inclusiveness and dreams of a world in which individuals are judged by their	1	1	1
1182	1	... the rebel streak in her was fading fast. # She shucked off her pride and trooped on toward the V.I.P. Lounge. A row of four-foot-high modular partitions had	1	1	1
1183	1	on Thursday, November 15, 2012 # Southern Air, what are you most proud of about this album? # I think I am most proud of the journey	1	1	1
1184	1	Annarino, November 9,2012 Team, This victory is a testament to you. Take pride in your hard work over the past 18 months: the countless calls you made	1	1	1
1185	1	" Blue (da ba dee) " on it. # I'm kinda proud to say it was Little Earthquakes by a certain miss Tori Amos... She's	1	1	1
1186	1	. # Which is a bit of an arse as I know Rasp and Peaches pride themselves on an Ad Free site to prove that no one here does any of	1	1	1
1187	1	on the planet. # " There are a lot of things I'm really proud of. We've revolutionized the fight business. We've done things in the	1	1	1
1188	1	" she said. " And these men are doing it.... They're proud that they're forward-thinking and modern enough to look past this misogynistic attitude. "	1	1	1
1189	1	, in chasing down those ripped and rowdy perps on the loose. # Although priding himself on his nearly psychic gift of discerning what's going down inside those criminal	1	1	1
1190	1	, " I wish I'd written a more critical book. " He was proud, then and always, that he had said this. It was the truth	1	1	1
1191	1	But someone's made an ass of themself, and I wonder if they feel proud. # This basically laid out everything I don't like about the Twilight series	1	1	1
1192	1	he wrote Orion and his wife, Mollie. " It is nothing to be proud of but it is my strongest suit. " # On March 5, 1866	1	1	1
1194	1	authentic moment recently, and not the kind that makes one feel a swell of pride in who you are. In a moment of overwhelm -- physical and emotional overload	1	1	1
1195	1	these smaller goals -- but they do get done and it is something to be proud of... # Today I am submitting an abstract for a conference and tomorrow I	1	1	1
1196	1	nab him the strap, but it will also give him a boost to his pride. Truth's former partner Kofi is the reigning Intercontinental Champion. It must be	1	1	1
1198	1	, and better the chances of your team being eliminated earlier. # Swallow your pride because it's just ludicrous. # My pride would come in knowing that the	1	1	1
1199	1	sad, especially since I fought so hard to get my MBA and am so proud that I finally did. My dream was to be a controller or a CFO	1	1	1
1200	1	it amazes me a lot more than the shock of them not! I'm proud of my interpretation skills because I was pretty sure he said " I like it	1	1	1
1201	1	' That is because amongst them are priests and monks, and they are not proud. " Qur'an 5:82 # And if they incline to peace, so you must	1	1	1
1202	1	different person now. I find it hard to accept that someone as stubborn and proud as House would embrace being a drug addict again. Furthermore I don't see	1	1	1
1203	1	It's a whole new twist, my friend. No, I'm really proud of it because the irony is doing a green-band trailer is kinda hard. We	1	1	1
1204	1	every time. Thank you for making me feel that I have permission to be proud of that. Stacey recently posted.. The Guest Room # As a seventeen year	1	1	1
1205	1	she didn't! # The Colombian beauty added: # " I'm very proud of my body and the way I look. I would be ungrateful to be	1	1	1
1206	1	to where he was today. It was a special day, and I was proud to be an observer. The Valley has been coming alive, and I know	1	1	1
1207	1	to constantly work to secure appropriate financial support. I am a classical musician, proud to be one and never regretted becoming one; always eager to face new challenges	1	1	1
1208	1	too. Ahem. # I used to be a nail-biter. I'm pretty proud my nails are long and strong, now. But, sometimes, I ca	1	1	1
1209	1	ask if she need of couse shes going to say no she had alot of pride and did everything for that lil boy. she would try giving money bc i	1	1	1
1210	1	rocketed the Flex to a 12.89-second quarter mile time at 108mph. Stachlewicz is very proud to say this is the fastest ET for a Flex that he's found reported	1	1	1
1211	1	to have jeans that fit at the waist, and accent areas that you are proud of. As stated before, you don't have to pay a heft price	1	1	1
1212	1	. It was never pretty, but it was highly effective. Coach took tremendous pride in that reputation, and it was a message he imparted on all his teams	1	1	1
1213	1	evolved to be where I am? Gosh, that's sad. I'm proud that I'm growing and morphing and adjusting and becoming a new person with every	1	1	1
1215	1	! I don't understand the PTSD comments because all Vietnam vets should be real proud. I'm proud that I served. A lot of people question me about	1	1	1
1216	1	to get a letter in golf of my junior year. While I am very proud of my club activities and my participation in my school's orchestra through out my	1	1	1
1218	1	stark-naked tourists are " undermining the neighborhood. " # Thus, a city that prides itself for its tolerance must find a way to police those who visually assault fellow	1	1	1
1219	1	When the choice is between preserving old buildings and allowing change in a city that prides itself on being dynamic, I'll side with change -- because that change is	1	1	1
1221	1	we can uphold. How can he say this when another thing that the party prides itself on is being the only party to have costed policies? We had a	1	1	1
1222	1	doubt influenced by travels to Europe and the formal gardens there. # The Biltmore prides itself on historic accuracy in the house and gardens. When the formal gardens were	1	1	1
1223	1	of their largest funders. By a lot. # But in a city that prides itself on creative innovation, it's also clear that up-and-coming artists are being squeezed	1	1	1
1226	1	instead accusing it of being run by oligarchs by stating: # " The west prides itself that it is the standard for the world, that it is a democracy	1	1	1
1242	1	there are many rewards of a little free labor. We attend an institution that prides itself on service and community involvement -- your options are endless. So, if	1	1	1
1247	1	rate tutorials for Web 2.0, email and online-marketing issues. # Mixx: Mixx prides itself on being " your link to the Web content that really matters. "	1	1	1
1254	1	? # We have some hints. I think we are learning that he is prides himself on outreach to folks of all political stripes (regardless of outcome).	1	1	1
1256	1	the lobster, perhaps he comes to get down with regular Joes -- Basil's prides itself on being a place where " sailors party with business moguls, fashion models	1	1	1
1260	1	and once more exemplifies the reckless abandon with which the North American horse racing industry prides itself on. # To even consider using these two drugs together in the performance	1	1	1
1265	1	rather than strong arm tactics to enforce vaccination seem more appropriate in a country which prides itself on protecting individual choice. When it comes down to it, vaccination should	1	1	1
1271	1	3234850 # The University of Virginia prides itself on trust. But a bike lock is still cheaper than a rocking chair	1	1	1
1277	1	touring from the streets of Athens to the Everglades of Florida. The group also prides itself on playing fast bluegrass and singing " dirty " harmonies. # However,	1	1	1
1278	1	# My friend, this is a country where in its largest city- one that prides itself on being far to the left of the rest of the country- cops are	1	1	1
1280	1	!? # It is unnecessary to ask for fast publication. The Nature Group prides themselves on haste, as evidenced below. Since this was a letter, the	1	1	1
1292	1	, is your research seriously based on a set of menus? I thought Gartner prided itself on their research, deep conversations with customers, reviewing detailed product plans?	1	1	1
1314	1	http: **35;3159;TOOLONG asmallcontempt # The church I attended when I was still a believer prided itself on giving a significant percentage of it's tithe-dollars to mission work (it	1	1	1
1319	1	High Intensity Training) as they can possibly handle. # The Management has always prided itself for the amount of SHIT it gives towards it's staff personnel. #	1	1	1
1320	1	and researched, such a low number may be a surprise. I compensate by priding myself not only with the knowledge of more esoteric films (everyone's seen #3	1	1	1
1321	1	flagrant, physical sexual harassment in any other business, Anna stuck through it, priding herself on her ability to talk a path out of a " bad situation "	1	1	1
1322	1	# This morning, as I rushed out of my hotel room, I was priding myself on traveling light. Sure, I had a backpack for clothes and other	1	1	1
1323	1	find the headline of this article somewhat offensive. It implies that this school is priding itself in not having as many white students as it previously accepted. # 17	1	1	1
1339	1	audiences all around the world on personal branding and why people buy. Among my proudest affiliation is that I teach at UCLA Extension, where I enjoy sharing what I	1	1	1
1344	1	" success " of the government takeover of the auto industry as one of your proudest accomplishments. In 2010, you bragged that " American taxpayers are now positioned to	1	1	1
1347	1	As the recipient of a string of awards, what would you name as your proudest achievement to date? # My proudest achievement is undoubtedly being the first Kerryman to	1	1	1
1363	1	just slightly uncomfortable when I ask them which of the company's movies they're proudest of artistically. # After a noticeable pause, Rimawi says that while a handful	1	1	1
1370	1	the 1928 Lima South High School football team. # One of my Dad's proudest accomplishments was being captain of the 1928 Lima South High School football team. Dad	1	1	1
1375	1	frustrated I usually threaten to run screaming into the street. It's not my proudest thing, but at least it's not violent. # Yo. I have	1	1	1
1385	1	London Olympic Games were truly remarkable, and will go down as some of the proudest moments of my life. " # IOC President Jacques Rogge said: " I	1	1	1
1386	1	let go of it once and for all. What is Le Clown's proudest blogging moment? # My experience as a blogger on WordPress.com has been a very	1	1	1
1387	1	he believes is his ability to connect with the world. " One of the proudest things of my three years in office is helping to restore a sense of respect	1	1	1
1389	1	. Republicans, by contrast, are burning to fire Obama. They are also proud to support an articulate, experienced and honorable man whom they genuinely believe has what	2	2	2
1390	1	take note that not many athletes in this city have given us something to be proud of when Atlanta professional sports are mentioned. (Henry Aaron being the first)	2	2	2
1391	1	you we talk about it, we tell him weekly, maybe more, how proud we are that he came back to us. We say, " remember when	2	2	2
1392	1	to put food on the table, and that's what counts. They're proud, and there's a real sense of energy out there. But it's	2	2	2
1432	1	is April 15. " ****** " We will always remember. We will always be proud. We will always be prepared, so we may always be free. "	2	2	2
1433	1	of women who have bought into the idea that objectifying themselves is a source of pride and power, but the fact that they fail to see just how limited women	2	2	2
1434	1	works. This makes me very proud, as it makes me feel like a proud poppa in many ways. # Its also satisfying to see how many of my	2	2	2
1435	1	being part of a team, and it in no way diminishes the joy and pride of actually being first (winners and star players get bigger trophies, advance to	2	2	2
1438	1	Paul Simon, Meryl Streep, Frank Sinatra, Buzz Aldrin... We should be proud. # Hurricane Sandy and what it did to the Shore stirred up my Jersey	2	2	2
1439	1	failed to make a friend of our most mortal enemies. Certainly nothing to be proud of, but nevertheless sadly TRUE! # We are a dullard, selfish,	2	2	2
1440	1	regions they will NEVER see the light! Even if they did they are too proud to ever admit that the conservatives and Republicans were right. We are being taken	2	2	2
1441	1	money. It would just miss all of our money. # We lack civic pride these days, which is really the issue. You can more easily justify making	2	2	2
1442	1	whether they're your own child or not, and feel a sense of Parental Pride? Well, I feel that way about Joe and Tom, the co-owners of	2	2	2
1443	1	K didn't share in my work, but it's okay. He feels proud of all I do though. I will share bits and pieces. I will	2	2	2
1444	1	. I have never been more confident about our team -- as well as more proud of the work we have done in the last month. It's okay to	2	2	2
1445	1	Yeah, everyone thought the election of a black man would send all the self-admitted proud racist neo-nazis into hiding, and the closeted ones would learn the error of their	2	2	2
1446	1	I have worked with in the past five years. Everyone has said they're proud of us, and I'm proud of my staff too. We have no	2	2	2
1447	1	at the respect they have shown during debates one and three. I feel so proud of both of them! I know I couldn't sit there and hear the	2	2	2
1448	1	help so many people. I have never met you, but I am so proud of you. Your daughter is very lucky to have you as her mother.	2	2	2
1449	1	a really good performance by the team, " Eyestone said. " I was proud of our guys and the way they rose up. If you run at the	2	2	2
1450	1	incredibly intelligent, but they are gifted in different ways. They make me very proud. # For one, homework actually was play, for the other, it	2	2	2
1451	1	an immense emptiness though. # So sorry you were hurt by gossip, but proud that you are choosing to rise above! Maybe you need to add " strong	2	2	2
1452	1	and Auburn, third one a senior in high school. He would be very proud of them. We all still miss him and keep his memory alive. We	2	2	2
1453	1	think of any more depressing organization than the current Roman church! I am SO PROUD TO BE AN EPISCOPALIAN! As my 75 and 78 year old parents said when	2	2	2
1454	1	am NOT ASHAMED of her and I am NOT AMSHAMED of you. I am proud of you both for fighting your way back up from the pits of hell each	2	2	2
1455	1	early voting center at the Tivoli student center on the Auraria campus. I am proud of the 10 of us for our collective professionalism (though we're amateurs)	2	2	2
1456	1	remaining games but I'm not saying that we won't. We will be proud of this team for their pride and perseverance and I think that this has matured	2	2	2
1457	1	all the **28;11049;TOOLONG. # Keep cheering for your favorite team. I'm a proud Android fan, myself. But keep in mind that when the dust settles,	2	2	2
1458	1	He's working every day to have these kinds of games and we're very proud of him. " # MARC BURCH, Sounders FC defender # (On his	2	2	2
1459	1	a warm community. # What a beautiful tribute Kristen!! I am so proud if what our community has done, and now I believe that with a little	2	2	2
1460	1	before it starts -- nice -- I'm sure our forefathers would be very proud... # November 17, 2011 at 11:47 am # nyc73 # This is one	2	2	2
1461	1	you. Cris recently posted.. My New Years Story # Jenny, I am proud of you for writing and posting this. I have been an admirer of yours	2	2	2
1462	1	.. The flooring reveal # CONGRATS on the big FOUR!! I'm so proud of you and know you will make it for the rest of your life!	2	2	2
1463	1	by now? # Mitt shows for truth and honesty. His father must be proud of him. George Romney is still highly regarded in Michigan and won reelection twice	2	2	2
1464	1	much out there about her. She is a wonderful caring mom who is very proud of her daughter. But I probably limited her based on the questions I asked	2	2	2
1465	1	proudly with Red State, Fox News,..... Sarah and Michelle...... Signed: Proud to be from MN's 6th District, Land of Michelle Bachman # cowatchman #	2	2	2
1466	1	thought he would be a great fit in the Dyn culture. # We are proud of our culture and ensuring new employees understand it, embrace it and enjoy it	2	2	2
1467	1	reaching the hard working American voters prior to the November election. " We're proud to be part of NASCAR and this opportunity to reach millions of voters who share	2	2	2
1468	1	. It's how the whole group operates together. They have a lot of pride in that group and, like I said, it's been a big thing	2	2	2
1469	1	Brooklyn, the Bronx. People in NY have continuous international influence and they are proud of their city. Seems like Detroit people have become lazy and expect the governments	2	2	2
1470	1	15. Jyotsna Arora said on Oct. 7, 2012 # Way to go. Proud parent of a current student at UT!! # 16. Rasul said on	2	2	2
1471	1	and some other tribes) melded into my DNA over the centuries. I am proud of the things I have learned about my ancestors - but NEVER would I try	2	2	2
1472	1	summed it up beautifully. The man's not perfect, but I'm so proud to have him as our leader. # I saw something beautiful Tuesday night:	2	2	2
1473	1	or adults. We see a bright future ahead of Maya and we are very proud of all the choices she makes. TLC congratulates her! # Congratulations Maya.	2	2	2
1474	1	of the day. It stretched us to the max, but I'm so proud of them. " # The filmmakers were extremely happy with the transformations the art	2	2	2
1475	1	# Is my dad proud of me? Of course he is. He is proud of all of his children. # He is an engineer's engineer. He	2	2	2
1476	1	many areas, it's still good publicity for Kaspersky. You guys should be proud of having such a prominent story. Most people who read it will walk away	2	2	2
1477	1	in front or behind us, which can makes exiting school quite challenging. Very proud of her (and her new friend). # What a lovely day Jeannette	2	2	2
1478	1	, Dave, now a science teacher at North Medford, indicated he was mighty proud of his grandpa. # " Not only could he keep up physically, walking	2	2	2
1479	1	for' local' sharing their passion and finds with you. I'm extremely proud of what we've created, together, but I don't want to just	2	2	2
1480	1	Prague later this month for the Partners in Learning Global Forum, and we're proud to share her story in today's Daily Edventure. # How did the environment	2	2	2
1481	1	dad. And I certainly think a father, adoptive or biological, can take pride in his son's work. I'll bet Floyd appreciates having someone cheering for	2	2	2
1482	1	. From the outside looking in, it just doesn't seem like Fab is proud to have her on his arm. I know everybody expresses their love differently but	2	2	2
1483	1	20+ km track often considered as a benchmark in the industry. " We are proud of the work of our students, and we are glad to contribute in the	2	2	2
1484	1	names on the back of the jerseys beginning this season. # " I'm proud that our players want to be part of the university's efforts to help victims	2	2	2
1485	1	technologyis one of the areas that interests me a great deal. As a proud new owner of an ipod Touch I am amazed at what I can learn just	2	2	2
1486	1	stone or of a bit of earth, but every one will be happy and proud that he is the real possessor of the pearl. When, however, night	2	2	2
1487	1	Your Mail Address About Hollie Schultz # Baby Gizmo founder Hollie Schultz is the proud mom of three adorable kids. This certified CPS (Child Passenger Safety) Tech	2	2	2
1488	1	is no such thing as a perfect candidate or a perfect campaign, I was proud to vote for Mitt Romney and Paul Ryan. In fact, it was the	2	2	2
1489	1	$25,000 this year? Good for you, sir! Your family must be so proud: you no longer qualify for assistance, but now you don't need it	2	2	2
1490	1	, and he was paid to build a program that would win. I'm proud that he mentored his charges so well, but I don't believe he was	2	2	2
1491	1	that differences are what make the world a cool place. We should all be proud of our hertitages and colors and foods and what not and still enjoy each other	2	2	2
1492	1	A friend of mine who was Dominic's student tells me that he is very proud of his ancestry and likes to tease his students about it by saying for example	2	2	2
1493	1	! # I met LC at the first Rainmaker event in San Francisco and am proud to call her a friend. I have yet to meet a member more passionate	2	2	2
1494	1	, I couldn't believe it, " Trifone said. " I am so proud of them. We've been all about team throughout the season. It took	2	2	2
1495	1	to Alabama for my little brother's graduation from nursing school. I am so proud of him. He is just 22 years old and is a very smart and	2	2	2
1496	1	We entered this public office as a family, and I couldn't be more proud. # When I was a kid, Denver was a much different place.	2	2	2
1497	1	the air was " We Take Care of Our Own ". I was so proud of President Obama, his family, his campaign team and of the merits of	2	2	2
1498	1	sure she brings a lot of joy to your lives. # You should be proud... this child will always open up to you and tell you what she thinks	2	2	2
1499	1	me admire you, and I know God is smiling upon His child and is proud of you. # Today, I hope you experience great joy from our Heavenly	2	2	2
1500	1	with his stuff as he took the plunge. Sitting there, I felt how proud parents must feel as their child bravely tries their hardest with absolutely no visible signs	2	2	2
1501	1	in California, swallow tattoo meanings often symbolize returning home, or a sense of pride in both your people and where you come from. # He's proud of	2	2	2
1502	1	attacking our attackers. We can win by steadfastness and continuance, making our father proud of how we stand up in his absence. " # " So let Valeriy	2	2	2
1503	1	ranch use the n-word all day long... he comes home super-frazzled. I am proud to say he's a 100% Obama supporter now. # Can relate. In	2	2	2
1504	1	could have been more than a peaceful protest. # Classy. Parents should be proud. Where do you stop it? Maybe next year we can have a "	2	2	2
1505	1	Jay Caspian Kang says something to this effect in his Grantland article: " The pride we feel over Lin's accomplishments is deeply personal and cuts across discomforting truths that	2	2	2
1506	1	, hearing that they are kind and compassionate human beings, makes me the most proud. # ***** # Increasingly I look around at the world and wonder when making	2	2	2
1507	1	a girl, and it accidentally went to my Mom. I think she was proud. " # 7. Reverse Psychology II. # " I'm glad you	2	2	2
1508	1	and drove back home the same day. # You just got ta' be proud of that NJ union for having their set their priorities straight. And as all	2	2	2
1509	1	giving away your work dewflirt. That's the thing to do. I'm proud of you. I'll let the Red Hot Chili Peppers speak for me -	2	2	2
1510	1	Rendon said. " They were mentally prepared and that is what I am most proud of... We talked about how Cathedral would get its big shots and if you	2	2	2
1511	1	) to help in that regard, and NASCAR president Mike Helton said he's proud of the way the drivers make themselves available given the demands on their time.	2	2	2
1512	1	for exactly for that reason. # Becky, you really made all of us proud, by taking initiative to bring a change to the lives of others. You	2	2	2
1513	1	from throughout the region. Bass Pro Shops is committed to Bridgeport and we are proud to have them as a major anchor tenant at Steelpointe Harbor. " # On	2	2	2
1514	1	expressed similar desires when I was younger, I just wanted to make my dad proud but, like you, my dad wasn't the' affectionate' kind.	2	2	2
1515	1	teachers I dearly loved, respected, admired and did my best to make them proud, I had some teachers that were absolutely horrible. One of the worst it	2	2	2
1516	1	and may his son Laird be forever proud of his Dad just as I am proud of him and becasue he himself has paid an enormous cost for the safety and	2	2	2
1517	1	for me, he is the only candidate in 6 presidential elections who i was proud to support and VIABLE dammit. so close. this was the first time that	2	2	2
1518	1	Michael Faust, Lorenzo Albala, Grigorios Papadourakis and bow Brian McCabe. Savell was proud of all of his athletes and their ability to execute the strategy they have established	2	2	2
1519	1	especially young Blacks) see in Obama? They saw someone that they could be PROUD about, someone who was articulate, educated, someone who had achieved material success	2	2	2
1520	1	the family and particularly for James, " Mahone said. " We're very proud of him. We thought he did a wonderful job, and its nice to	2	2	2
1521	1	. I am now controling it with diet and exercise. My Dr. is very proud of me abd has referred several patients of hers to SP. I hope I	2	2	2
1522	1	sorry that Clinton wouldn't be president, adding: " We're all very proud of you. " # My source refuted Rep. Brian Higgins' assertion that Clinton	2	2	2
1523	1	her degree (with a huge bang!) and I couldn't be more proud of her. It's amazing to see how far one can go with a	2	2	2
1524	1	uses it even today in her everyday work and business decisions. I'm super proud of my little Trekkie. She also loves Yoda too. She especially loves,	2	2	2
1525	1	ice cream, let's be real here # Oh Tessa. I'm so proud of you for coming to this realization that blogging needs to be put on pause	2	2	2
1526	1	shows that increased diversity has been coupled with high standards of quality. I'm proud to be the child of a white UT graduate and a Chicana and UTEP graduate	2	2	2
1527	1	# I'm proud to call Fi a friend of mine.... and I'm proud to volunteer alongside her as a Heartfelt photographer. Fi's article so eloquently conveys	2	2	2
1528	1	, of his daughters. Ann is a PhD in neuroscience and Beth is the proud mother of his grandchildren, Evan and Elijah. Time to take a stand	2	2	2
1529	1	's offices and communities. Kate lives in Charlotte, North Carolina and is the proud mother	2	2	2
1530	1	and Dolphins leaves us only our beloved U to cheer for, and to be proud of. # Reasons to self impose- # To offset the severity and/or duration of	2	2	2
1531	1	Those are GREAT things to WONDER about phobias, Team Wilch 22! We're proud of you! We're glad you learned some cool facts about phobias by exploring	2	2	2
1532	1	him. But rather than show that he'll buck politics in order to stand proud with his wife, he cowers and runs away, embarrassed and ashamed of tag	2	2	2
1533	1	haired man, and that big infectious childlike heart of his. I am so proud of you, of him, your family and the legacy of love that you	2	2	2
1534	1	fans, central California being no doubter Giants country, wearing their team gear with pride and rooting loudly. So we decided to kick it in the bar and catch	2	2	2
1535	1	I was only wearing socks. But all in all, I think she is proud of me, and one day will think back on her mother who was a	2	2	2
1537	1	from there feels that LGBT students deserve to die simply because they exist. Elon prides itself in saying that it is safe campus and that they welcome people from different	2	2	2
1547	1	conditions indicated there applying once again. Anyway, this proud Iowan has never been prouder of his home state. 5 Comments # You can give a gift of	2	2	2
1549	1	have in the process. " # Second, " Nothing will make your parents prouder than to stand before the throne of God and hear Him say to you,	2	2	2
1554	1	that actually came together. " # Head coach Tom Lyons couldn't have been prouder of the way his team performed on Saturday. Marking an end to an incredible	2	2	2
1555	1	my little pinata was a colorful beacon of silliness. I couldn't have been prouder! And the kids at his school were awesome. He's at that age	2	2	2
1561	1	is not acceptable. # I was proud of myself for confronting him and even prouder of Linda and her boyfriend -- when upon hearing about the incident (I did	2	2	2
1564	1	others do it for me, last weekend my daughter had cheetos, not my proudest moment. And sometimes, like in this post, your kids do something before	2	2	2
1581	1	honestly, this is just plain nonsense! We are a democracy and should be proud that we have the right to vote; many countries do not! I do	3	3	3
1582	1	's not around, so someone else has to take the mantle. Some other proud American has to tell this country what it needs to hear. Everyone else is	3	3	3
1584	1	For me, it is so easy: # In Taiwan, you are not proud of being called " Chinese Culture ", even you do nt like any thing	3	3	3
1585	1	n't discount pride. Pride is what inspires us and ties us together. The pride of the moon landing wasn't merely nationalistic pride -- the entire world took inspiration	3	3	3
1587	1	2011, the South American country selected the town for a campaign to promote national pride. A film crew and several Peruvian celebrities visited the Nebraska blip to film a	3	3	3
1588	1	gave everything. I supported his decision to do what he does. He was proud to be an American and be there for his country. How could I not	3	3	3
1589	1	now THAT would really just destroy my life and might make Michelle Obama, not proud of her country anymore for the 2nd time in her adult life. # Similar	3	3	3
1590	1	# 14.' Western civilisation came to this country in 1788 and I'm proud of that...' # 15.' There may not be a great job	3	3	3
1591	1	. # Congratulations for being a class act. You do both of your countries proud. # Don't allow the mixed reactions to diminish your joy. You set	3	3	3
1592	1	this country are confused about ethnic groups and revel in their ignorance. Many are proud they only speak " American " and know no other languages. We have a	3	3	3
1593	1	family units,' raising the barn' with his neighbours, and an alltogether pride of being an american. # this was replaced with a rapid cancerous growth,	3	3	3
1594	1	country lost their backbone and turned their backs on LIES and just gave up their pride in their self and their country? What ever happened to (A Country of	3	3	3
1595	1	. # I could not be prouder of you, and America could not be prouder of you. # This is pretty disgusting stuff. Their " country " did	3	3	3
1596	1	American Empire' because that implies that average Americans will somehow benefit by being falsely proud citizens of an Empire (like the British Empire or the Roman Empire) and	3	3	3
1597	1	" rise up my beloved people! the bandas are coming to take over our proud, ancient nation! " simply becouse the top positions are not held by his	3	3	3
1598	1	necessarily because of civilian death, but because drone campaigns constitute an affront to national pride when citizens do not see their own government solving its own problems. Elite-driven criticism	3	3	3
1599	1	him online or on TV. He shows what it's like to be a proud American who only wants to make things better for all of us here in this	3	3	3
1600	1	now be the last bastion of ethics and justice on earth. I would be proud to be called Israeli as I once was proud to be called, and to	3	3	3
1601	1	because it is our native land with a common history and culture. We are proud to be American. # Secession is a superficial, knee-jerk, dead-end reaction that	3	3	3
1602	1	8 of Junior. I don't see anything in that time period to warrant pride' in the country' in a comprehensive sense. # As to the point	3	3	3
1603	1	3) " This is the first time in my adult life I've felt proud of my country " - first time since 1981. Surely it's not the	3	3	3
1604	1	this fact and their opponents could not. # Here is a comment from a proud Israeli on a technical forum not long ago about those who tend to morph into	3	3	3
1606	1	than the expected behavior of citizens within a democratic society -- and Greeks are " proud " for having invented democracy -- it unfortunately is a canon in pursuing political ends	3	3	3
1607	1	, they were a great and historied American institution helping to define and lead a proud nation's landscape and will. One of the things he stressed, which really	3	3	3
1608	1	that choice is undesirable. This is one of the reasons that in America we pride ourselves in the right to choose our own adventure if you will. # However	3	3	3
1609	1	she said " for the first time in my adult lifetime, I am really proud of my country. " This means, for the 1st time in 25 years	3	3	3
1610	1	amazing to 3164031 Proud to Be an American: Free Speech # I attended two Veteran's Day programs	3	3	3
1611	1	n't mean I have to always be " proud " (let along " really proud ") of my country no matter what -- the idea of " my country	3	3	3
1612	1	makes life worthwhile. And it tells us everything about America except why we are proud that we are Americans. " # And if you compare that inverted pyramid to	3	3	3
1613	1	all " John " is a christian name. However; if you are so proud of your turkishness, why don't you call yourself Mehmet Talaat? # When	3	3	3
1614	1	just this, sets an example for the rest of the country and makes me proud to be an American. The press is billing this the Jersey " Bromance.	3	3	3
1615	1	some of us don't subscribe to the biggest tribe of all, I am proud to belong to the American Tribe'.. Doc Out # The tattoo phenomenon of	3	3	3
1616	1	Harvard -- is now just finding something about her country that she can be really proud of? This, the person who didn't know if she could support HRC	3	3	3
1617	1	. In other words, divest while there is still value left. # The proud American will go down into his slavery without a fight, beating his chest,	3	3	3
1619	1	themselves or their children harder. But why should they, in a country that prides itself on equal opportunity? # To bring up college admissions is often to be	3	3	3
1624	1	power to contribute to choosing their own fate. As a country the U.S. has prided itself on many things, one being the freedom we all enjoy. But it	3	3	3
1627	1	for Oxfam America. " The fight against global poverty is one of America's proudest traditions and smartest investments. Congress must protect these vital programs from cuts -- they	3	3	3
1629	1	their quest to claim the crown as next in line in the Western Conference's proud power forward lineage. # Just how long Aldridge remains alone at the center of	4	4	4
1630	1	ufc heavyweight champs from that period. barnett sylvie orlvlaski radleman big nog. infact pride had the better fighters when it was around. # krakrara # he never beat	4	4	4
1632	1	to generation. You have shown strength with your arm, * and scattered the proud in their conceit, casting down the mighty from their thrones, * and lifting	4	4	4
1657	1	your team gear Are you Team Edward or Team Jacob? Wear your preference with pride in the form of a T-shirt, button, hat or underwear! # Watch	4	4	4
1659	1	, but the nachas of an agency that can actually get something done. The pride we felt was the pride-by-proxy that we felt from sharing in the creativity and courage	4	4	4
1660	1	money making enterprise each year, the players still suit up and play because of pride. Pride they feel for the hard work they've put in, pride for	4	4	4
1661	1	. I saw how my father carried himself with that same dignity, the same pride that folks feel with the opportunity they have to provide for their family, that	4	4	4
1662	1	live with life threatening illnesses with confidence, pride, joy &; tenacity. So proud of you Jo! <3 # Yes, we should be thankful for every moment	4	4	4
1663	1	jerseys are consistent with NFL style. These two changes epitomize class, unity and pride, " 1997 graduate Mark Freed said. # It's unclear where the blue	4	4	4
1664	1	a link With Western Christian pride Professor Jenkins, I've got news No Western pride exists The West has no one in the pews And Marxism persists When Africans give	4	4	4
1665	1	, Italian-American, Japanese-American and this list goes on and no longer is there any pride, self-respect or dignity related to being an American citizen. I would be interested	4	4	4
1666	1	. Because of this, China Aviation Oil no grades complacency in the face and pride, but in the new economic situation, knowledge management and network technology, innovation	4	4	4
1667	1	dealing with the situation. This should have happened much sooner. Whether it was pride or over-confidence, I hope we see some international rules set in place at the	4	4	4
1668	1	a bad and worn out Chiefs team with nothing left to play for other than pride and money. The organization can say it isn't giving up, but it	4	4	4
1669	1	area (and closer to the train station), showing off their outfits like proud peacocks. # Takeshita Dori also has cafs, fast food outlets, a Hello	4	4	4
1670	1	many of the characters during war. Olanna is relieved to get a copy of Pride and Prejudice during their time in exile. # Half of a Yellow Sun is	4	4	4
1671	1	liddell) to compete in pride and he got owned # Triggerman99 # And every Pride fighter since then that has come to the UFC has gotten owned. # vincearizala	4	4	4
1672	1	the city. Now the union is playing the race game as well. Stand proud Mr. Vice president. Not only are you a vice President of the Union but	4	4	4
1673	1	the humdrum is futile anyway right now. # LEO (07.24-08.23) Partyhound, proud Lions think that they can go the distance, but now you must put that	4	4	4
1674	1	times in the last days. People will be self-centred and lovers of money, proud, haughty, abusive..., irreligious, callous, implacable, slanderous, licentious	4	4	4
1675	1	What a crybaby loser. On and on how badly he was treated in his proud list. Poor Victim. Reality was he was an hopeless drunk that caused all	4	4	4
1676	1	3173224 Pages Thursday, October 25, 2012 Proud Member of the Chevonnetourage # Craig and me with Chevonne putting our paws up before	4	4	4
1677	1	that markets operate based on very " irrational " things like fad, fashion, pride, hope, jealousy, prejudice, etc.. Did people start buying the Hummer	4	4	4
1678	1	Is total despair coming? # To have hope, let us get out from pride, hypocrisy, egoism, bureaucracy and arrogance. # To have hope for all	4	4	4
1679	1	country. It is a buzzword used in TV commercials and patriotic speeches. But pride isn't good. Those people who use the word often, confuse pride with	4	4	4
1680	1	in " and allowed members of the military to wear their uniforms in the Gay Pride Parade in San Diego July 21, 2012. It's a sign that the	4	4	4
1681	1	support gay marriage as a civil right should not automatically be accused of " pride, " " arrogance, " " inviting God's judgment " and " shaking	4	4	4
1682	1	have women as sex objects to be sold and marketed. New feminism is slut pride. Chicago has a big statue of Monroe as skank, and not a single	4	4	4
1683	1	again? # pagansister # There is a problem with being a champion of gay pride, wirewrapper? Gay people are people too. Nothing to be ashamed of --	4	4	4
1684	1	enough independents like us break for Romney with our votes? We can throw this proud socialist Obama scumbag out on his ass. # But being in California, I	4	4	4
1685	1	will meet in the center of the Octagon to battle it out with nothing but pride and legacy on the line. # Georges St. Pierre returned from injury to defeat	4	4	4
1686	1	wit and an indomitable will, never confused his mission with himself and never let pride overcome principle. This is also the story of a political pragmatist who knew how	4	4	4
1687	1	until a Quaker friend told him that there were people who thought he was " proud ". So Franklin added " Humility " to his list of virtues and began	4	4	4
1688	1	was " easy to be hard, easy to be cold, easy to be proud, easy to say no ". R.I.P. Troy and Officer MacPhail. #	4	4	4
1689	1	to get Cameron and Cuddy back. He would have to put his arrogance and pride aside. # I think it's quite weird to have a series finale without	4	4	4
1690	1	grief! # Whether you dust off your old cruiser or bring out your pricey pride and joy, we ride because we like to get people on their bikes and	4	4	4
1691	1	our lights under bushel baskets. We should take part in the Public Square as proud bearers of truth. We would be even worse off now if we didn't	4	4	4
1692	1	may find your sent items folder is the only to-do list you need. Proud sponsor of Iowa's largest Angel Investor Group Where Else I Blog # This	4	4	4
1693	1	trade into areas I know I don't belong. # Is it arrogance or pride? Certainly, this does play a role, but we know Pride goes before	4	4	4
1694	1	finished both Sylvia and Arlovsky in the first round. Couture ended up loosing to Pride Champion Nogueira. According to this information, one can safely say that Fedor was	4	4	4
1695	1	the rear and you have an out of control collection of uniform wearers with no pride except false pride. These guys will rape your daughter! Seems all the squared	4	4	4
1696	1	. # It wouldn't surprise me if the male propensity to ego-involvement, seeking pride, feeling less stress despite high risks, testosterone-driven competition, and greater risk taking	4	4	4
1697	1	the cross # There is no other object of knowledge in the universe that exposes proud, man-exalting thinking like the cross does. Only humble, Christ-exalting thinking can survive	4	4	4
1698	1	Mrs. Yang and her uncle, but I think the sin of Robert Krulwich is pride, not racism. He privileged his facts above hers not because she was a	4	4	4
1699	1	the wall from the front door sometimes, ugh. I wonder if it is pride? Or something. I feel like throwing some salt around her house. lol	4	4	4
1700	1	who had family ties with Castle Druid. # Clow was a wonderful character. Proud, skillful, passionate about what he did, and a true individual. His	4	4	4
1701	1	call Jenny a fucking bitch. Cause she can make that into a title of pride and turn your little unknown PR firm into a vortex of bad PR. #	4	4	4
1702	1	like sure things. Yeah, right. It will be the truly wise, proud Scorp who realizes that all that glitters is not gold. In fact, it	4	4	4
1703	1	going to jail. # I had to stop being so stubborn and swallow my pride and deal with it. Like I said, it was a blessing in disguise	4	4	4
1704	1	with the study seems obvious: those who took the survey were attendees at gay pride parades -- hardly a representative sample of LGBT people. Other issues include age samples	4	4	4
1705	1	as they watch you from such a close proximity. There is a sense of pride and a gentle spirit that you can feel from the Tanzanian people that is unlike	4	4	4
1706	1	different. And as I write this, I find myself wondering, why is pride one of the seven deadly sins but not shame? Because of the two,	4	4	4
1707	1	religion, we could be blind to God and neighbors because of self-righteousness, spiritual pride and rigidity of mind. Ecclesiastical customs and persons, when naively and narrowly deified	4	4	4
1708	1	in life. # Pride makes the person continue in the Faith but in a proud manner. This is very dangerous, because he thinks he is doing the right	4	4	4
1709	1	kinds of ways of manifesting good qualities in the face of suffering, foolishness, pride, impurity, the disgusting things of the world, the impurity of food,	4	4	4
1710	1	their next three games to do so, but there's another motivating factor: pride. # The Hokies have plenty of other motivation, like playing a top-10 team	4	4	4
1711	1	Chemistry, a full semester early and with honors, that's something to be proud of. Earning my law degree while working full time, that is something to	4	4	4
1712	1	harder to obtain. Although the seven virtues counter each of the deadly sins, pride is the sin which is able to affect them all in a way that the	4	4	4
1713	1	is choice -- the choice to serve God or to serve sin, vanity and pride. Angels are the original exercisers of religious liberty and freedom of conscious. The	4	4	4
1714	1	chance that you're sincerely confused, and not just doubling down out of wounded pride, this should help: # And " gnostic " is used as an adjective	4	4	4
1715	1	of the persons at Rome's disposal. " # Again we see the intellectual pride of the left rearing its ugly head. If Rome's thinkers were so amazingly	4	4	4
1716	1	strides toward secular equality. # I informed my LDS mother that Mormons marched in Pride parades this year, and to my chagrin, she replied, " Sure,	4	4	4
1717	1	has told us, as important as the first commandment. # If you add pride to this, you get flattery. This means that you compliment a person inordinately	4	4	4
1718	1	men have it so easy, being men. # However I do say the pride parade is rather obscene. Parading around half naked while committing borderline public indecency is	4	4	4
1719	1	is a humble love. It is not a proud love. Those who feel proud of their position can not experience love for God. The two emotions are incompatible	4	4	4
1720	1	, greed and selfishness.. # exactly which is the very essence of pride......... pride says " im better than you " and pride says " i do nt care	4	4	4
1721	1	his creator, and its cause was pride, the sin of sins. Satanic pride, any pride, is, theologically speaking, a perverse will, literally a	4	4	4
1722	1	among the elite is an elixir of enormous pride.... but God has shown that pride can be a failure. Not just America, but the rest of our world	4	4	4
1723	1	that you have it in reverse -- engaging in this fight is only about short-term pride. My thought is that in the long term, if this dispute is ditched	4	4	4
1724	1	is called a traitor because they endorsed a non-black for a job. # " Pride is one thing, attacking someone in this manner is something else. And so	4	4	4
1725	1	Elevatorgate bullshit started. # I suspect maybe Thunder suffered from some all too human pride. If Thunder is now prepared to draw a line, I think it's	4	4	4
1726	1	" can be interpreted as a masculine lover, in accordance with the " gay pride " aspect of the song. In that case, who or what is "	4	4	4
1727	1	the creation of....... " To Elvis -- The Memphis Phoenix "........ finished with pride! Need I say	4	4	4
1728	1	Middle East/African Muslim countries, especially those that uphold the sharia law. Yes gay prides do occur, but in very few of these countries. A simple google search	4	4	4
1729	1	war must have its way. But I have no serious doubt that the ordinary prides and shames of social man, once developed to a certain intensity, are capable	4	4	4
1731	1	about it now, " says Earl Fowlkes, president of the Federation of Black Prides and also a long-time board member for D.C. Black Pride. " To have a	4	4	4
1732	1	. Stand up n be counted. Stand up for peace n freedom. Stop priding urselves in violence n in d fact that AMISOM can't stay forever. They	4	4	4
1734	1	t-shirts are overrated and take precious $$$ from teh kittehs. Say it louder and prouder with your regular apparel covered in cat hair and reeking like ammonia. Works for	4	4	4
1739	1	at Santa Teresa High School (a public school, despite the name). Proudest athletic achievement: a 5:20 mile my junior year. Football was always my first	4	4	4
1741	1	at first glance, but is actually not correct. " # And about those proudest moments? Harada has it pinned down, " The achievement in Tekken sales in	4	4	4
1743	1	has barely been vetted by the media. He's been the GOP' s proudest anti-war, anti-torture voice for four years. That position has earned him soft interviews	4	4	4
1744	1	. # DIG: Since you founded Jolie &; Elizabeth, what has been your proudest moment? # SED: We recently opened our own showroom/wholesale office at Upperline and	4	4	4
1748	1	rusted out holes in the passenger-side door? Do we really believe that Obama's proudest possession was a coffee table extricated from a dumpster dive? Sorry, folks,	4	4	4
1750	1	know how they expected to win in Oregon... # Plenty of President Obama's proudest supporters are pale but aging more or less gracefully. # Increasingly the talking points	4	4	4

## Sheet: COCA-News
seq	evaluator(1: first pair; 2: second pair)	content	A	B	final
1	2	assure the quality and uniformity of the Florida round tomato. Thus, Procacci's pride couldn't be sold outside Florida in the prime winter growing season, from October	0	1	0		0: Non-pride
2	2	As the flagship radio home of the world champion BOSTON RED SOX, WEEI is proud to extend our relationship with JOE CASTIGLIONE and to welcome this elite group of broadcasters	0	1	1		1: Individual pride
3	2	financial literacy training to help them manage their windfall. # " We were very proud at Timbuk2 to have worked with the CEO to carve out those proceeds for the	0	1	1		2: Relational pride
4	2	history. This spring, he is a 30-year-old junior left-handed pitcher. Playing for Pride, if you will. # " Curtis Pride is a hero in the deaf	1	0	1		3: National pride
5	2	's best passing teams has grown even stronger. # " I take very big pride in that because we're the ones that allow the hitters and the setters to	1	2	2		4: General pride
6	2	she went to the Olympics she thought she would become a beacon of hope and pride for a community terrorized by a gunman on July 20. I can't help	1	2	1
7	2	in high respect and regard, and they're the community treasure and also the pride of the community, as are their big breeding rams. The yak is very	1	2	1
8	2	than on behalf of himself. " # Adams, she says, " was proud of the commercial work he did. He treated his clients with great respect --	1	2	1
9	2	Sports Network, called the change " inspired. " # " We're very proud of our association with all three (Triple Crown) locations, " he said	1	2	2
10	2	the concept of Christmas, we already were firmly entrenched in Kwanzaa and I'm proud to say she has never sat on Santa's lap. Over the years my	1	2	1
11	2	faucet. Remember, we like surprises at someone else's expense. I'm proud of her. She went through UGA, got a master's and then a	1	2	2
12	2	conversations helping shape the leader he has become. Greene talked about Hawpe like a proud father. # " He gets it, " Greene said. " He does	1	2	1
13	2	decision, and we can rest assured that Maj. Stock Coleman will make us all proud with his leadership of the State Patrol. # A valiant effort # I read	1	2	2
14	2	stories are once again reminding the world of the cutting-edge company that Houston was once proud to claim. But few people seem inspired to part with even a few dollars	1	2	1
15	2	bring a gleam to the eye of Billy Ellis, a banker and big-game hunter proud of his credentials as a son of the Confederacy. Pictures of his great-grandfather who	1	2	2
16	2	of the company, to get to know people within the organization and make them proud to be at eBags, " Cobb said. # He has since remarried --	1	2	1
17	2	of all they deserve our support and praise. # So if you are a proud parent, as I am, go home and hug your children and take time	1	2	1
18	2	companies to put ratings that -- warning labels for parents. And I'm so proud of what she accomplished in getting them on there. # I've been involved	1	2	1
19	2	, " Bob, you are the best crew chief out here. I'm proud of you guys. Keep your heads up. " # He and Osborne might	1	2	2
20	2	him for allowing us cyclists to have that unique opportunity. He beamed like a proud papa with the imminent opening of the tollway. A similar party for bicyclists only	1	2	1
21	2	" To represent CSU Fullerton today and female veterans throughout the state makes me especially proud. " # Ward has served CSUF's veteran students since 2009, with a	1	2	2
22	2	do come back. They come back being well-mannered, intelligent people you can be proud of. But if you screw it up early on, you're never going	1	2	1
23	2	Kaitlin is a public safety reporter with a focus on investigations. She is a proud Ohioan, champion for local libraries, volunteer reading tutor and an expert ice cream	1	2	1
24	2	proud of Bruce when he reached his goal in 1976, but I'm more proud of him now. It takes a lot of courage to do what he's	1	2	2
25	2	had sound effects. Some had blinking lights. All were carried in by blushingly proud parents. The minority of us who had stuck to the assignment were shocked.	1	2	1
26	2	Picciolo in front of the dugout. A menacing hitter a minute earlier, the proud father softened, smiled and glowed at the sight. Pujols had that look of	1	2	1
27	2	" # Even then, Prima knew he had a legacy to protect. His proud ethnicity helped to pave the way for other Italian-American singers. Prima also was the	1	2	1
28	2	just like us! - but there is less sympathy now that Chinese are taking pride in their own traditions for thinking about social and political reform. But more understanding	1	3	3
29	2	, before he was a citizen. My mother is descendant of many generations of proud Americans. My heritage is both Native American, and ancient Immigrant. # I	1	3	1
30	2	to read and write haiku. //' I know that writing haiku is not a proud thing for a Korean to do,' said Takeshi Ushijima, a Japanese chemical	1	3	1
31	2	also a fine conversation piece. And it really does make me feel like a proud New Englander and maybe a little bit edgily grandmotherly in my relish choices. But	1	3	3
32	2	long before it was popular or safe to express that support. We are equally proud of our ongoing relationships with America's and Atlanta's civil rights leaders and organizations	1	3	3
33	2	And seeing the look on Dhani Harrison's face -- a combination of gratitude, pride and love -- is priceless. # Yet the brilliance is in the selection of	1	4	4
34	2	a resignation statement this morning that he " shall wear the creditors' loathing with pride. " While his departure added to a week of high-stakes drama that puts Greece	1	4	4
35	2	The New Zealander spoke of confused emotions: " awe, wonder, humility, pride, exaltation. " // Gen. Chuck Yeager uses words like " duty " and	1	4	4
36	2	and they're really struggling. " # A Sinclair mantra is " design with pride, not pity. " Beauty and aesthetics are important, he says, no	1	4	4
37	2	just shy of spiteful, you know what I mean?... It was just pride getting in the way, and all the knowledge he gained over the years,	1	4	4
38	2	the war successful? Partially. # It was all years ago, and the pride of having faced an enemy, of being in the forefront, is now less	1	3	4
39	2	this article, saying it was irrelevant to her work as a doctor. # PROUD, WITH' NOTHING TO HIDE' # " I have nothing to hide.	1	4	1
40	2	of additional suggestions from readers. # Time Magazine music critic Josh Tyrangiel -- a proud alumnus of the Memorial Stadium grounds crew during the Orioles' forgettable 1990 season --	1	2	1
41	2	the country massive reparations. This is what is owed a dignified nation with a proud history, he says, not the same imperial rhetoric of " helping " and	1	3	3
42	2	aback when I received a late notice on my December water/sewer bill. Like any proud resident of Portland, I immediately paid it online but not before I got a	1	2	1
43	2	a profanity-laced news conference and resigned a day later. # " I'm not proud of the way it ended, " Mora said of his tenure in New Orleans	1	2	2
44	2	US Marines - he even aspired to be among the " the few and the proud. " During the initial US humanitarian intervention to contain famine in December 1992,	1	4	4
45	2	is to educate the public and let them make an informed decision. I'm proud of the effort that was done to educate Missourians. I don't view it	1	2	2
46	2	asked East Coast students how they felt during hookups, men used words like " proud " and " accomplished. " Women felt " aroused " and " oblivious.	1	4	4
47	2	She said she has gay and lesbian friends in South Africa who do not have pride celebrations like Chicago's, so she was happy to support them. # "	2	0	0
48	2	Tommy Tune received a Lifetime Achievement Award, acknowledge his Texas roots and expressed his pride at the inclusiveness of the Broadway community. Carnegie Mellon presented the first Excellence in	2	0	2
49	2	, her cooks rely on deep-fryers to keep up with the demand for Prince's pride. # The secret to just-good-chicken, then? Although preferences differ, Prince likes	2	0	0
50	2	varsity versus the freshman team. The game didn't count for anything other than pride, and we had to freeze the ball to beat them. That's how	2	0	0
51	2	in accepting these prizes for Ledger with " an awful mixture of sadness but incredible pride. " # runs during the Mostly British Film Series presented by the San Francisco	2	0	0
52	2	election, but that what happens in the spring isn't clear. // Gay pride group says it will raise money to pay for S. Carolina tourism ads after state	2	0	0
53	2	" strong language " in the national Democratic platform against LGBT discrimination. // " Pride in the Party " // The 358 delegates represent the largest number of out LGBT	2	0	0
54	2	of gender-bending look-alike contests. She embraced them as well. She began attending gay pride events, and in 1996, she became the co-host of a syndicated television talk	2	0	0
55	2	's article on Chicago's Gay Pride Parade " Rainbow parade full of color, pride, " news story, July 1 said, " ABC-Channel 7 anchor Ron Magers	2	0	0
56	2	At Kentucky, he ironically inherited a program embroiled in scandal, and quickly restored pride to the team he later called " the Roman Empire of college basketball. "	2	1	2
57	2	being selected in the first round of next year's draft. Dantonio takes obvious pride in Calhoun, the latest in a line of what he and his coaches considered	2	1	2
58	2	standing her ground and turning back looters of a pizza building, it gave me pride I thought I had lost. The majority of people in Ferguson stayed at home	2	1	1
59	2	him, he feels only emboldened. When they beat him, he beams with pride. The narrator knows, " We were at heart village boys, ignorant and	2	1	1
60	2	growing during a time when the city's tree canopy - a point of civic pride - has been shrinking because of the drought. Personett said the city is now	2	1	2
61	2	. " Over the years, first Bill and then I have really taken great pride in creating a strong legacy for southern Missouri (and) making sure that southern	2	1	1
62	2	team to victory. His girl, Jessie (Charlie Murphy), beams with pride and sensual excitement, swatting away the affectionate gestures of Susie Monican (a cool	2	1	2
63	2	wrong. # " There's no doubt there's a hit to the civic pride, as well as the very real loss of those jobs in the community,	2	1	1
64	2	best supporting actress in a comedy. " I hope the cheerleading coaches take some pride in this, " she said backstage, " but for me I know it	1	1	1
65	2	everyone from those days, cast and audiences alike, should feel a sense of pride and ownership in the first new work to put the Denver Center on the national	2	1	1
66	2	:' Bob, in a certain way, I think the same joy and pride you get by being co-owner of the Giants is what I have in my partnership	2	1	1
67	2	unable to understand why the Denver Art Museum does not share the sense of civic pride and responsibility displayed by our elected officials. Each time I walk along the north	2	1	1
68	2	way around town. They make up 20 percent of the population, and their pride and prosperity are apparent. Their costumes are so distinctive: embroidered white blouses,	2	1	1
69	2	town with an historic district for a distinctive character and a strong sense of civic pride, " he said. # North Grove Crossings is just a few minutes north	2	1	1
70	2	went with the courage that only the Holy Spirit can give and he went with pride and love for his career and vocation in the Army, " said the Rev.	2	1	1
71	2	ripped flesh, dehydration, exhaustion or broken bones. # Owners express a deep pride in their dogs' abilities, comparing the animals to professional athletes. In a	2	1	2
72	2	" # Crab culture in Baltimore creeps into every nook and cranny of fine Southern pride and Southern establishment so that " your family's crab cake recipe is passed down	2	1	1
73	2	co-chairmen Bob Shaye and Michael Lynne say. # " The films have increased our pride factor, " Shaye says. " It has validated us in the creative community	2	1	1
74	2	ASO spelled out the need for " an Atlanta landmark for cultural tourism and civic pride. " On that score, the Kimmel is a knockout -- and Atlanta should	2	1	1
75	2	a little hotel until we found a house. Everyday my father went off quite proud in his new bowler hat, which would have looked silly, I think,	2	1	1
76	2	remember from the old days. " # " I think the village will be proud of the building we'll have there and I'm confident we'll back it	2	1	2
77	2	it's been 50 years, " he said. " I will always be proud of that moment. " # On the morning of July 16, 1969,	2	1	1
78	2	Space Administration ship built for humans has gone in more than 40 years. Colorado proud It will be a huge moment of pride for many in Colorado. Orion was	2	1	1
79	2	but I feel like I'm raising sensible, conscientious girls. And I'm proud of that. Still, sometimes they lay it on a little thick. The	2	1	1
80	2	inspired to come see what the Hudson Valley is all about, we're very proud of showing off (Irving's) house and telling his story. But we	2	1	2
81	2	a really nice house for $ 62,000. The friendly folks who live here seem proud of the attention focused on their town because of the presence of the Unclaimed Baggage	2	1	4
82	2	best in the state. Bands, choirs and drama students have much to be proud of as well. # While parents can be justifiably happy with those successes,	2	1	1
83	2	question, Cooke drove away from the Manzanar camp in Southern California " none too proud of the showing we had made in running the first compulsory migration of American citizens	2	1	1
84	2	, but they're doing the work of the 1 percent. Wall Street is proud of them every time they clear out an encampment. " # #	2	1	2
85	2	himself also commented on the deal in the Gazprom statement. # " I am proud that we were able to create an independent media group which was able to take	2	1	1
86	2	the street from NU's Ryan Field football stadium. " NU is still a proud university, and a few bad apples can't tarnish things. " # Sandra	2	1	1
87	2	and its attorney clearly would enjoy for obvious reasons. # Gwinnett citizens should be proud thus far of how this difficult case has been carefully and fairly handled by all	2	1	2
88	2	mine design that took into consideration local concerns about water. " We're really proud of the environmental design, " says Shrake, citing a rainwater catchment system and	2	1	2
89	2	at the MGM Grand hotel-casino for one more year. # " I'm very proud of the show and what we've down with it so far and I look	2	1	1
90	2	Signs in bar windows read, " Cleveland against the world. " Chicago has pride and attitude, which you can see by comparing our mayor, Rahm Emanuel,	2	3	3
91	2	at total peace. I'm still a proud American - Texas loud, Texas proud. God bless America. God bless everyone. Let's do this damn thing	2	3	3
92	2	Every April 23 the streets of Barcelona fill with red roses and Shakespeare as the proud Catalans celebrate the feast of their patron, Sant Jordi. Why does the Mediterranean	2	3	4
93	2	the list of priorities for the prosecutors in this case? # I am a proud native Texan, but I am ashamed of what my state is doing in my	2	3	3
94	2	years in this country and forget where their forebears were born. I am very proud of my culture. # Shellabarger calls it " " unreasonable " for us to	2	3	3
95	2	's a tremendous fear of independent and talented black men who are racially secure and proud of their heritage, " says Marcus Alexis, former chairman of the Federal Reserve	2	3	3
96	2	give you a fact you might be amazed by, but we should be really proud, our state has the highest net-bound inward migration of people with bachelor's degrees	2	3	3
97	2	of the Texas congressional delegation watched the vote from the gallery. " I'm proud of Julian and excited for our country, " Rep. Castro said after the vote	2	3	3
98	2	only in a general way, just as people in France can continue to be proud of the French Revolution without wanting to set up a guillotine in a downtown square	2	3	3
99	2	. Most, though, have dreams of turning their lives around after experiencing the pride of teamwork. One kid, with dark eyes and a head of bushy hair	2	1	2
100	2	. " I look at the Hawks, they're style of play, the pride they take on the defensive end, the pride they take in sharing the basketball	2	1	1
101	2	violent death in southern Beirut has been greeted in Wadi Khaled with a mix of pride, disgust, and denial. While Anwar and several other residents from the area	2	4	4
102	2	thrown out of car windows or has fallen off garbage trucks. Where is the pride in Texans? Why don't the state and cities keep it clean? Image	2	1	2
103	2	different stuff that has happened over the last several months -- kind of a wounded pride, so to speak, for K-State fans -- we look at that home opener	2	4	4
104	2	" no " vote on the referendum hang in storefronts. Rainbow lights advertise " Pride " directly under neon Miller Lite signs in gay-bar windows. A much-anticipated gay-marriage benefit	2	4	4
105	2	about this game for years. # 3 FOOTBALLS: More at stake than team pride. # 2 FOOTBALLS: Worth attending. # 1 FOOTBALLS: Only attend if	2	1	4
106	2	the sons reflected on his actions with a mixture of bewilderment, chagrin, and pride. # Events have moved quickly for the family since the discovery of the Rockwell	2	4	4
107	2	, as they would look forward to the rematch. There is a lot of pride in both programs. But to do that, we must win. I feel	2	1	2
108	2	good. # Interestingly, given the overall success of Finnish education and Finns' pride in it, state spending on schools is actually declining. Karkkainen has had to	3	2	3
109	2	" 3390 # The exit for Kibbutz Givat Brenner, the largest of Israel's proud old collective farms, is marked by a bright sign for " House of Dreams	3	0	0
110	2	the required steps and procedures to become legal residents and ultimately were sworn in as proud U.S. citizens. # The current immigration issue, primarily from Mexico and Central America	3	1	3
111	2	do. # Working together, we have made tremendous progress, and I am proud to report that the state of our state is strong -- stronger today than it	3	2	3
112	2	and this fact triggers envy. Asians, as Jews before them, should be proud of their success. # RUDY J. BUDESKY # El Cerrito # . # ANIMAL	3	1	3
113	2	became great friends. Best of all, he told me, his friends are proud of him and what the picture says about their Sioux heritage. # " A	3	2	2
114	2	, someone like me, or just any patriot, has every reason to be proud of his motherland. " # Given that belief, it is not surprising that	3	2	3
115	2	a February 2013 reply to Murphy, who in oversized letters noted that the Gay Pride festival and parade would be split over two weekends. It also was sent to	4	0	0
116	2	, Laurie Grauer, told the local LGBT newspaper that she's marched in gay pride parades in the past without problem. She also said that she actually supports the	4	0	0
117	2	4188290 First tears, then celebration at 47th annual Chicago Pride Parade # Chicago's 47th annual Pride Parade was filled with emotion as people honored	4	0	0
118	2	Hicks pets Coco, a dog up for adoption Hensley brought to Saturday's Charlotte Pride Festival. The official opening of the Charlotte Pride Festival and Parade weekend drew large	4	0	0
119	2	in Orlando, Fla., Lisa puts her own safety aside to ride in the Pride Parade; jealousy sparks the nastiest fight of Tom and Ariana's relationship; Stassi	4	0	0
120	2	knows. Other Hofstra tidbits: # The sports teams have been called " The Pride " for the past decade or so, but before that had been known as	4	0	0
121	2	, 51, of Concord, said as he walked North Tryon Street at Charlotte Pride, the city's annual gay pride event. # The festival and its parade	4	0	0
122	2	fight back is to show up for Pride activities throughout the month and the Chicago Pride Parade on June 26. Only light can conquer darkness. Only love can trump	4	0	0
123	2	. Diedra **33;2378;TOOLONG # Crowds filled Tryon Street from the very beginning of the Charlotte Pride Festival Saturday. The official opening of the Charlotte Pride Festival and Parade weekend began	4	0	0
124	2	Wallace performs at Saturday's Charlotte Pride Festival. The official opening of the Charlotte Pride Festival and Parade weekend drew large crowds and included presentation of the colors, national	4	0	0
125	2	participate in a moment of silence for the Pulse Orlando victims at Saturday's Charlotte Pride Festival. The official opening of the Charlotte Pride Festival and Parade weekend drew large	4	0	0
126	2	attends a vigil in Erie, Pa. # The setting sun illuminates a gay pride flag held by Dina Doerfer of Millcreek Township as she attends a vigil in Erie	4	0	0
127	2	. Delta has begun touting its 2016 Pride event, slated for June. Several Pride sponsors, including some leading local employers, said they plan to return. "	4	0	0
128	2	infrastructure for community outreach or criticism from within, " he said. Unlike some Pride organizers elsewhere, Delta's website doesn't post bylaws or financial information or identify	4	0	0
129	2	and Baltimore spend less than $150,000 per year on Pride. Yet in 2013, Pride accounted for a little over one-quarter of Delta's $929,689 budget. Another $544,542 was	4	0	0
130	2	that he had always been to them. One teammate accompanied Sam to a gay pride parade; others joined him at a gay bar. This is the future of	4	0	0
131	2	. So far the law has been used mainly against adults attempting to stage gay pride parades or other demonstrations in support of LGBT rights. But according to a report	4	0	0
132	2	9846 When revelers pack the streets of Boys Town in West Hollywood for LA Pride this weekend, the annual celebration will have rearranged the **32;3116;TOOLONG acronym to TLGB to	4	0	0
133	2	festival has awarded more than $7,000 to a variety of represented nonprofit organizations. Austin Pride Festival Sept. 22 Fiesta Gardens www.austinpride.org What starts with a 5K run, ends with	4	0	0
134	2	, Gay Men's Chorus of Houston, Bayou City Women's Chorus, Houston Pride Band and Unhinged Productions join forces for a whopper of a show. 8 p.m.	4	0	0
135	2	St. Emanuel; tickets $15-$17; 713-225-5483 or www.warehouselive.com. Tmar Davis performance 26 The Pride SuperSTAR competition is down to nine singers this week, and they'll get within	4	0	0
136	2	is expected to spike today as tourists arrive in advance of this weekend's gay pride events. As of Thursday afternoon, 206 same-sex couples had appointments to get marriage	4	0	0
137	2	H. Graham Motion) # Black Magic Mama (Doug F. O'Neill) # April Pride (GB) (James M. Cassidy) # Internallyflawless (Bob Baffert) #	4	0	0
138	2	, Guava Lamp, 570 Waugh. Information: houstonprideidol.com, guavalamphouston.com or 713-524-3359. // Pride Houston Kick-Off Party: Cocktail party with community speakers. No cover. 7 p.m	4	0	0
139	2	Grove streets, San Francisco. Free. 415 981-1960. www.ourfamily.org // Sunday // -- Pride Communion Service: An interdenominational Holy Communion/Eucharist along the parade route prior to the parade	4	0	0
140	2	770-904-5413 or **29;13038;TOOLONG // It's the Big Apple for Mill Creek band // The Pride of Mill Creek Marching Band has been selected to perform in the 2008 St. Patrick	4	0	0
141	2	never should. // Heidi Harrison // Berkeley // Editor - I attended my first Pride Parade in 1973, so imagine how many memorable moments I can recall through the	4	0	0
142	2	still here, stronger than ever. If it weren't for San Francisco Gay Pride, we might have never met. That day changed my life for the better	4	0	0
143	2	, yet there was always room for another on this colorful, joyful day of Pride. Once on Market Street, we followed a continuous carpet of sights and sounds	4	0	4
144	2	Seals, one Jaguars, one Ambassadors, one Vikings, one Victory, one Pride, one Power, one Quest, one Breakers, one Surf, one Storm	4	0	4
145	2	always heavily perfumed with allspice and thyme, the classic jerk spices. At Jamaican Pride, one popular patty is filled with ackee, a soft, slippery-sweet fruit that	4	0	0
146	2	for the coming decades. # . June 19, 7 p.m.: Houston GLBT Pride Interfaith Worship Service, Resurrection Metropolitan Community Church, 2025 W. 11th, sponsored by	4	0	0
147	2	caps of the prime rib, " said Desmond Patterson, an owner of Jamaican Pride Bakery in Prospect-Lefferts Gardens, Brooklyn. There, Mr. Patterson and his crew turn	4	0	0
148	2	a clownish way, Cojocaru is a revolutionary, making good on the circa-1988 gay pride chant of queer, here, and used to it. # Smart, covert	4	0	0
149	2	: When she wears this bra, she says, " It will be with pride. It gets me emotional just thinking about this. I have been through fire	4	1	4
150	2	top of the list, " Ward said. " I take a lot of pride in that. As much pride in coming down and hitting people. Whoever stamped	4	1	4
151	2	ones of jubilation and celebration, all mixed with an overwhelming sense of accomplishment and pride. For Brandon Tuziken of Ross, it will forever be home to a life-changing	4	1	4
152	2	is the one who told me about the team and their recent victory. The pride hasn't worn off for her. It was her first race and she emerged	4	1	4
153	2	sports, from water polo to volleyball to basketball, is a point of much pride. // And to have the basketball players standing at attention as the U.S. flag	4	1	4
154	2	her have been cast aside. Some have lost their jobs; others, their pride. # The manner in which that happened speaks volumes about how difficult and wrenching	4	1	4
155	2	beautification of the area, the group's goal was to create a sense of pride and personal ownership for public and private spaces and reduce crime in the area.	4	1	4
156	2	conference was held Saturday -- he is a mere shill rather than a point of pride, a leering caricature used to purvey everything from burgers to used cars. Few	4	1	4
157	2	n't, they won't. # Naismith and Wooden, they would all be proud, " Kidd said of Frank's start. We're happy, but at	4	1	4
158	2	them by lifting them up with options and ideas for change. We're proud members of # Press releases Email press releases to **29;861;TOOLONG. Hard copies of information	4	2	2
159	2	She slipped up Monday, however, when she told Fox News that she was proud to share a birthplace with actor John Wayne. It was actually John Wayne Gacy	4	2	4
160	2	, 7-3 with a 2.54 ERA. " We're giving them something to be proud of. I'm not saying we have it all figured out, but we	4	2	4
161	2	brought life to many people, " Gathe said. # That would make Watkins proud, said his mother, Cutie Sandles of Dallas. # She got to know	4	2	4
162	2	a horse sanctuary in South Dakota. " With this support from Ford and Take Pride in America, the BLM will be able to carry out the will of Congress	4	3	3
163	2	myself as just another American. " # Groundbreakers walk a hard path, and Pride chafes at the notion that he was the Jackie Robinson of country music - and	0	0	0
164	2	of those efforts certainly deserve an audience. Ladies and gentlemen, the management is proud to present Virtual Vaudeville. # Given the technology behind the headlining exhibits at Virtual	0	0	0
165	2	. # Rome -- Bologna (Italy), 28 January 2019 -- Bio-on is proud to present alongside Unilever a brand-new line of sun protection products made from its revolutionary	0	0	0
166	2	. # The march organizers -- after making clear they're separate from Chicago's Pride Parade -- took to Twitter to defend their decision to boot the Jews, by	0	0	0
167	2	raises awareness for HIV/AIDS. She even walked for the organization at last Sunday's Pride parade. # " It affects so many people, and we have to find	0	0	0
168	2	league stats were modest, he had his moments. # With the Expos, Pride hit the second big-league pitch he saw for a two-run double and got a five-minute	0	0	0
169	2	78-72-150 # N. Thompson 76-74-150 # Skip Kendall 79-71-150 # Phil Tataurangi 72-78-150 # Dicky Pride 74-76-150 # Troy Merritt 74-76-150 # Andrew McLardy 75-75-150 # Brian Bateman 76-75-151 # Grant	0	0	0
170	2	# 47 Powell Industries 51.00 662.1 69 156.9 16 12.5 84 -34.2 35 # 48 Pride International 51.50 2,310.4 40 58.1 33 18.4 67 -52.9 66 # 49 Apache Corp.	0	0	0
171	2	landlords Vibrancy. Seek out rental units in locales with thriving businesses. # *Block pride. Zero in on properties where tenants prize upkeep. # *Have vision. When	0	0	0
172	2	Spirit Competition at George R. Brown Convention Center, Glory White received first place and Pride fourth. # The program's students and team members represent every community in the	0	0	0
173	2	Heritage Foundation; Jane's Armour and Artillery, Desert Shield Fact Book CUTLINE: PROUD: Capt. Ayedh of the Royal Saudi Air Force - his last name is	0	0	0
174	2	. Carolina dethroned San Francisco atop the division last season, and rest assured the proud 49ers want to prove they are still formidable, even on the road and without	0	0	0
175	2	. A new strategy to deal with North Korea would seek to exploit Pyongyang's pride, or rather, its need to be proud. It wants recognition, and	1	1	1
176	2	in the Universe. But a more pressing regional concern has arisen: Is the pride of Prince George's County, the guy who was named Washington Post All-Met Player	1	1	1
177	2	ring with Sugar Ray Leonard in a 1978 bout earned him the nickname " The Pride of Lowell. " # After Eklund retired - driven from the ring by an addiction	1	1	1
178	2	leg up in the Southeastern Conference Eastern Division and maybe Tennessee coach Lane Kiffin's pride. The top-ranked Gators have been gearing up for this game since Kiffin's first	1	1	1
179	2	BoatU.S. study. Color Photo: Dale Bowman/For the Sun-Times; Trophy racks are the pride of Muy Grande Ranch (Booth 703) at the Chicagoland Outdoors Show, which	1	1	1
180	2	back. # " I did my own rehabilitation, " he says, a proud grin spreading across his face. # At 38, Kelly Bess is a striking	1	1	1
181	2	call to them cost more than the robocall, so there. The representative was proud of his retort to my complaint. # It's a good thing Joe the	1	1	1
182	2	GPA by keeping them on campus and motivated to succeed. And it builds school pride and loyalty, both of which increase a student's odds of graduation. "	1	1	1
183	2	be almost as much of a hardship for Duchene as his injured knee. The pride of Haliburton, Ontario, he talks almost as fast as he skates and,	1	1	1
184	2	good memories, but these scenes are usually tainted by some dark detail. The pride of college graduation is spoiled when a friend makes a cutting remark. The wedding	1	1	1
185	2	Alice Walker's " Am I Blue? " My husband and I are the proud owners of two horses (" Stormy " and " Spirit "). I	1	1	1
186	2	they've since raised two sons, ages 10 and 17. // They're not proud of their failed marriages or the pain they caused their spouses, even though both	1	1	1
187	2	was never an option. # " This is something you ought to be very proud of as a city, " Landmark Commission chair Katherine Seale said shortly before the	1	1	1
188	2	private institution was seen as a trade school for men. # " He was proud when Dunwoody became coed, " said Ben Wright, whom Phillips hired as a	1	1	1
189	2	the music store, even the mom and pop corner stores. I was so proud. But the one thing I regret, that I wasn't able to shoplift	1	1	1
190	2	have Charlottesville. The ugliness of racism and hatred was displayed without shame. With pride, in fact. No white hoods seen in that crowd, but there were	1	1	1
191	2	this is important for the future of the Malian people, their dignity and their pride. " In modern times Timbuktu has become a synonym for a remote place.	1	1	1
192	2	moving in the right direction and try not to get trampled. We're very proud to be serving the citizens of the United States. " # Homeland Security chief	1	1	1
193	2	Chocolat. # " Traveling and living around the world, I wasn't always super proud of being from the South or being a Southern woman, " Hard said.	1	1	1
194	2	" It needs to be something the community and the county and the city are proud of, and that's the kind of stuff that we are looking at,	1	1	1
195	2	South Side neighborhood of Hegewisch. # " It's something for Illinoisans to be proud of, " Wiesenfelder said. Cars.com is also headquartered in Chicago. " Illinois	1	1	1
196	2	We put San Antonio on the map. We're the foundation. We're proud of that. " # The Spurs seemed headed for the Finals in 1979 after	1	1	1
197	2	to open doors for gay travelers, especially in Latin America. # He was proud of his Puerto Rican heritage. And as the national brand manager for a travel	1	1	1
198	2	football heaven, former Arizona head coach Larry Smith looked on with a grandpa's pride Friday night as Preston Smith helped Gilbert Mesquite beat Marana Mountain View in the first	1	1	1
199	2	tried to create a greater sense of alma mater, a greater sense of campus pride, " said Bourgeois, noting that all of this goes back to the idea	1	1	1
200	2	of U.S. Central Command said in an email. Fellow soldiers from Georgia swell with pride when they talk about how two of their own are in charge of fighting the	1	1	1
201	2	cringe-worthy nickname: " The Mistake on the Lake. " The frustration -- and pride -- felt by Clevelanders is, perhaps, best spoken in social media. "	1	1	1
202	2	of a helicopter, " he said last year. Some analysts here say the pride that leads Mr. Erdogan to seek more power after a decade in leadership is likely	1	1	1
203	2	's more to the story. Pine Ridge is also a place of hope and pride, says Dana Lone Hill, an author born and raised on the reservation.	1	1	1
204	2	plainly marked on the bottom that they were made in Taiwan. Where is the pride in American-made products? # Virginia L. Wielgot, Aurora # Candidates associations # Democratic	1	1	1
205	2	But I don't know if it was about love. It was probably about pride. " # He did appreciate a good movie love triangle. " It was	1	1	1
206	2	very little about how orchestras work. # " It's a matter of personal pride,' he said. " If I'm going to do something, I	1	1	1
207	2	familylike culture anymore, " said current principal Anthony Matthews. " We still want pride and commitment, but we want it focused on education. " // The city	1	1	1
208	2	of French business, finds itself shamed in the very arena where it had taken pride in being one step ahead of its Anglo-Saxon rivals that dominate financial niches like investment	1	1	1
209	2	and am frequently mimicked. Because I can't regard accent as a cause for pride, I don't mind some occasional ribbing from friends - but I do wish	1	1	1
210	2	breathe airplanes. # But too often in business, as in life itself, pride cometh before a fall, and it's fair to say that's what happened	1	1	1
211	2	families may need prodding to get the conversation going. Some parents, out of pride -- or even suspicion of their children's motives -- may avoid the topic altogether	1	1	1
212	2	. # Bockas wears all of it with a mix of casual bravado and adolescent pride. # " It's an integrity thing. You want to stand up for	1	1	1
213	2	broken into groups and learn to use their teachings to tackle their own issues of pride, forgiveness, hatred and bitterness. The longer they stay, the more challenging	1	1	1
214	2	That Franklin takes justifiable pride is evident throughout Mirror to America, but it is pride tinged with bitterness. Franklin is African American and has experienced too much bigotry and	1	1	1
215	2	heart broken many times, " he said, with what sounded like equal parts pride and rue. " I found out it isn't lethal. It hurts like	1	1	1
216	2	for 25 years -- have been using music to gain acceptance and visibility, express pride and offer hope to the hopeless. In just three years, the transgender choir	1	1	1
217	2	professional sports. # It was the afternoon Vernon Jordan Sr. walked, with great pride, from his house at 698 East Ave. to the old ballpark on Ponce	1	1	1
218	2	house where she lives attended the ceremony. She cried, she says, from pride. # " I made some positive changes here, " she reflects. "	1	1	1
219	2	? Sand like this -- fine, sugary white and toe-ticklingly soft -- is the pride of the Emerald Coast. Dr. Beach (aka Stephen Leatherman), the Travel	1	1	1
220	2	grandmotherly but bright-eyed, engaging and friendly, talking with ease and a touch of pride about her path to etiquette fame. # The fact that San Francisco's manners	1	1	1
221	2	# But the synagogue still stands. And Karon and Siegel, as stubborn and proud as the building itself, are determined that it be preserved. # " As	1	1	1
222	2	'll leave the light on for you. " # Tom Bodet would certainly be proud, but if you didn't know any better, you might suspect having mistakingly	1	1	1
223	2	every style imaginable. # Here's what else you'll find: a fiercely proud community, diverse but historically black, determined to maintain its legacy of close-knit neighborliness	1	1	1
224	2	to teach. " I got it for you! " he said with a proud grin. # Marvin Gomez, 10, said he hears gunshots " every couple	1	1	1
225	2	, just in time for one of the darkest seasons in the history of that proud program. He broke his ankle playing pickup basketball and had to sit out as	1	1	1
226	2	really is as big as a house. " # Norman Bridwell, Clifford's proud creator, never thought his dog would fly. " After 27 years, it	1	1	1
227	2	ministry's bureaucrats. " They are demoralized. They are a group of very proud people, but they made an awful lot of fallacies. They've blundered so	1	1	1
228	2	have kind of gotten used to it, " she said. " They're proud of it, too. They'll tell kids on the bus,' you	1	1	1
229	2	Mr. Salazar wrote. Kike Rosales, a history buff, television commentator, and proud Tchira native says the " gocho arrecho " attitude is rooted in the region's	1	1	1
230	2	Graf, valiantly trying to maintain humility. # He had a right to be proud. It was the fastest run on March 1, the first day of the	1	1	1
231	2	washing into a bubbly wall of melody that would make Danny Zuko and Sandy Olsen proud. **43;8585;TOOLONG # Arapahoe Concert Chorale and Arapahoe Community College Choir, Monday, April	1	1	1
232	2	Iverson, too. He could ask him what's it like to be a proud, thin-skinned, pouty superstar in Philly. Iverson may be emotional and stubborn,	1	1	1
233	2	if Scott didn't occasionally listen. Anybody who can get through the thick, proud skull of a basketball superstar must possess a little talent for coaching. # "	1	1	1
234	2	Defense attorney Katherine Spengler cross examined Gumbinner. She asked if Holmes was " overly proud or excited " when he interviewed him. Gumbinner said Holmes did not appear to	1	1	1
235	2	In its 70-year history, the East Bay Regional Park District has done itself rather proud, acquiring almost 100,000 acres of land in 65 separate parcels -- a holding bigger	1	1	1
236	2	Citicorp were doing. When they got into trouble, I felt that even the proud Wriston's Citicorp would face a downfall. But then I saw John Reed turn	1	1	1
237	2	The English is nearly flawless. One popular post said simply, " Bi and proud! " with a thumbs-up emoji attached to the end. # The United Muslim	1	1	1
238	2	made of the same stuff as the early Christians, the persecuted Jews, the proud Poles, the blacks and Latinos. " In another outburst he proclaimed, "	1	1	1
239	2	sloppy writing and editorial style that can refer to Bob Dornan as a " ferociously proud... fighter " when it is apparent to anyone who has heard the	1	1	1
240	2	from Swiss army budget # ROMONT, Switzerland The Swiss army bicycle brigade, a proud part of the Alpine nation's sturdy defenses for 110 years, is set to	1	1	1
241	2	defense. # " Forty-two Scuds engaged, 41 intercepted, " President Bush told proud workers at the plant producing the Patriots. His televised visit, at the war	1	1	1
242	2	's still not ready for the heavyweight championship. # 9. Nebraska # This proud program has a new home, and the Big Ten has, in the combustible	1	1	1
243	2	at least wait until I'm gone. " # There is much to be proud of. During the Dooley era, Georgia has won 19 national titles and built	1	1	1
244	2	triple homicide in Knox County in 2010, the Dispatch reports. He also took pride in the opening of a new jail in 2002, reports say.	2	2	2
245	2	what I could tell in my few days there, they take a lot of pride in him. " # Schaap interviewed Porzingis' parents, Talis and Ingrida,	2	2	2
246	2	For him to feel like a major leaguer I think is something I take great pride in being able to help provide him. " # Bonding time # Other than	2	2	2
247	2	mad scientist, but he knows the room inside and out and appears to take pride in the large lab's unique characteristics. " No other high-voltage lab with this	2	2	2
248	2	Crown; 7:30 p.m. Wednesday, Violet Crown. " DamNation ": The pride that we feel in the engineering feats of damming America's rivers might be misplaced	2	2	2
249	2	in more than 40 years. Colorado proud It will be a huge moment of pride for many in Colorado. Orion was designed and built by Littleton based Lockheed Martin	2	2	2
250	2	cultural heritage is of black businessmen and women, and there is a lot of pride in that, " said Grimes, who is executive director of the HOPE Center	2	2	2
251	2	a game from behind the plate, " Gonzalez said. " He has taken pride and ownership of that pitching staff. " # McCann's backup, David Ross	2	2	2
252	2	east end zone to embrace his father Damon, whose puffy red eyes reflected his pride and joy. Moments after Wimberley defeated Argyle 21-14 for the Class 3A, Division	2	2	2
253	2	It's a big change, no question. Our employees have a lot of pride in their agencies and what they've done forever. But I've encountered a	2	2	2
254	2	reboot or reinvent our great American cities to reclaim the sense of place and civic pride that these cities once possessed, as well as ensure that no one is left	2	2	2
255	2	or the power of our military, or the size of our economy; our pride is based on a very simple premise, summed up in a declaration made over	2	2	2
256	2	said. " This is good for Asian Tour players. He has become our pride and joy. " # Shane Hahm, who covers sports for Seoul radio station	2	2	2
257	2	Angeles Coliseum that was referred to as the black Woodstock, Mr. Bell still takes pride:'' Here's this black guy from Memphis, Tenn., pulling together	2	2	2
258	2	of my grandpa, a man who lifted us with gentle hands, who took pride in his electric meat-slicer and his wife. The morning bent over me gray and	2	2	2
259	2	to lung cancer to cervical cancer to breast cancer. " # Brock takes great pride in the economy and efficiency of the Wise clinic, which costs just $26,000 this	2	2	2
260	2	just to see what we're doing, and that's a huge source of pride for little Freiamt. // (c) Copyright 2008.	2	2	2
261	2	is worth the effort. Since 1969, the cute street stand has been the pride of three generations of Tommy Parrinellos, the latest one an enthusiastic maker of coarse	2	2	2
262	2	Hill (1-5) at Forsyth Central (2-4) # THE SKINNY:Eagles showed some pride and looked good in their first win of the season last week. Can it	2	2	2
263	2	into criminals. # The fact that such fascist actions do not unsettle citizens who pride themselves on liberty is disconcerting at best, and terrifying, at least. #	2	2	2
264	2	talents of such young stars as Sidney Crosby and Alex Ovechkin, but he takes pride that the new rules and standards opened up the game and enabled them to take	2	2	2
265	2	stand in for the dimmer, grubbier recesses of the soul. But New Yorkers pride themselves on having more of everything than people in other cities do. If noir	2	2	2
266	2	winless entering the third week of the season. The Redskins and Cowboys have additional pride at stake, renewing a 46-year feud before a national television audience. # "	2	2	2
267	2	paper. # Timothy Knight, the current publisher of Newsday, said he took pride in serving Long Island, and he pointed to recent coverage from overseas, including	2	2	2
268	2	vans, which players then tried to commandeer for late-night excursions. He notes with pride that teams now fly and stay in nice hotels rather than just jump on buses	2	2	2
269	2	as the dismaying feeling that many Muslims are reluctant to embrace the liberal label with pride because it sounds somehow less authentic or wishy-washy. # During the exercise, I	2	2	2
270	2	have been in a long time, but I temper that with great appreciation and pride with how our guys conducted themselves this year. " # Change is clearly inevitable	2	2	2
271	2	now, the uncertainty, the unknown, the Saints can bring a sense of pride to them for that short period of time. " # Fans in Carolina cheered	2	2	2
272	2	. At 1 p.m. The Woodlands College Park High School students will show their pride with a community pep rally. Shoppers are invited to see the marching band,	2	2	2
273	2	said, " I know that the Rev. and Mrs. Rice would be filled with pride to see the daughter they raised in Birmingham, Ala., chosen for the office	2	2	2
274	2	they were able to beat the Hoopsters, it gave our girls a sense of pride and joy and feelings of accomplishment. # Based on The Post's story,	2	2	2
275	2	" It is not a nice picture. But for us, there's greater pride and comfort in how he lived. What's important for us is that he	2	2	2
276	2	687 # New Yorkers take a perverse pleasure in their city's superlatives. They pride themselves on its biggests and its bests, and congratulate themselves on enduring its worsts	2	2	2
277	2	cultural amenities. In addition, they can provide a sense of community identity and pride. # Urban centers are also intended to serve as transportation hubs. They are	2	2	2
278	2	the uneasy group. " But our job is to instill in you as much pride and excitement in these uniforms as we can. " # Five months into their	2	2	2
279	2	symbols on school property - and to freely express holiday greetings. " I'm proud we are standing up for religious freedom in our state, " Governor Perry said	2	2	2
280	2	to help animals. # " We are extremely proud of Pat. We're proud of all of our graduates, " said Deborah Kochevar, the veterinary school's	2	2	2
281	2	single panga, the rubber landing crafts. We English-speakers are the Dolphins -- and proud of it. Others are the boobies, penguins, tortoises, iguanas and so	2	2	2
282	2	second round of the city playoffs with a 71-63 win. # I'm just proud of our guys just how we've refocused ourselves, come together as a team	2	2	2
283	2	to establish Jamestown's offices and programs within Edison four years ago, and am proud to see the wide range of resources and services it offers. Because of Jamestown	2	2	2
284	2	nephews and nieces, she says, " They know who they are and are proud of it. " # She adds, " Hopefully, we are just on	2	2	2
285	2	we had more people watch it, " he said. " I'm really proud of the product, and I think we tried to hold true to what we	2	2	2
286	2	. " He was black, I was white; we were both gay and proud. We agreed that these were the happiest times of our lives. " #	2	2	2
287	2	he said.' Every time I see (NBA players), I am proud. People talk about him like,' Oh, he is sorry.'	2	2	2
288	2	or last year in the primaries. But I'm pro-life, have been. Proud of it. And -- but I'm not going to use that as a	2	2	2
289	2	stuck to his guns, he did both, and I couldn't be more proud. The church is going to benefit from his pastor skills, and from getting	2	2	2
290	2	profound effect on childhood illiteracy. # I have three children, and would be proud to have them as Harry Potter fans, as well. # Even though I	2	2	2
291	2	leader in this space is unequaled. And that is something we should be very proud of. " # That is typical bravado from Mr. Cotsakos, who likes to	2	2	2
292	2	our relationship with the neighbors, " Adriance said. Nevertheless, " I'm proud of this ranch despite its problems. They're not insurmountable. I think we	2	2	2
293	2	all alumni. When asked what high school we attended, we are ready and proud to say Lafayette High School. The Rockwood School District has always provided a good	2	2	2
294	2	1985, to present, the total is $ 3.6 million. # I am proud that Crews and I worked successfully in the past. I know he voted in	2	2	2
295	2	. Thank goodness we have our priorities straight. The higher power must be so proud. # CLAUDIA STERNBACH # Aptos # A LOVING VOTE # EDitor -- I want	2	2	2
296	2	's like a big bright light that I'm attached to. I'm so proud of the film and I'm so proud of the way I'm represented in	2	2	2
297	2	# Campbell, former Iowa Attorney General, and others in the field, are proud of the huge strides taken over the past 25 years in raising awareness about domestic	2	2	2
298	2	how they have seemingly grown up to be strong and caring. He would be proud of them, of who they have become. # " I was sad that	2	2	2
299	2	Alfie " (1966) earned him an Academy Award nomination. # Caine is proud of about half of his resume. On the plus side, there's "	2	2	2
300	2	" the area was a model of religious coexistence. It was the islanders' proud achievement. " In the southern part of the Malukus, Muslims built their neighbors	2	2	2
301	2	in business to make money, because we have stockholders.' Here everyone is proud of every one of these books. " # That feeling of pride, the	2	2	2
302	2	am proud to work in the Intensive Care Unit at P/SL, and I am proud to be associated with all of the nurses who work there. They are an	2	2	2
303	2	many projects that helped shape Irvine as a progressive city. " I am very proud to serve with somebody who is not afraid to take on powerful interests, "	2	2	2
304	2	Michael McKeon, Mr. Pataki's chief spokesman, said, " The governor's proud of the fact that we have thousands of supporters from every walk of life.	2	2	2
305	2	able to still show a lot of class and character. Everybody at Thornton is proud of them. " # The effect of the controversy only adds to the intensity	2	2	2
306	2	. I wanted them to think I ran a hardball campaign Machiavelli would have been proud of. I wanted them to know we beat the Democrats on their own turf	2	2	2
307	2	and who got large crowds at the festival, that's what I'm most proud of. " Earlier this year, Lidia Agraz replaced longtime festival executive director Heidi	2	2	2
308	2	next morning and read those statistics in the paper, I was very pleased and proud. But there was another statistic in the paper that morning that didn't get	2	2	2
309	2	'm attached to. I'm so proud of the film and I'm so proud of the way I'm represented in the film' cause it's the way	2	2	2
310	2	a big fall for us personally, " Post concludes. " We were deeply proud of the last record, and the fact that it didn't take off in	2	2	2
311	2	their child to be accepted? " she asks. Wiseman herself admits she feels proud when she drops off her sons at school and other children rush to greet them	2	2	2
312	2	Sports Authority thanking our Denver Broncos for an exciting season and stating that they are proud to be a sponsor of this amazing team. There was no finger pointing and	2	2	2
313	2	of the consequences if Pakistan conducts its own nuclear tests. # Karen Herbert is proud of New Zealand's tourist attractions; she just doesn't like having one in	2	2	2
314	2	. I'm pretty proud of myself. " # And she will always be proud of her son. Last spring, the Carrollton elementary school where he had attended	2	2	2
315	2	's first championship in 52 years with a parade the munchkins in Oz would be proud to call their own. # City streets were filled because of James' career-defining	2	2	2
316	2	well, everyone's contributed and the two points are there, and we're proud of it. Everybody is going to make a big deal about me playing Philadelphia	2	2	2
317	2	they should keep playing. It was a tough loss. But I'm very proud of the way we played. Kevin and Charles did a great job. Coach	2	2	2
318	2	Bowman) and the (No. 88 Sprint Cup) gang did this weekend. Proud of them guys. " # Notes # ? Team owner Rick Hendrick does not	2	2	2
319	2	think as healthy as it's been, it can get better. I'm proud a number of alums are reaching back out to us. " At least two	2	2	2
320	2	place. // I suggest that the writer find another subject for which to be proud. Maybe he can find pride in the fact that Britney Spears is from Louisiana	2	2	2
321	2	should the NCAA be? As a Florida State alumna, I feel nothing but pride toward the Seminole tribe. I think this ban shows the ignorance of certain NCAA	2	2	2
322	2	.. To represent Negroes in Atlanta, everybody in Atlanta, was a great pride of ours. Just a great day: people getting their act together to go	2	2	2
323	2	Center in Houston. " In Houston and outside Houston, we will be very proud to see the two Chinese players on the court in the NBA. # "	2	2	2
324	2	the Oakland Raiders finally selected his son in the sixth round, he beamed with pride. # Paul Murray was released in 2016 and now lives with his mother,	2	2	2
325	2	. # " It's beyond a regional specialty, it's a point of pride, " Morrison says. " Jalisco is the beating heart of a lot of	2	2	2
326	2	diocese, but I think at the same time, it's a point of pride for people locally, because they know their local bishop is representing them. "	2	2	2
327	2	Tribune account of the hearing. # " I still have the same amount of pride for this building and our criminal justice system, " he told U.S. District Judge	2	2	2
328	2	and bring those factors to the underperforming schools? My suspicion is that building neighborhood pride and parental involvement in neighborhood schools will be just as successful as transferring students all	2	2	2
329	2	27 INTs last season. For a two-time Super Bowl-winning QB with a lot of pride, expect him to come back stronger than ever. Pessimism: Last season,	2	2	2
330	2	her foal over to the stall gate to introduce him with what seemed like maternal pride. The babies are shaved shortly after they are born, the guide told us	2	2	2
331	2	Anev, now the EFSF's secretary general and institutional memory, says not without pride. " In a month's time we were able to set up this very	2	2	2
332	2	ensemble of Canadian Arctic performers. # The circus is credited with bringing hope and pride to many dispirited young people. # " My life got brighter when I joined	2	2	2
333	2	treatment. # Blacks overwhelming support for Barack Obama is an expression of joy and pride upon realizing that, for the first time (at last), one of	2	2	2
334	2	SUSAN RADULOVACKI, Atlanta // Our governor praying for rain isn't a matter of pride // A letter writer from Acworth recently stated how proud they were to have a	2	2	2
335	2	the family's support for Taylor, the middleweight boxing champ known as the " pride of Arkansas, " who had a title bout against Kelly Pavlik in Vegas over	2	2	2
336	2	. # And community leaders fear something intangible but vital will be lost: neighborhood pride. # Neighbors lose value # Selling a home can be a long and frustrating	2	2	2
337	2	blooming in a compost heap on Long Island, " he said. # Another pride and joy is Autumn Sunset, a modern climber that rambles up the trunk of	2	2	2
338	2	was apparent as he continued, " There is room for contrition as well as pride as we contemplate our Christian history. We, too, have to develop our	2	2	2
339	2	, disappointed that their own fathers weren't there for the occasion. # The pride is palpable after the assembly, as the men stop off to meet homeroom teachers	2	2	2
340	2	teams playing in Houston on May 8, it will clearly be a day of pride for fans of the two CONCACAF heavyweights. # The United States will look to	2	2	2
341	2	's said he's the product of at least two excellent cultures and is equally proud of both, which seems like a difficult position to criticize, " Kelley observes	2	2	2
342	2	messages to build a community, reporting on items of interest in a vibrant and proud Cleveland suburb. # Special projects coordinator Laura Johnston reviews Cleveland's latest starring week	2	2	2
343	2	to not be forgotten, " Paltani said. " We look forward to more proud moments like this one when Wyatt comes of age to hunt. " # Noteworthy	2	2	2
344	2	stop you. They're all at the game, " Carrico said. // Proud of its schools // The Bobcats were so good during the boom that hardly anyone	2	2	2
345	2	anybody who didn't beat up on his kid brother? Anybody who wasn't proud as hell when he finally made it? " # Hewitt works closely with Fager	2	2	2
346	2	exercises more positive moral fortitude than does the church. # A Mickey/Minnie fan and proud of it! # Rev. DOUGLAS M. DONLEY # Dolores Street Baptist Church # San	2	2	2
347	2	civilians in the elections that occurred last November. # It should have been a proud moment, but the vote itself was marred by days of ethnic violence pitting Conde	2	2	2
348	2	flag, whether it's being flown at the start/finish line or waved by a proud fan sitting in the grandstands. National flags will line the makeshift pit lane along	2	2	2
349	2	empty stadium, popping a catcher's mitt. " You want to do him proud, show him what you've got. " # Then, he makes a	2	2	2
350	2	community service and environmental stewardship marks the Collins family business. " I'm very proud of how the forest looks after all these years, " Maribeth Collins said at	2	2	2
351	2	But overall this week, I've been playing very good. I'm very proud with the conditions difficult as they are: wind, rain, gusty, swirly	2	2	2
352	2	Punks on Dope " (1975) # 14. PRIMUS # Led by the proud weirdo bassist Les Claypool, the group reinvented progressive rock for the grunge era.	2	2	2
353	2	said when we first tasted it. This is a very serious American wine -- proud to be outsized, with tremendous power but also, even at a young age	2	2	2
354	2	for him " in a sarcastic manner, " but that he was " very proud " of it. # * Asked about the role of the Supreme Court,	2	2	2
355	2	say Iran has a number of tools to make good on those threats and take pride in taking on a more powerful enemy. " This is not something they are	3	3	3
356	2	n't really care that it was male-dominated, " she says. " I was proud of that ponytail sticking out of my hat. " # She started going to	3	3	3
357	2	expect of black men, but that's not me. I've always been proud of my blackness. And I'm not going to be talked down to by	3	3	3
358	2	of American society since the country's earliest days, guns remain a point of pride for many Americans. Whether for hunting, sport shooting or personal protection, most	3	3	3
359	2	the modern world. And Christopher Columbus and his monument at 59th Street symbolize Italian-American pride, accomplishment and love of our diverse city.	3	3	3
360	2	quietly destroyed in August 2014. " They had become a monument not to interethnic pride, " Lessoff writes, " but to the perils of community building through generalized	3	3	3
361	2	150 years. " Treading different ground Spanish land grants are both a point of pride and pain among the generations of Hispanics who say they have been swindled out of	3	3	3
362	2	doctrine of noblesse oblige. When a profligate cousin scoffs at the family's " pride of race, " Balint gives him a thoughtful reply: " Nobody is unselfish	3	3	3
363	2	idols with feet of clay in a nation with few exemplars elsewhere to sustain fragile pride. # Even as the Pakistani team faced humiliating defeat by England in a game	3	3	3
364	2	of the country has taken notice, " Haley said. " We're very proud of what's happening not only in South Carolina but in the Southeast. "	3	3	3
365	2	fell into a generally receptive audience because the Libyan intervention is viewed here as a proud success for France and its military. Not only did Sarkozy rally others in Paris	3	3	3
366	2	Another year, another new class of band geeks from across the land joining the Pride of Arizona marching band at the University of Arizona. # You can catch a	4	4	4
367	2	Sheryl Crow, Steve Winwood, ZZ Top, and Keb Mo'. # Pride Fest, June 25-26, 3700 N. Halsted, (773) 883-0500; www.chicagoevents.com	4	4	4
368	2	a big difference between before and after Coach Pride. " # A member of Pride's first recruiting class, Billy Bissell, an all-state baseball and football player from	4	4	4
369	2	registering players ages 4-18. http: **26;1858;TOOLONG or **32;1886;TOOLONG Football // CAMP: The City Pride of AYF seeks players and cheerleaders ages 5-15. Jwan Banks, 703-499-7432, **26;1920;TOOLONG	4	4	4
370	2	was made in 1942. Gary Cooper played Gehrig. Who played Babe Ruth in Pride of the Yankees? # ... # I'd like to register a consumer complaint	4	4	4
371	2	are more an extension of his original campaign, which rallied people's sense of pride and resistance. One pictures a series of energetic young people giving their reasons for	4	4	4
372	2	, in the guise of Wilf's confession, offers a plausible scenario of cruel pride overcoming common decency. # " I believe that there is another man inside of every	4	4	4
373	2	the idea of visiting a male politician in his office is unthinkable. # ' Pride of all Afghans' # Sarabi's office sits in a one-story yellow building overlooking	4	4	4
374	2	Jovanna Martinucci, Ashley Murphy and Ashley Lynch all scored in double figures for the Pride. # " Everyone played great and I'm happy about that, " Shimko	0	0	0
375	2	...................... 3,505... 36.79% SHERRY ZIEGLER.................... 3,442.... 36.13% --- NORTHWEST SCHOOL DISTRICT PROPOSITION PRIDE 100.00% of precincts Yes 2,237 **44;12982;TOOLONG No 4,219 Failed --- PEVELY ALDERMAN, WARD 1	0	0	0
376	2	Blues Volume 2: Appalachian Haze, " made in partnership with the drummer Mike Pride and the guitarist Mick Barr. Each album will figure into an Irabbagast Records mini-festival	0	0	0
377	2	Stafford Centre, provide a stage for legends of yesteryear (Ray Price, Charley Pride, Glen Campbell) as well as pop and rock acts such as Johnny Rivers	0	0	0
378	2	Md.) Park on Thursday to tie the mark held by Zenyatta and Peppers Pride. By winning the $7,500 starter allowance race under jockey J.D. Acosta, 5-year-old Rapid	0	0	0
379	2	" # Pride has gone from the big-league dugout to teaching the basics. When Pride arrived, the biggest problem was the players inexperience. Players didn't know how	0	0	0
380	2	of finding them, they find us because of Curtis name recognition. " # Pride estimates his pool of potential recruits is between 20 and 30. " Half of	0	0	0
381	2	extra innings. The Angels won in 11 and clinched three days later. # Pride retired in 2008, at 39, after a toe injury made the decision easier	0	0	0
382	2	Stadium the night Pride hit his home run. He has pictures of himself with Pride in a Yankees uniform and another in a Red Sox uniform. # He was	0	0	0
383	2	grip the ball. " They were gripping it like a softball, " says Pride, who did not learn sign language until he arrived at Gallaudet. # Pride says	0	0	0
384	2	I was a fourth outfielder and pinch-hitter, " Pride says. # Scioscia says Pride was a terrific athlete and teammate. " He worked hard to become a good	0	0	0
385	2	friends did not believe the news. # " It was nerve-racking, " says Pride, who has a picture in his office of the Bison players piling on each	0	0	0
386	2	World War II), his statement'' I hate war' is given pride of place and is inscribed on a pile of shattered stone. Try to find	0	0	0
387	2	. # " He found it and left it on the boat, " says Pride, who lives in Moab. " So, I gave him $200 when I	0	0	0
388	2	" through April 26. Photography exposing the quotidian details of American life. " Pride of Place: Dutch Cityscapes of the Golden Age, " through May 3.	0	0	0
389	2	More information: www.discoverygreen.com. # Friday 12th # CONCERT KEEP IT CAJUN # The pride of Pilette, La., the Lost Bayou Ramblers will preserve a fine legacy of	0	0	0
390	2	adding one new client every five days, among them David Weekly Homes, Pilgrims Pride and American LubeFast. # " There's a greater recognition on the part of	0	0	0
391	2	least $1.3 billion in costs to the U.S. chicken industry alone, " Pilgrim's Pride, the nation's largest chicken grower that recently bought Atlanta-based Gold Kist, warned	0	0	0
392	2	Bookshelves stand where the theater seats used to be, and the magazine rack holds pride of place on a raised platform, under a simulated movie screen. Up on	0	0	0
393	2	I can say is that I have always been an independent-minded person. " # Pride started singing country music as a youngster, raising eyebrows. He often heard negative	0	0	0
394	2	smallish office decorated with Jaguar posters. Not surprisingly, the fabled E-type takes the pride of place behind his desk, which is littered with scale models of American hot	0	0	0
395	2	dinner, a live auction led by Star Radio's Don Bleu and music by Pride and Joy. 6 p.m. Sat. Fairmont Hotel, 950 Mason St.,	0	0	0
396	2	it as record companies divided record buyers by race. Since the 1930s, Charley Pride is the lone African-American to become a country superstar. # But Towns perseveres.	0	0	0
397	2	Pride's run. # " Do they really want another Charley Pride? " Pride asked. " And when I say they, (I mean) the industry	0	0	0
398	2	its farms. Other big poultry producers, such as Tyson Foods, Pilgrim's Pride and Gold Kist, generally contract with farmers to grow their chickens. They say	0	0	0
399	2	held after the screening at the Royal Oak Main Art Theatre as part of Reel Pride Film Festival, supported by the gay rights group the Triangle Foundation. # In	0	0	0
400	2	The renovated facility will include a new Valdosta Wildcat museum, a Wildcat Walk of Pride consisting of personalized bricks, and an artificial playing surface similar to the one that	0	0	0
401	2	six different teams at six different age and ability levels. Teams and classifications include Pride White (kindergarten through second grade), Glory White (grades 3-6);	0	0	0
402	2	a parallel, " he said. " I guess it backfired. " # Pride said his decision to run the cartoon " assumed that for others, as for	0	0	0
403	2	editorial cartoon was mine alone, and it was a mistake, " Editor Mike Pride wrote in a column that appeared Feb. 8 on the paper's Web site and	0	0	0
404	2	startup perspective, " said Mark Proud, CEO of Bridgeville-based automated solutions provider The Proud Co., and president of the Pittsburgh chapter of The Entrepreneurs' Organization. The	0	0	0
405	2	. Hoping to help first-time entrepreneurs steer their ships in the right direction, Mr. Proud, Ms. McKinney and serial entrepreneur and author Tom Panaggio outlined some of the most	0	0	0
406	2	their doors with their shoppers still inside.' # In an interview, Brett Proud executive vice president of global sales and client support for GuestLogix, described the jetliner	0	0	0
407	2	battling persistent health issues. He was 77. # Krause, who took great pride in his working-class roots in Albany Park on the Northwest Side, retired last spring	1	1	1
408	2	. (Photo: Ryan Garza, Detroit Free Press) # Northern soul fans pride themselves on going deep. Their interest is largely in the less-traveled stuff -- the	1	1	1
409	2	walk through and post pictures to social media. # New Line executives say they pride themselves on being frugal, even with bigger-budget movies. Blackwood, for example,	1	1	1
410	2	and kill people in a busy public setting. # British security officials have taken pride in their record of disrupting such attacks even as assailants in continental Europe have slipped	1	1	1
411	2	school pet peeve was unfriendly people, and he lived like that. He took pride in the fact that he attempted in every way possible to not be an unfriendly	1	1	1
412	2	, and it has been a humbling one. It is a source of great pride for me to be part of' Chicago P.D.' s' incredible cast	1	1	1
413	2	try anything they can to get extra rebounds and make extra plays happen. They pride themselves on their hustle plays. I know that. I've seen it since	1	1	1
414	2	in Rogers Park as well as the city and country. # Rogers Park takes pride in its diversity, making it a good place for newcomers to get their bearings	1	1	1
415	2	# " Each time we finish a saddle, there's a certain amount of pride, plus we know we've built something good for that customer, " Oliver	1	1	1
416	2	and millionaire sportsman named Fred Zollner, totally uninvited and coolly received, moved his pride and joy Zollner Pistons pro basketball team to Detroit from Fort Wayne, Indiana,	1	1	1
417	2	Lee Williams bought her house at 43rd and Emmet Streets 52 years ago and takes pride in keeping it looking nice. So when she received notice that her home was	1	1	1
418	2	's the kind of guy I want coaching for us. A guy who takes pride in himself. "	1	1	1
419	2	of the $1 trillion market in e-commerce. # And while most of these entrepreneurs pride themselves on thinking outside the box, what's needed for the box itself is	1	1	1
420	2	I come to be with my LGBT community and to enjoy life and to have pride and to be not discriminated against, and to have fun with my friends and	1	1	1
421	2	last couple of starts, " Machado said. " He puts a lot of pride and a lot of emphasis into it. Knowing him, his last two starts	1	1	1
422	2	, Hochschild said, because they no longer had jobs that were a source of pride. # In that way, she suggested, economic dislocation has, in fact	1	1	1
423	2	much larger goals. But part of the love of the sport is feeling real pride in accomplishments big and small, in charting one's progress through the hard work	1	1	1
424	2	# " I was bursting, " said Kathryn of the March invite. With pride. With relief. With a bit of wonder. # All his life,	1	1	1
425	2	knows the importance of getting today's kids interested in the hobby. He takes pride in offering a low-cost, high-quality family experience. He sees himself in the excited	1	1	1
426	2	do that. The economics may have been better in the KHL, but the pride of winning against the best in the world draws the true competitor out. "	1	1	1
427	2	you can grow a film into the culture, " Barker says. " We pride ourselves in having really targeted campaigns for each film and in having an eclectic slate	1	1	1
428	2	city of honking motorists, hustling bicyclists and hulking buses, Keith Nelson takes great pride in his own humble means of transportation: the unicycle. " It's the	1	1	1
429	2	of distinction under the state accountability system is commendable and should be a source of pride in a community, " said Commissioner of Education Michael Williams in a statement last	1	1	1
430	2	Thiessen, whose title is " queen " of customer care. " We take pride in doing things differently, " Gina Lazzari says. " If you really pay	1	1	1
431	2	plans for renovations and water meters, long-term transformation depends on homeowners and renters taking pride in their properties. " Cut the grass; don't put out the garbage	1	1	1
432	2	vocabulary when talking about his program. Being from the community, Zeller shows great pride in putting a product in play that makes it proud. The team has moved	1	1	1
433	2	, his days hurling for the Cuban national team behind him, but he takes pride in still being able to throw close to 90 miles per hour and toss more	1	1	1
434	2	so close, we hear every high note sung by hot oil and smile with pride as we survey the kitchen's reading material, including the " Momofuku " cookbook	1	1	1
435	2	with at least 25 starts. Mazzone said not missing starts was a point of pride for both pitchers. " Absolutely, " Maddux agreed. " I'd rather	1	1	1
436	2	things that's right up there. " The closest Bryant has come to expressing pride at his scoring tally came Friday in Boston. Always keeping a mind toward history	1	1	1
437	2	does not bode well for the hope of Americans who wish to again find that pride in possessing the beauty of a meaningful job that can support a family. Tom	1	1	1
438	2	consecutive aces by Honea put Redondo up 22-20 and the Sea Hawks held off the Pride for the win. " We worked really hard for this title, " Honea	1	1	1
439	2	, you're just two years younger than my dad. " A moment's pride in my accomplishment is dashed due to my apparent decrepitude. * * * * A	1	1	1
440	2	little less stressed when it strikes. She's worn that single mom title with pride, because she knew right away that it didn't matter. That it was	1	1	1
441	2	and labeled boxer shorts with a marker. " There was a leveling of my pride that happened, " Vierregger said. " For me to have to go in	1	1	1
442	2	a better report card than his sister. Andi Frisina has always taken as much pride in academics as she has athletics, so three years after her diagnosis, she	1	1	1
443	2	cowboy boots as an homage to her Texas roots. Bill's chest puffed with pride as he smiled at his bride. A rabbi and a priest presided over the	1	1	1
444	2	but also in their dining rooms. They champion old-fashioned hospitality and also take incredible pride in their wine programs, which makes dining at either place an even greater joy	1	1	1
445	2	block-out and he spins off it. " And now he takes a lot of pride in the rebounding thing. He knows that's something he's really known for	1	1	1
446	2	,' " Stiles said. " It's a community that still takes huge pride in honoring the vision. They have rules about cutting trees. They want to	1	1	1
447	2	first franchise quarterback in D.C. since Joe Theismann in the 1980s. The Redskins took pride in winning three Super Bowls with three quarterbacks in the first Joe Gibbs era.	1	1	1
448	2	characterized by beautiful gardens, Reed said. # " People take a lot of pride in their gardens, " she said. # A number of the houses have	1	1	1
449	2	. Here are some of his homilies: Live each day with courage; take pride in your work; always finish what you start; when you make a promise	1	1	1
450	2	is more about cooking by feel, " she explained. Home cooks take great pride in their knowledge of techniques and in their ability to finesse a dish by taste	1	1	1
451	2	of candied pecans (of which there could have been more). Macdonald takes pride in the ingredients made in-house, and those include a powerful horseradish mustard that needed	1	1	1
452	2	the developer for not delivering on promised housing. # And while Mr. Jeffries takes pride in his crossover appeal, Mr. Barron has made little effort to broaden his base	1	1	1
453	2	last week, banging a fist on a lectern. " They keep violating our pride, but we will make them pay. We will make them walk around like	1	1	1
454	2	produced a remarkable legacy in the arts. " He added that WPA workers took pride in what they did and learned as they worked. The skills they acquired or	1	1	1
455	2	long arms with which to wrap ballcarriers and wrestle him to the ground. Takes pride in his ability to finish and complete tackles. Plays with a fighting mentality and	1	1	1
456	2	highest honors. # As they think back on their service as Montford Point Marines with pride, not sure what to make of the years it has taken to get to	1	1	1
457	2	2-acre farm, the master sommelier is on a natural high. He gushes with pride as he shows off rare black cherry tomatoes, figs, squash blossoms, painted	1	1	1
458	2	the entire cost of the renovations was tax deductible. Mr. Samalin said he feels pride in owning a restored historical building, and his staff and clients love the space	1	1	1
459	2	now quick to add that it is no more or less sinful than their own pride or greed or lust. They agree with Bakker that when it comes to sexuality	1	1	1
460	2	's credibility or ability to proceed. So far, political parties have also expressed pride and confidence in the balloting. # " I don't think any election process	1	1	1
461	2	suspenders and all. # Hooks wears the mantel of " rural legislator " with pride. He was named the 2010 legislator of the year by the Georgia Rural Health	1	1	1
462	2	. " It's a very proud moment. " # Now those moments of pride -- pride in his handiwork, his colleagues, his country -- are ending.	1	1	1
463	2	a high school diploma. # He talks about his blue-collar Chicago upbringing and taking pride in being able to wake each morning and go to a job. # "	1	1	1
464	2	to some Republicans. Frederick was infamous in Richmond as a dynamic legislator who took pride in resisting compromise and making flamboyantly headline-grabbing statements, such as when he said that	1	1	1
465	2	from 7 feet away. He said he's an animal lover and only took pride in knowing he was protecting the community. # " All these animals have the	1	1	1
466	2	his classes: It's a way for people to strengthen community connections and experience pride of accomplishment. " My goal is to tell as many people as possible how	1	1	1
467	2	the support you provide to our community. You have every reason to take great pride in the work you do. # Reagan wants you to know that she thinks	1	1	1
468	2	person, " said the passionate coach. " I think all coaches try to pride themselves in God is first, family is second, football is third. But	1	1	1
469	2	says his neighbor has 30 acres for sale. # Gordon, though, takes pride in being frugal. He blanched when his wife suggested putting up the family at	1	1	1
470	2	, because'' it's two plus three.' # And he takes pride in responding to a challenge in typical Jordan fashion. Marcus, who is averaging	1	1	1
471	2	you throw up much? # Marczyk: I am not a vomiter. I pride myself on my ability to moderate. # BH: What's your midnight snack	1	1	1
472	2	fix the delivery system of health care. Considering myself a conservative-leaning independent, I pride myself on learning about issues and candidates before an election, then voting for the	1	1	1
473	2	was pastry chef and partner at Palena for seven years. " He takes great pride in making everything himself. " # Ruta didn't have dreams of becoming a	1	1	1
474	2	Heritage Center (9283 S. Colorado 67, 877-858-4653) is the city's new pride and joy, an 11,600-square-foot visitors center along the highway that overlooks the town and	1	1	1
475	2	" # Today, the small businesses offer a way for gang members to take pride in their lives and gain financial security. Eva Napa works in the barber shop	1	1	1
476	2	each other on whatever instrument was within reach. # Bach was equally bound by pride. In the music world, Vincent Bach is synonymous with cornets, trombones and	1	1	1
477	2	does. I sincerely hope and believe it will serve as a point of Aggie pride for many years to come. # Gig' em! # - george bush	1	1	1
478	2	LaWanda Johnson loves buying virtual jewelry gifts for her online avatar friends and beams with pride when she sees them wearing necklaces she bought. # Johnson, who is on	1	1	1
479	2	around at least since the late 1990s when the economy was humming and CEOs took pride in making the list of best CEO golfers published by Golf Digest every two years	1	1	1
480	2	powder blue. It was an emotional thing. Over the years, we took pride in wearing black, and there wasn't that same resolve wearing the other.	1	1	1
481	2	end legal segregation in Houston peacefully. # But Mease said his greatest point of pride was helping end legal segregation in Houston peacefully. # The city had been calmer	1	1	1
482	2	Both statistics demonstrate the ability of the Tunnel Workers Union. # " They take pride in their work, they're physical, and they work well together, "	1	1	1
483	2	have been disastrous for a girl. # " My name is a source of pride and confidence, " Thomases says, adding that she is often reinforced with comments	1	1	1
484	2	(or) a trophy for leading the points after 26 races.... Our pride (with) winning the championship will mean a lot more than leading the points	1	1	1
485	2	local chapter of the Urban League. # But Mease said his greatest point of pride was helping end legal segregation in Houston peacefully. # But Mease said his greatest	1	1	1
486	2	more than 200 federal felony fraud convictions saving taxpayers over $300 million. I take pride in making a positive difference. # jalancatesgmail.com # Two options you might explore:	1	1	1
487	2	go out and play our style of football, " Magee said. " We pride ourselves on being faster, more athletic and more physical than the competition. But	1	1	1
488	2	. Tech // Comment: A YouTube staple with his seismic slams, he takes pride in his defensive abilities. // Golden State C+ // No., player... Ht	1	1	1
489	2	a point. // " At the same time, there are clients who take pride in asking these girls to give them a blow-dry, or getting a manicure or	1	1	1
490	2	lasted a couple of hours, and then we went home. With lots of pride. // K. Smokey Cormier Oakland // Editor - Our first Gay Pride Parade together	1	1	1
491	2	; it represented resistance to injustice against African-Americans. // " It was the most immense pride I ever felt at any event in my life, " said Rodgers, the	1	1	1
492	2	, she's got a master's degree in psychology. // " There's pride in being able to take care of yourself, " says the Columbus, Ohio	1	1	1
493	2	that out of all the rooms in a home, many Indians take the most pride in their kitchens. Truly, we love food, and our life surrounds it	1	1	1
494	2	in the world makes me a dissident, then I'll wear the title with pride. " # " It's the most eloquent speech on the universal values of	1	1	1
495	2	" I know you couldn't, Mum, " he smiles, bursting with pride, and adjusts an unruly bunny ear. # Campbell, too, is delighted	1	1	1
496	2	at his garden and doted on his black Alfa Romeo. " That was his pride and joy, " said Noreen Foley, 63. " He worked on the	1	1	1
497	2	67003 # At 4 feet, 8 inches and 85 pounds, Hamida Alami takes pride in defying the rules of conduct for elderly Afghan women. # Her most rebellious	1	1	1
498	2	# Helen Holdsworth, Executive Director of the Texas Brigade, said the Brigades take pride in not being a typical summer camp. # " Out true mission is leadership	1	1	1
499	2	. # The fish at Sebo is thrillingly fresh, and the chefs take deep pride in offering an immaculately seasonal nigiri selection. Try gold bream ($8),	1	1	1
500	2	a lot of talent and experience as a company and have taken a lot of pride in our prior shows, " the Cy-Fair resident said. # " We feel	1	1	1
501	2	instructor on a Nabor's Drilling training rig in Casper. # It's a pride many roughnecks wear on their sleeves. Old hands talk about the oil field as	1	1	1
502	2	a good catcher for us, " Rothschild said. He takes a lot of pride in it, and he's improved in every phase. " # That includes	1	1	1
503	2	. " It's me vs. you for usually a sum of money or for pride to settle the score, " he said recently in an interview with the Chicago	1	1	1
504	2	way, " Coles said. " As football players, we all have our pride and ego. Once I got past that and started really thinking about the advice	1	1	1
505	2	get us back in it. " # " This guy has a lot of pride. He's not going to go out there and get beat around for $9	1	1	1
506	2	. " " They coalesce around their family and their language. They take great pride in what they do. " # Marie's family arrived in Grandview to orchards	1	1	1
507	2	the sitting president nor vice president was on the ballot. Presidents are bound by pride to champion their own records, and vice presidents are bound by loyalty, and	1	1	1
508	2	spotty academic record reminds him not to give up on anyone. " Some take pride in getting the highest grade on the test. Some will volunteer for the demos	1	1	1
509	2	the right way, from a team spirit to practice habits to unselfishness. My pride level won't change based on any result. # " I think the results	1	1	1
510	2	Davies died in 1998, and it was with some sadness, and also great pride, that Jamie completed this year's circuit of anniversary celebrations held at the Diamond	1	1	1
511	2	Music Review 57641 # At Wheatley High School, time stands still. A deep pride that took root when the school opened 78 years ago has not waned. #	1	1	1
512	2	Tracy Murray from Portland for Otis Thorpe and Marcelo Nicola. # The result: Pride of Sterling High and University of Houston comes home to help Hakeem Olajuwon make it	1	1	1
513	2	with police officers trying to keep him from the search. The women spoke with pride about their contribution and the connection they felt with Wallet. # " He told	1	1	1
514	2	just really excited to be editing a really visual magazine. " # Kelley takes pride in San Francisco's investigative work, including pieces that went after top managers at	1	1	1
515	2	psychic enjoyment by playing games will make up for some of the lost identity and pride in work. " # The real impact of distraction # A central question is	1	1	1
516	2	, Ms. Ziskin said. While at Fox 2000, she pointed out with considerable pride, she had produced the ultra-violent " The Fight Club, " which was hugely	1	1	1
517	2	's Roman forum once stood now join the past and present. Faces alight with pride and pleasure, the dancers move to left and right. They raise their hands	1	1	1
518	2	of Calhoun had the unenviable task of apologizing and trying to soothe Muhammad's injured pride. # Glimmer of hope # The day's trials still weren't over.	1	1	1
519	2	# Game developers, though, once worked in relatively small companies and took enormous pride in the products they created. Now, amid a consolidation that has put the	1	1	1
520	2	and ask you for your autograph and all that, I take a lot of pride in that. And the competition. I feel that it's not going to	1	1	1
521	2	back against it, Harold and Kumar are motivated less by a sense of wounded pride or profound injustice than by a familiar individualist exasperation. They just want hamburgers (	1	1	1
522	2	school, " his mom says. " Plus, he had a lot of pride in whatever he was doing. He always wanted to be better than his classmates	1	1	1
523	2	and asked them to look after his family farm, " filled me with great pride and joy. " # She later said the death of a girl in her	1	1	1
524	2	protest on the Capitol grounds. But years later, he admitted that in his pride for the bravery they represented, he had kept the medals that went with the	1	1	1
525	2	years old and a fiercely independent single mother of three girls. # " My pride was a little high, " said Spinato as she looked around the immaculate living	1	1	1
526	2	a positive co-parenting relationship overnight. # They point to hard work, swallowing their pride and creating a support network to help them maintain an amicable relationship. # Rees	1	1	1
527	2	Barrett, states: " Barrett Station: Rich in Heritage, Education and Community Pride. " But the town is haunted by a dozen killings that have gone unsolved	1	1	1
528	2	cultural imbalance. " # But many people thrived in the demanding atmosphere and took pride in working at Putnam. # " I'd go back there in a heartbeat	1	1	1
529	2	so soon, " Frese said. " They've played with a lot of pride. " # Freshman guards Kalika France and Shay Doron have been major reasons for	1	1	1
530	2	, her expressive face framed by dark curly hair, smiled, saying with quiet pride and satisfaction: " That's how community spreads. " # Where to go	1	1	1
531	2	says, should be more revered as an innovator. # " For their own pride and understanding, blacks should know who he is and how important his work is	1	1	1
532	2	. Even a clear personal knowledge of unworthiness of such confidence can not overreach the pride that I feel. " # A few weeks later Eisenhower entered the New Hampshire	1	1	1
533	2	out, " Dec. 18). Why any black woman with an ounce of pride and dignity would want her children to be proud of being related to this unapoligetic	1	1	1
534	2	So I got up and pushed him out the door, " Rebhan recalls with pride. " I came so close to flinging his phone way out over a ledge	1	1	1
535	2	he Isakson has voted with us, " Fields said. # Isakson points with pride to a signed " thank you " from President Bush for his support of the	1	1	1
536	2	show would be Ford's sixth Springsteen show this year. She said it with pride; many This Train member knows the exact number of shows he or she has	1	1	1
537	2	a pair of shoes, he says, " I kind of went beyond their pride - I talked to them, like, just put your pride aside a little	1	1	1
538	2	, the green carpets that surround the town's beautifully preserved antebellum homes -- the pride of Madison. # In the midst of all this greenery, nestled at the	1	1	1
539	2	laugh and warmed the hearts of lonely servicemen. Katharine Hepburn showed us elegance and pride in every role she played. Fred Rogers became a fatherly television friend to generations	1	1	1
540	2	many old Confederate comrades and, in one letter to Beauregard, wrote about his pride at helping design the battle flag. # " He would be absolutely astounded that	1	1	1
541	2	now I have to work to feed my family, " Mahmad said with both pride and regret. " I'd like to study to be a mechanic some day	1	1	1
542	2	have something similar, but not as extensive -- it is a great source of pride for the environmentally conscious Davis. In the large driveway, littered with employee cars	1	1	1
543	2	a chance to be what he had never quite become, partly because of his pride, partly his stubbornness: a star. # Whether they could understand that or	1	1	1
544	2	a relatively young team of engineers. # " You get a lot of individual pride when you know that your particular system, maybe the screw or the nut you	1	1	1
545	2	is the ultimate individual honor doesn't mean an individual should get too full of pride. # Coming down! # We understand people who lose their temper. Everybody	1	1	1
546	2	He also expanded his original hotel chain. # Ebbers viewed his outside ventures with pride. With childlike excitement, he once gathered top WorldCom officials in a conference room	1	1	1
547	2	Latham, her sister-in-law. # That sense of duty brings with it an individualistic pride, a belief that history is crafted by the actions of specific people and not	1	1	1
548	2	with and committed to the cause of human rights of individual citizens and we are proud of it. # Dannemeyer speaks only for Dan nemeyer, certainly not for "	1	1	1
549	2	in all but name through her course work. Looking back, Bonnie Belcik is proud of the fact that she's made it in male-dominated workplaces. As with her	1	1	1
550	2	men, the tide of the Civil War was turned. History. But as proud as I was, I was also very aware that it took 125 years after	1	1	1
551	2	, not just the cool Web sites the company creates. One thing he's proud of: a beefed-up health benefits package. It provides more coverage for employees and	1	1	1
552	2	the Republic Gardens on U Street when he was 13. # " I was so proud, " he told The Post in 2005. " I made a dollar,	1	1	1
553	2	is there to work with them to help make a difference. # I am proud to be a volunteer for Easter Seals. I salute WGNX/Channel 46 for believing in	1	1	1
554	2	There's things in my life that I've done that I'm not too proud of. I'm a recovering alcohol and drug addict.... There	1	1	1
555	2	, he might be a featherweight or lightweight boxer. # " I'm very proud of what I've done, especially when I didn't think I'd be	1	1	1
556	2	retirement for federal judges, at " probably 80. " # " I am proud to have promoted a pragmatic approach to judging during my time on the Court,	1	1	1
557	2	considered failures if they don't win the World Series. " We're quite proud of what we've done the past five years, " he said. "	1	1	1
558	2	week. But it's just a great thing. I couldn't be more proud, more excited. It's very cool. I know our parents feel great	1	1	1
559	2	State College, nearly every storefront window on College Avenue displays signs that read " Proud to support Penn State football " and " Proud to support Penn State academics.	1	1	1
560	2	cool to be cheap, and thrifty is empowering. # " Now people feel proud about having been smart about their savings, and they can't wait to tell	1	1	1
561	2	At the same time, he said, " she still seems to be very proud of her discipline, of her ability to carry out orders without question. "	1	1	1
562	2	Obamacare, like religious liberty, like life and marriage. And I have been proud to fight and stand for religious liberty, to stand against Planned Parenthood, to	1	1	1
563	2	# Conroy made a studied effort not to be like his dad. He's proud to have kept a vow never to hit his children or wives. # Conroy	1	1	1
564	2	his opportunity. # " From the day I left for America, I am proud to say that I haven't touched drugs, " Santos said. " Thank	1	1	1
565	2	. Applications must be be postmarked by that date. # " I'm very proud to participate in awarding two college students with these $500 scholarships, " Idleburg said	1	1	1
566	2	a room with a bang, executing kung fu moves that would make Jackie Chan proud. His 18-month-old sister Tasya smiles and flirts with neighbors. Neither show signs of	1	1	1
567	2	said. " Frankly, I think it shows. " # Jim Little is proud of his work at Channel 4. " The experience of a newsroom does not	1	1	1
568	2	There are still scars from all those bug bites. Battle scars! I'm proud to show them off. // Any clue what you're going to do with	1	1	1
569	2	. My feet ache and my brain has turned to ratatouille, but I'm proud to have earned a graduate degree in tourism: Master of Superficial Glances. 58759	1	1	1
570	2	music. I'm a jazz lover. # Of what achievements are you most proud? Personally, I'm most proud of being a mother. Professionally, I	1	1	1
571	2	want to be a hot dog # Tara Trzinski is a weiner. # And proud of it. # The Arizona State marketing student is one of the stable of	1	1	1
572	2	chain that boasts 15 listings in the Chicago telephone directory. They are modest but proud. # " You can't really compare us to Marshall Field's, "	1	1	1
573	2	was so proud of it, " his mother said. " He was so proud he made crew chief. Some day he wanted to fly them. " #	1	1	1
574	2	ever vote for the people attempting these charades. # My husband and I are proud of having financially supported four Republican candidates. We have been treated only with respect	1	1	1
575	2	good for DeKalb County and what is good for Manuel Maloof. # I am proud of my successes as an elected representative in DeKalb County, and regret having been	1	1	1
576	2	Tags # Ellie is a crime and breaking news reporter. She's a proud Midwesterner, stationery hoarder and Earl Grey tea enthusiast. After interning at The Gazette	1	1	1
577	2	tone to describe the fast-paced process that produced the bill. " I'm very proud to say that, unlike the complete gridlock and dysfunction that we have seen in	1	1	1
578	2	he would have been so elated to come home and tell everybody here all the proud things he did, " his mother, Roxanne Kaylor said. " Now I	1	1	1
579	2	, and I take full responsibility for them. They are decisions I'm not proud of, decisions that haunt me to this day, but decisions you might have	1	1	1
580	2	someone edgy. But he did a professional job for us, and I was proud to be in a movie with him. " # Indeed, Douglas is sympathetic	1	1	1
581	2	to be Romanian.' " He said,' Oh, I am not proud.'... He put it in his desk. It was obviously painful to	1	1	1
582	2	O'Neill said Monday of his unusual journey. " I'm ecstatic. I'm proud of myself. " # First-year Colorado coach Jon Embree named O'Neill, a walk-on	1	1	1
583	2	" And I couldn't be any more happy, comfortable with myself, and proud. " EVAN AGOSTINI, Invision via AP # Actor Rupert Everett has said that	1	1	1
584	2	military from October 1960 to October 1964 and received an honorable discharge. I am proud of my service time and was recognized as good at my classification. # At	1	1	1
585	2	that time pale next to your card to " Dyr Vetren. " I'm proud to be your " Dyr Vetren ". I and the other veterans and active	1	1	1
586	2	they headed to Morocco, the Beats hashish-perfumed 1950s playground. Later, Richards was proud to be accepted in Jamaica's Steer Town, a ganja-fogged Rastafarian enclave where few	1	1	1
587	2	got pride and we're also confident in what we do. We're not proud of our record right now. We're definitely not proud of today. When	1	1	1
588	2	public schools. District 24 - Alice Nichol Adams County -- Adams County is rightly proud of its fine public schools, so a candidate who is a proponent of excellence	1	1	1
589	2	gets done. In the last 5 yrs I've attended 87%. I'm proud of my record, incl. creating CCLBA (200 homes!). But can	1	1	1
590	2	bankruptcy. // " People really do love the airline. I'm still pretty proud to say I work for Frontier, " said John Stemmler, president of the	1	1	1
591	2	salmon? The wealthy Mr. Keith is always trying, unsuccessfully, to convince the proud but impoverished Mr. Eames to accept a small allowance, just a little something to	1	1	1
592	2	going to lie next to his in the Hall of Fame and I'm damn proud. " # Yet he likely can't exceed his eloquence of Monday. #	1	1	1
593	2	n't guarantee global sales. 28946 # WASHINGTON -- An impetuous former governor battles a proud, stubborn senator for a diplomatic post south of the border, and a mild-mannered	1	1	1
594	2	values. They love a hand up, not a handout. They're a proud people. They're entrepreneurs, " Hernandez said. " Look at the guy	1	1	1
595	2	50 pounds. # A second-generation correctional officer, Pieper loved his job and was proud of the work guards do. But he began to seriously question some of his	1	1	1
596	2	the pathway of local community pride, balanced with a global perspective. I am proud to be a Titan and wouldn't trade my undergraduate experience at CSUF for anything	1	1	1
597	2	played by Die Antoord's Ninja and Yo Landi Visser). Although he's proud of his rabbit eared, battery operated automatons, Deon yearns to contribute something more	1	1	1
598	2	are not supposed to show emotion, but you could always see how pleased and proud he was (with victory). a I've never seen a president who	1	1	1
599	2	a chance to compete. # Q: Is this the thing you're most proud of - getting an agreement that changed the game and getting it without a work	1	1	1
600	2	all because they know what it is like to have nothing, and they are proud of what they have built in this desert landscape. They will not make a	1	1	1
601	2	here. And the level of secrecy would make the founders of the Dharma Initiative proud. # Producers have gone silent regarding details of the epic ABC adventure, which	1	1	1
602	2	owned very little at the time, compared to them. At first I felt proud, felt something like purity, amidst the clutter of things they now allowed to	1	1	1
603	2	Award. # Speaking with the Chicago Sun-Times then, Mr. Tigerman said he was proud to have maintained his artistic integrity throughout his career. # " If I've	1	1	1
604	2	2018 as a " Distinguished Warrior " by the Urban League. # Berg was proud of his involvement in guiding 18 Detroit Public School graduates, recipients of the prestigious	1	1	1
605	2	Winterstein, president of the National College of Chiropractic in Lombard. " I'm proud of it. This is a watershed moment in our profession. " # But	1	1	1
606	2	depended on their husbands for their sole sufficiency. A man had reason to be proud. Families were healthy and whole. # When women exited the home, they	1	1	1
607	2	housing climate in the nation, and we need to maintain that. We are proud of our good working relationship with the city, and we pledge to continue to	1	1	1
608	2	totalitarianism. # Inspired by the cartoon, the men, both lifelong Democrats and proud to be called " " liberals, " came up with the idea of a	1	1	1
609	2	advocates say the overhaul pays for itself within a few seasons. # Klink is proud of the fact he was the first to display dandelions at the Cincinnati Flower Show	1	1	1
610	2	executives at Simon &; Schuster whether they came to their house so they could be proud of the books they publish. They might say,' Well, of course	1	1	1
611	2	say that, can they? " she laughed. # The neighborhood remains quietly proud of its history. It's not as space-centric as it once was, but	1	1	1
612	2	" is an evolution on the $87 billion. Now John Kerry said he was proud. " (Mr. Kerry's campaign argued that Mr. Kerry has always stood by	1	1	1
613	2	tears - and her suffering - may have been real. And I'm not proud of my cocksure argumentation. But in a court of law, my decision was	1	1	1
614	2	Clinton tries to strike a balance. She often tells audiences that while she's proud to be running as a woman, she should be elected because she's the	1	1	1
615	2	her " whole entertainment now. " # That and her independence. She's proud that she still drives, has never had a ticket, and can still do	1	1	1
616	2	" method of finding supplies. # " One thing I've been kind of proud of is it hasn't taken big government grants to do this, " he	1	1	1
617	2	" I just told my players to keep their heads up, they should feel proud of themselves, " said coach Cliff Shelton. " I mean, they did	1	1	1
618	2	to have a talent like RobRogers as a political satirist. Will Rogers would be proud. " # At the turn of the last century, America's press employed	1	1	1
619	2	some fellow eighth-graders at the nearby Pearl C. Anderson Middle Learning Center already have the proud glow that comes with beginning to master computer skills. " I learned how to	1	1	1
620	2	World War II that you could be proud of serving. I think everyone is proud of it, " Adams said. " I've had a wonderful life.	1	1	1
621	2	game attended by the sportswriter Oscar Madison (Walter Matthau). Clemente was too proud to be seen hitting into a triple play, and the Pirate second baseman Bill	1	1	1
622	2	he has excelled at the game. He comes from a tough city, a proud city, that produces people like that. He plays with a chip on his	1	1	1
623	2	her career in 2010. # " There's a bit of me that's proud that I've come so far that they would ask me back, " she	1	1	1
624	2	the opinion that the peace prize was long overdue. # " I'm so proud I could burst, " said Philip Kurland, who helps run the Plains Trading	1	1	1
625	2	Wall Street and Madison Avenue made " Al " the tow-truck driver an unlikely but proud owner of a private tropical island -- at least on the TV commercial for Discover	1	1	1
626	2	black general would be in this house. I jus want you to know how proud we all are. " # POWELL'S SCHEDULE IN ATLANTA Retired Gen. Colin Powell	1	1	1
627	2	to the football field, " says Dooley, a starter. " We feel proud and special to know we turned the team from poor (3- 8) when	1	1	1
628	2	said Alan Sack, a former lover and longtime friend. " He was very proud. It took a long time before he let anyone get close and see his	1	1	1
629	2	Banc Alex. Brown. " There are still plenty of solid people who are proud of the work they do in the retail sector. They are just fewer and	1	1	1
630	2	he's fighting for the' fundamental freedom' of expression.' I'm proud to do it,' he says. CUTLINE: NEA's FROHNMAYER:'	1	1	1
631	2	, because he wanted the last name in the phone book. " He was proud of it. We were kids, " said one, who spoke on condition	1	1	1
632	2	in what we stand for. It was very important to him. He was proud of his heritage. Every one of his immediate ancestors served in the military.	1	1	1
633	2	limit and relishing the oh-so-deep V8 snarl. " The sound would make Steve McQueen proud, " I decided. # Actor McQueen starred as the hardcore, Mustang-driving police	1	1	1
634	2	centuries of czarism. Beneath the thin layer of colonial administration lay rich cultures, proud and resistant and flush with the fevers of national revolt. Each nation possessed a	1	1	1
635	2	a bouquet to you. And to those that participated: you can be very proud of your contribution. It is beautiful and I thoroughly enjoyed riding around and just	1	1	1
636	2	She tells friends how good she feels about her contribution. " I'm very proud, " Acevedo-Malouf said. " I'm very excited to one day find out	1	1	1
637	2	his Somalia tour ended 12 days later. # Richerson, 24, had been proud of his duty, seeing it as a chance to solve a problem and feed	1	1	1
638	2	there is plenty of time to be pessimistic afterwards, " she said, clearly proud of the quasi-family she acquired at the hotel. # She will miss the hotel	1	1	1
639	2	# " We saved all our lives for this time, and I was so proud, " said Alberta, who at 66 is two years younger than her husband	1	1	1
640	2	in their teeth to see what they were doing. # Q: You seem proud of the " Triple Seven. " # A: I like what happened.	1	1	1
641	2	hosting' 30s dances occasionally, hawking Depression-era merchandise, then we, as the proud town that we are, might just be able to impart some of our vibrant	1	1	1
642	2	truly heroic. He has an incredible passion. " # " I'm real proud, " says son Nick, 38, an ocean engineer. " He never	1	1	1
643	2	Steve Miller is the man in charge of replenishing the roster. For a school proud of its high academic standards, DU's hockey program has become a short-term NHL	1	1	1
644	2	since 2004. She ran unsuccessfully for mayor in 1995. She said she is proud to have successfully passed the nation's first living-wage law in 1994, as well	1	1	1
645	2	map in the most profound way since World War II. # He was too proud to resign, saying instead that he ceased to rule. He was a man	1	1	1
646	2	" I kid about it, actually, " Phillips said. " I'm proud of what I did. I worked hard everywhere I was, they paid me	1	1	1
647	2	world, not knowing if or when they would return, but we were all proud to serve our country, " Flavin said. # After spending a year at	1	1	1
648	2	25, 2018CreditCreditImage by Stephen Crowley/The New York Times # John S. McCain, the proud naval aviator who climbed from depths of despair as a prisoner of war in Vietnam	1	1	1
649	2	intelligent. He has had a heck of a month. He should be very proud of what he has accomplished. " # Bouncing back - Steve Avery, one	1	1	1
650	2	. History will have to judge that. # The other thing I'm very proud of, among others that I've just cited, is something that doesn't	1	1	1
651	2	scars and things they might have. You have to make' em look really proud that they are free now. " # She and other students are deeply moved	1	1	1
652	2	Carroll, his voice hoarse, shouted through the din. " I'm so proud, fellas, I'm so proud, that we are standing here, right	1	1	1
653	2	U.S. News -- who aced sociology last semester and has a B-plus average. A proud Chicagoan -- the city's skyline and'' 312' area code are among	1	1	1
654	2	# PARENTAL WARNINGS # Mom and Dad always said: # " Never be too proud to say' I'm sorry.' Just make sure you're not a	1	1	1
655	2	prior to the settlements. # He said that " the life insurance industry is proud of its long history of honoring its obligations to policyholders. " He also said	1	1	1
656	2	edges fluttered across the screen behind Mr. Cook as he beamed, looking like a proud child sharing his prized possession at show-and-tell. " Apple Watch is the most personal	1	1	1
657	2	, " the uncle said. " It wasn't much, but he was proud of it. " # As a child, Jason would roar up and down	1	1	1
658	2	And that doesn't come in just four years. # Boris should nevertheless feel proud at having reached the second round on such a historic and famous stage in front	1	1	1
659	2	community, Zeller shows great pride in putting a product in play that makes it proud. The team has moved back down to Division 2AA for the first time since	1	1	1
660	2	said. " I thought it was time for an apology and I was very proud to do it. Someone should have apologized a long time ago, " he	1	1	1
661	2	programs in the Houston area to hold the new accreditation. # " We're proud to have consistently earned the mark of quality from NAEYC and to be recognized for	1	1	1
662	2	to find Philadelphia on a map of the United States. Now I am somewhat proud of my knowledge of geography, but once you ooze into the mixed up gumbo	1	1	1
663	2	letters " LW " visible on the Devo album? Congratulations, I was the proud owner of the rare L.A. pressing! # Then there was an obscure indie single	1	1	1
664	2	, " Mora said of his tenure in New Orleans. " I'm not proud of quitting halfway through the season. But I'd do it again. I	1	1	1
665	2	thing you've ever done on assignment? What will you remember you're most proud of years from now? -- Ted Whipp; Windsor, Ontario A. An important	1	1	1
666	2	It stars Tom Wilkinson and Sissy Spacek, both terrific, as a restrained and proud, self-confident middle-class couple, Matt and Ruth Fowler. Their only son Frank (	1	1	1
667	2	decisions -- six to eight months -- on prosecuting cases: " I'm as proud to be closing cases as I am to be opening them, " she says	1	1	1
668	2	customer well: " Happy spaghetti and sausage to ya. And you're the proud owner of this great spatula " - he stalks the studio floor offering sausage nuggets	1	1	1
669	2	" He was handsome and strong. His classic tribal hairstyle, clothing, and proud bearing marked him as a leader of the A'ani. He was free from restricting	1	1	1
670	2	lugged their massive radios all the way from Texas to Boulder. They were quite proud of the new inventions, but, Galey writes, few found time to turn	1	1	1
671	2	I automatically think of my grandmother, how proud she was of him and how proud she would be now. And I'm grateful for all the veterans, so	1	1	1
672	2	" George is one of those kind of guys who's so big and so proud, he's the kind of guy who would die standing up, " adds	1	1	1
673	2	got victory cigars! " E-mail Anna Badkhen at **27;4051;TOOLONG 51886 # Christa Harrington was proud when she got her teaching job. # Four years of college and three of	1	1	1
674	2	, what with all those little trains chugging through amazingly detailed miniature worlds and their proud creators standing nearby to answer questions. The show's latest edition is set for	1	1	1
675	2	# Williams came home recently, his wife recounts, and " he was so proud. He told me that he had turned down 20 speaking engagements. " #	1	1	1
676	2	clinical care, and science-based teaching for the next generation. # " I am proud to have been able to have had such a strong impact on health science at	1	1	1
677	2	love your hate. # Mancow Muller, # WKQX-FM (101.1) # A proud school # It was the decision of the Whitney Young High School last year to	1	1	1
678	2	Aren't you? " # " This is like my skin, I'm proud to be in it, " said Lena Waithe, the actress and writer,	1	1	1
679	2	so many top actors like Richard are prepared to do it all themselves and are proud to do it. " # Caton-Jones, working on a smaller scale, compares	1	1	1
680	2	tries. Early on, his mind wandered. Rebelling against the god-like stature his proud countrymen foisted upon him, he sought escape in ill-advised romances, wild-hair intellectual pursuits	1	1	1
681	2	conditions, and there wasn't much to cheer. # Justin Rose was as proud of his 15 pars as his three birdies in a round of 69, which	1	1	1
682	2	, spokeswoman Melissa Sorola said. " We're available everywhere and we're very proud of that, " she said. " Our goal is to provide these new	1	1	1
683	2	the hell that is. Say it loud: I'm fat and I'm proud. 34166 # You could ask any of the members of the Mississippi State men	1	1	1
684	2	brings his art to life, which, after almost three decades, he's proud to say still doesn't involve a computer, despite how prevalent digital drawing tablets	1	1	1
685	2	car produces annually. # It's this story that encapsulates why I'm so proud to be a corn farmer. # It also highlights why I believe that in	1	1	1
686	2	what I saw and what I didn't see. Obviously, I'm not proud of it. " # These days, instead of would-be presidential assassins (and	1	1	1
687	2	/ Staff 42919 # It was a scene-stealing outburst that would have made Bette Davis proud. A bespectacled young architect was at a dinner party with friends back in the	1	1	1
688	2	for this process that you are going into now.' But they are very proud and they want to do it by themselves. I was involved in agricultural projects	1	1	1
689	2	extra weight he'd carried around on bad knees since his 40s. He was proud of himself as his pants sizes kept shrinking. Christmas brought a new wardrobe.	1	1	1
690	2	. # " There isn't anything we do here that I wouldn't be proud to show my mom or my kids, " said Rear Adm. David Thomas	1	1	1
691	2	post about the huge number of civilian casualties in the Gaza conflict. He was proud of the pie charts he had managed to conjure to go with his post.	1	1	1
692	2	Get what you need today in this early-morning email. # " The administration is proud of its record rehousing and resheltering thousands of homeless children, reducing the number of	1	1	1
693	2	file cabinet, confident that I was doing the right thing. I was just proud that I was contributing to the 401(k) plan at all, given the temptation to	1	1	1
694	2	said she obviously wasn't trying to hide the job, noting that she was proud of the new post and reported it in a local newspaper. # " The	1	1	1
695	2	I'm going to show them: how they can make themselves and their families proud. " # For more empirical evidence, researchers such as Asch are just now	1	1	1
696	2	particularly those that have helped the elderly. " It's a record I'm proud of, " he said. Their race may not get the same attention as	1	1	1
697	2	he does about his athletic background growing up in Oklahoma City (" I'm proud to say I hold two state records, for the longest anybody's ever thrown	1	1	1
698	2	a chef whose every creation is a work of art, he's not too proud to let you alter it with hot sauce. In fact, he encourages it	1	1	1
699	2	# 59% feel indifferent about living at home # 31% feel embarrassed # 10% are proud and happy to live at home # Source: Experience's 2006 Life After College	1	1	1
700	2	travel, Pacheco said in a statement and lengthy interview, is something he is proud of and is policy driven, with a big focus on climate change and the	1	1	1
701	2	his employer occasionally lends him the company pickup truck. # Rose Balula is a proud and serene woman who manages to care for her family and feed them well despite	1	1	1
702	2	School senior had completed all of her graduation requirements. # " I am so proud of myself, " said Lewis, 18, who dons her cap and gown	1	1	1
703	2	an email thanking them for a job well done. " I'm so very proud of the execution of a well prepared plan (that many of you developed)	1	1	1
704	2	at Yale " - he undoubtedly would have been immensely happy. But not insufferably proud. That, after all, would violate his own inviolable rule: No big	1	1	1
705	2	was a kind of bombastic excess and elegant elusiveness that would have made Tristan Tzara proud, not to mention Cantinflas and Liberace. The Los Angeles Times art critic Christopher	1	1	1
706	2	in this event, " Bustos said in a statement. # " I'm proud to have a 100 percent pro-choice voting record and I'm deeply alarmed by the	1	1	1
707	2	Army to get her feet back on the ground in a way she could be proud of. # What other sets of circumstances do our young men and women join	1	1	1
708	2	high school and spoke to his junior history class. # Robert Flavin is a proud World War II veteran, radar technician, and former educator, but his greatest	1	1	1
709	2	protagonist is a woman, as are her readers, wouldn't Milton Friedman be proud? It could mean the wants of the marketplace are being felt by manufacturers of	1	1	1
710	2	Alongi said, is the setting: New York, a town notoriously contentious and proud of it. # " Everybody says' no,' and we go from	1	1	1
711	2	hot summer's division of water, but for one day at least I was proud to be one of the workers. 7453 # MAJ. Nikolai Barsukov reaches down	1	1	1
712	2	giving money back to hard- working Colorado families is a noble cause and I'm proud to stand behind it. I would never, however, exploit the most vulnerable	1	1	1
713	2	" Jordan said. I came to grips with it before tonight. I feel proud about what I have done over the years. I'm happy with it.	1	1	1
714	2	sound meals to our children. They are dedicated and skilled workers and are very proud of their accomplishments. # Elliott's position with the GSFSA is voluntary; she	1	1	1
715	2	it makes me a better player. " # Hmmm. Sounds like running a proud NFL franchise that's suddenly trying to climb from a rare hole. What's	1	1	1
716	2	movie means to him: " It's done a lot to make me feel proud to know that I've done something good. " # Harry Flournoy # Forward	1	1	1
717	2	mines and other weapons. " # Kundert said he has never seen a woman proud of her war wounds as the men at least pretend to be. " It	1	1	1
718	2	. And he'll show it to you. # " We're all equally proud. " # As for Cishek's celebration, the pitcher said: " I	1	1	1
719	2	Dunford, he served Presidents Obama and Trump with distinction and has much to be proud of during his tenure as chairman of the Joint Chiefs. He's one of	1	1	1
720	2	" # Among those are fundamentalists like Tahma, the Americans say, who are proud of their attempts to hurt the US in Iraq. # " These guys,	1	1	1
721	2	, though more limited than he'd like to admit, is something he is proud of, but his willingness to share his fears tells his team to be wary	1	1	1
722	2	a student at Centerville and so was her dad, James Todd. Todd was proud to accompany his daughter and grandchildren in the Chesapeake Rotary Christmas Parade in 2016,	1	1	1
723	2	me, it's ideal for this part of the country, and I'm proud we have the opportunity to promote it. " # King says she would be	1	1	1
724	2	ago and the recent financial meltdown -- Stefanski has navigated the turbulence. He's proud of sculpting a bank that touts the best savings and mortgage rates, not bells	1	1	1
725	2	became the possible, " she said, " because I have never been so proud in my life to be a woman. " Correction February 8, 2019	1	1	1
726	2	accepted his permission and was set free. # " We have everything to be proud of and nothing to apologize for, " Ms. Miller said in an interview Friday	1	1	1
727	2	# Not many people dare call them that to their faces, but both are proud of it. # " My mother's my best friend, " Malone says	1	1	1
728	2	Performance program to encourage innovative teaching and improved student performance. # Mabry is also proud of its eighth-place ranking among Georgia's middle schools by the Georgia Council for School	1	1	1
729	2	think they are failures unless they go to a school where their parents would be proud to put the bumper sticker in their back window, " says Robert Schaeffer,	1	1	1
730	2	his experience as a state leader would shine brightly. # Governor Clinton is particularly proud of his record as an educational reformer in the poor, rural South. He	1	1	1
731	2	# Kudos to Jessica Posner for her work in Kenya. Denver should be very proud. However, please attend to the selfless work done by two Boulder kids in	1	1	1
732	2	is lukewarm. Critics agree this is not the schedule that will return the once proud Peacock to first place. # At the party following his presentation, NBC's	1	1	1
733	2	would love to be at 100 percent compliance with the ratings system, she's proud of what has been accomplished. # " Government officials hold up the Motion Picture	1	1	1
734	2	picked over for spare furniture, fixtures and sheet metal. # While he is proud of the changes, Mr. Flynn does not flinch when he describes the place:	1	1	1
735	2	I gained. Well, I gained eight but I lost nine. // He's proud of the ogreat little church he's led for 12 years and isn't worried	1	1	1
736	2	the likelihood of them having something happen in their lives that they're not supremely proud of, and not eager to hear the world weigh in on, is not	1	1	1
737	2	song, and the congregation belted out: # Big wheel keep on turning # Proud Mary keep on burning # Rollin', rollin', rollin' on the	1	1	1
738	2	Ward L. Armstrong (D-Henry) said on the House floor. " Are we proud of what we are doing?... This is silly. This is	1	1	1
739	2	to keep myself in good shape. What happened is something that I'm not proud of, but I don't have a drinking problem. " # For the	1	1	1
740	2	what you can do when you focus and put your minds together. I'm proud to be a badminton player, and happy I got the chance to experience winning	1	1	1
741	2	's here isn't worth the attention. Georgia should be proud. " # Proud, but apparently not content. # Although Blount said he's not " disappointed	1	1	1
742	2	ensure we can protect the most vulnerable animals among us, and I'm so proud that we're doing that. " # As for the cats rescued last week	1	1	1
743	2	have no idea what a meatball is. One day I ordered tricolored pate, proud that I was adventurous enough to sample such a local delicacy. It turned out	1	1	1
744	2	playing stump fiddle by the side of your table. Bill 44Doc Phelan is particularly proud of the fact he uses a wooden spoon to bang on his fiddle. He	1	1	1
745	2	time. # Whether honorable mention or top 100, all these employers should be proud of their hard work and dedication to " giving back " in their communities all	1	1	1
746	2	Hill in November, we learned, Judge Alito often cited his father as a proud immigrant who instilled in him empathy for minorities and the poor -- an empathy not	1	1	1
747	2	potential winner crystallizing in the future. And now here's LeBron James, the proud reigning two-time MVP, putting on a show the other night against the Charlotte Bobcats	1	1	1
748	2	your performance as chief, the department and the future? What are you most proud of? # A: There are several accomplishments which I have achieved since becoming	1	1	1
749	2	the way how things would be so there are no surprises. I'm very proud. I'm very thankful. " # Part of the 17-year gap in getting	1	1	1
750	2	the peace he was talking about -- speaking honestly and being honest with himself, proud of who he is and pride in his inner strength. Sure, he wants	1	1	1
751	2	4614 It's that time of year again when proud and prancing pooches from around the world vie for the coveted " Best of Show	1	1	1
752	2	allegations of someone with sour grapes, not founded in truth. I'm very proud of the time I spent at Freedom National Bank. I think I made a	1	1	1
753	2	And he no longer cared if he got a seat or not. He was proud and brave. Besides, what second grader worth his salt would be afraid of	1	1	1
754	2	into words the efforts I've seen the last couple days. It makes me proud to be a Windsorite. " // Scofield, in turn, was impressed with Vazquez	1	1	1
755	2	no, " the Davis campaign said. # Lungren countered that he was " proud " of his voting record, repeatedly portraying himself as a man of action and	1	1	1
756	2	2014, we identified 916 properties that needed to be demolished, and we are proud to say that we are 90 percent of the way there, " Waterman said	1	1	1
757	2	name. It's a charge she hotly denies. # ' She made me proud to be a woman' # Among fans, at least, the past is	1	1	1
758	2	isn't' exclusive' # There are many lists on which I would be proud to have the Lincoln Park Co-operative Nursery School. Most qualified teachers, warmest and	1	1	1
759	2	" not something I can relate to. " # " But I am a proud gay American, and I know I've been in situations where I felt not	1	1	1
760	2	go on the injured list to be available if Kelvin Cato got injured, a proud Oakley refused and was released. # " I didn't come there to get	1	1	1
761	2	you, we did. " # Disasters aside, the rivalry has known some proud moments. NU coach Pat Fitzgerald has been a part of three of them,	1	1	1
762	2	// Thaller is a dedicated " hypermiler, " one of a growing breed of proud miles-per-gallon geeks who painstakingly hone their driving techniques to lower gas consumption. They buy	1	1	1
763	2	a fitness legend rank among all your achievements? # A: I'm very proud of what I've done for fitness and grateful to Richard Simmons and all the	1	1	1
764	2	he taught me to be thankful I am free, he taught me to be proud to be me, " Rosacker's sister Samantha wrote in a poem. #	1	1	1
765	2	young and dry. Through the glass-surrounded lobby, I spot Holden, as the proud builder, casting an admiring glance at Dunaway, playing Newman's trophy girlfriend.	1	1	1
766	2	had raked in 40 percent of the black vote, a feat he is openly proud of. # " A lot of people said you're going to be wasting	1	1	1
767	2	" Dec. 18). That a human being can be so incredibly mean-spirited and proud of it is beyond my comprehension. It is interesting to see that she apparently	1	1	1
768	2	how others are jealous of him and his father for the success they are so proud of. # " It's kind of like about haters, " Colby said	1	1	1
769	2	part of this directive: Come for the wine. The Cork House is rightly proud of its small but lively list, which offers several dozen wines by the "	1	1	1
770	2	when health-care legislation passed in March. But the legislative effort he's " most proud of " was helping to lead the unsuccessful opposition to President Ronald Reagan's first	1	1	1
771	2	wrestler to win three medals in a career. # " " I'm just proud to represent such a great country as the United States, " Baumgartner said.	1	1	1
772	2	celebrity softball game during all-star weekend. Gonzalez grabbed the microphone. " Make us proud, " Gonzalez told them. " A couple bombs, that's all we	1	1	1
773	2	" he said. " Winning on tour is a great feeling, I'm proud of every tournament that I've won. But no one is going to tell	1	1	1
774	2	either. But faux leather vegan purse holding its own. (PETA would be proud.) Eat veggie burger. Finish this one, but only because famished.	1	1	1
775	2	seeking, look elsewhere. These two are squeaky clean: quiet, majestic and proud. # " This is going to be great, " says Rockets coach Rudy	1	1	1
776	2	told a radio audience, " I never sold out -- ever. I am proud to say I stood up for my people. " # After he left office	1	1	1
777	2	of the net, he also has faster reflexes. # Brashly confident and fiercely proud, he owns a 2.15 goals-against average, the best of his career, and	1	1	1
778	2	we talked in the past, you said one of the things you were most proud of was never having laid off an employee. You have more than 1,000 workers	1	1	1
779	2	. That's where you get a major advantage. " # Woods is most proud of the variety in his four-peat. In 2000 and 2002, he took control	1	1	1
780	2	of reliving a professional moment I'll never forget - and may not be completely proud of, of exposure to a whole new world of film that I failed to	1	1	1
781	2	office. Many chapters have their own offices and staffs. # The association is proud of its effectiveness in lobbying and advocacy: # - Alzheimer's disease is recognized	1	1	1
782	2	and Giambi knows it. If he does not exactly feel vindicated, he is proud of his success. # This is the clean Jason Giambi, he insists,	1	1	1
783	2	in Afghanistan, Schriock " really felt like something had changed -- and I was proud, because we've had lots of moments like that in this cycle. "	1	1	1
784	2	Lapierre said. " I'm really proud to be a St. Louis Blue and proud to be an NHL players. I ope I have a lot more games left	1	1	1
785	2	last month, includes a feature article about Khan, titled, " I am proud to be a traitor to America. " # A more well-known propagandist for the	1	1	1
786	2	. Green lawn sandwiching groomed base paths. Kids in smart uniforms, spunky and proud, like marchers on Main Street in a Fourth of July parade. # The	1	1	1
787	2	the end of the road that runs west from Pocasset, I will remember a proud man with his thumb stuck out in the warm June sun, walking so I	1	1	1
788	2	appointments the educator has received over the years. # " " I was very proud when I got selected for the commission because my life has been dedicated to opening	1	1	1
789	2	recently signed enlistment papers and will commence training to be an Army Ranger, a proud and honorable calling. # Secretary of State James Baker now instructs us that the	1	1	1
790	2	sweeten the universal theme of romantic paranoia. # 39. Creedence Clearwater Revival, Proud Mary. The choogling swamp-rock hit had listeners assuming the Bay Area band had slithered	1	1	1
791	2	her voice. For the last two years, she has been a loud and proud member of Transcendence Gospel Choir, the very first all-transgender choir in the nation.	1	1	1
792	2	he said. " I work hard for what I do, and I'm proud of what I do. " # His clinics are staffed by emergency technicians and	1	1	1
793	2	- is reflected in the tension and intensity of his art. # He is proud of not using art materials. He has, for instance, scratched pebbles -	1	1	1
794	2	, flew to Atlanta. He had to see his daughter. # In a proud declaration, Brian Vinson says of his childhood, " I knew who I was	1	1	1
795	2	union locals. " We're proud of the work we do and we are proud of our unions, " he said. " We'll march even if it	1	1	1
796	2	# The Beavers came up short of the CWS this season, but Rutschman is proud to be forever intertwined with Oregon State baseball as he enters the next phase of	1	1	1
797	2	know what the world's gon na think, but I could not be more proud to be a part of it. But I don't think I really knew	1	1	1
798	2	held; losing boxer did not compete. DQ: Disqualification. 25596 # Like any proud gunfighter, John Brunetti is loath to let on that he has been wounded.	1	1	1
799	2	veterinarians examine the dogs at checkpoints, and Mackey says the awards he's most proud of are the ones that cite him for best care of dogs. Abbott,	1	1	1
800	2	, a white and wealthy golf town whose black hired hands lived in segregated but proud enclaves like Taylortown, Midway, and Jackson Hamlet. # After living on New	1	1	1
801	2	I get mad. I can control my temper better. # " I'm proud of myself. It feels great. " Family Solutions brought 12-year-old Travis Feltman and	1	1	1
802	2	: ones that benefit wealthy estates, business property owners and smokers. Dayton is proud of policies he pushed for that brought the state from deficits into surpluses, and	1	1	1
803	2	teams and they make a lot of money and they always say they're very proud, " he said. " But if you don't play for the Boston	1	1	1
804	2	1997. Blazing? It was way beyond that. Not only did Woods bring proud Augusta to its knees with the lowest four-round score ever (270), but	1	1	1
805	2	do my best here. " # Like every other recruit, Washington is very proud of his accomplishments at boot camp. He believes the combat training he is now	1	1	1
806	2	# And King, who also promoted the first one back in 1983, was proud despite a crowd that fell far short of a sellout. # Five world title	1	1	1
807	2	he said. " " That's the reason for their stats. I was proud of the way we found a way to run the ball. " # Eddie	1	1	1
808	2	// " We have decided to be freedom fighters, and for that I am proud. People can discuss till their blue in the face whether or not we should	1	1	1
809	2	in " Nomad. " # We witness a wrenching deathbed reunion with her once proud Somali warlord father, in exile and on welfare in the largely Muslim ghetto of	1	1	1
810	2	Then the child will know that they may not win and they should still be proud for getting through. # ELIANNA GOLDSTEIN # San Francisco # . # A NEW	1	1	1
811	2	, less strong than figures in the St. Mary mural. The curtain was a proud man's response to diminished ability. # Another possibility # But another reason might	1	1	1
812	2	are East Indian and Chinese, said, " I just feel like I'm proud, and it upsets me. " But Wong feels he has to take it	1	1	1
813	2	LIVING without electricity in an isolated part of the valley, the girls were fiercely proud of what they had. # You could say they were living backwoods like the	1	1	1
814	2	from the early 20th century, the Cleveland Orchestra remains a steady source of civic pride.	2	2	2
815	2	with his daughter, busy with his Hollywood career. But she still took great pride in him, Rod Martel said.	2	2	2
816	2	We all grew up together in the same community. We have a lot of pride in our community. There was no way I could have passed this up.	2	2	2
817	2	my family want to be a part of it. We take a lot of pride in our city. " # Polk says the house is about 1,800 square feet	2	2	2
818	2	was unusual for Toronto. # " We are a safe city, and we pride ourselves on being a safe city, " he said. " Unfortunately, this	2	2	2
819	2	brother, too. Krystkowiak. All the people who've pushed him and take pride in his academic growth. " I didn't expect myself to have a four-year	2	2	2
820	2	, Vincent Blount, 55, reared three children. And it's filled with pride: from the china cabinet that displays her children's trophies and certificates, to	2	2	2
821	2	6177 Keith Deininger and his wife take pride in their high-achieving twins. After all, " Cosmo " and " Mojito "	2	2	2
822	2	them before we did anything else, " Slater said. " They take some pride in the fact that they're associated with state-of-the-art energy production. " With no	2	2	2
823	2	terrorized by a gunman on July 20. I can't help but feel enormous pride and happiness for the success that Missy has had in London this year, and	2	2	2
824	2	of Fort Collins, " Matz said. # " I remember the sense of pride for the city and everything, but the thing I really remember was the teamwork	2	2	2
825	2	on stuff like that. Obviously, like everybody else, I was filled with pride when President Obama got the nomination. # Q. When you won your Senate seat	2	2	2
826	2	. His mom giggles as she watches the video. # Such is the parents pride, they could be watching their son playing the heroic lead in a school play	2	2	2
827	2	' // In the Big Easy, Augustin's success has become a source of pride. L.S.U. remains king there, but Texas hats and T-shirts have been appearing since	2	2	2
828	2	it means more. " # Still, as Flores has felt a sense of pride for Dungy and Smith lately, the rest of the football world should feel obligated	2	2	2
829	2	that women's chief priority is to serve their families, she not only took pride in her two daughters' achievements but also encouraged our career plans. We took	2	2	2
830	2	And she is overjoyed to have Sarabi running the province. " She is the pride of all Afghans, not just women, " Rezai says. # A decade	2	2	2
831	2	, " Van Gundy said. " But it does not detract from my overall pride in the team, how they went about their business. But it does show	2	2	2
832	2	" that most collectors overcollect, so he often tapped into their patriotic and family pride and they were thrilled to give. What I respected most, " she said	2	2	2
833	2	. They want to be able to wear the school logo and school colors with pride and represent the school in that fashion. It's very subtle, but that	2	2	2
834	2	to study engineering at Texas A &M; University. # Palacio was 22, the pride of an immigrant family from Nicaragua who had found a home in the Army after	2	2	2
835	2	in 2002. Then they plan to get engaged, war or no war. Proud mom Linda Emmerling of Racine, Wis., hugs son Lerroy Smith on basic training	2	2	2
836	2	years old, Rojas was chosen to join the Industriales. His mother was so proud. " We sat behind the dugout and knew all the players, " his	2	2	2
837	2	of the season. The results have been great, obviously, and I'm proud of these guys and the staff. Everyone has made my transition enjoyable.'	2	2	2
838	2	less fortunate -- or those who fight wars on their behalf. # I'm proud to be a student at Georgetown. Though I find some aspects of campus culture	2	2	2
839	2	I'm proud of this team as a group, just as I've been proud of every team over the last few years. I don't worry about individual	2	2	2
840	2	: Eric and Gloria Bailey are serious about their finances. 25797 # As any proud mother would be, 82-year-old Helen Souter was glued to the TV Monday as President	2	2	2
841	2	, and makes suggestions for improvement, " the statement read. " We're proud of our emergency responders, who carried out many remarkable actions that night. "	2	2	2
842	2	be over 10,000 (fans) in there. We all have got to be proud of where women's volleyball is at in the state. " Sun taking	2	2	2
843	2	of his talent and his willingness to work hard and persevere. We are all proud of him and thrilled that we had a part in launching him toward his dreams	2	2	2
844	2	air campaign which has gone very well, and I can't tell you how proud I am of all of our airmen and what they've done in the last	2	2	2
845	2	and has a weekly movie night for the neighborhood kids. # " I'm proud to say this may be the best neighborhood in San Francisco, " said Cooks	2	2	2
846	2	. " # " Well done? " Bob asked. # " I'm proud of him and he did well.?.?. right? " Donna	2	2	2
847	2	very peaceful. I told him how I appreciated his friendship. He said how proud he was of me. I said, " I love you.' Then	2	2	2
848	2	after hearing the news, shook her head and said: " We're very proud of Carole. This is going to make quite a big hole in our lives	2	2	2
849	2	Clemons' took the time to salute a good kid who made his parents extremely proud and his world a brighter, happier place for all who passed his way.	2	2	2
850	2	, " Mr. Steinbrenner said. " He's his own man. I'm proud of him. He told his father,' Certain people in the commissioner's	2	2	2
851	2	ever known. # My two older sons, Austin and Erik, I'm proud of what each of you have become. We shared some of my greatest baseball	2	2	2
852	2	Our soldiers who have volunteered to go there understand the stakes and I'm incredibly proud of them. # Q. -- In the last campaign, you were asked a	2	2	2
853	2	government policies. # Instead of good government and principled leaders we can all be proud of, too often some legislators leave us embarrassed and ashamed - not so much	2	2	2
854	2	his mother. # Mote, who works for an insurance company, was a proud parent and had some of her son's mementos in her office. Thomas said	2	2	2
855	2	28-0. Head coach Terrance Riley said after the game: " I am really proud of our players and coaching staff. I watched our kids learn and grow throughout	2	2	2
856	2	. # " We grew up in a low-income home. My parents are very proud of me, " said Winkfield. " It's just been an awesome blessing	2	2	2
857	2	stay in touch, " UT coach Mack Brown said Thursday. " He's proud of the team. At the same time, like any competitor, he's	2	2	2
858	2	said. " They got three stops when we needed them, and I'm proud of them. # " Even though they struggled, the defense had to stop	2	2	2
859	2	# " My mom is so bad, " says Beth. " She's proud of me but she really embarrasses me. " # WALNUT CREEK'S PRIDE #	2	2	2
860	2	in the same spot for a while,' Ms. Marcum said. # As proud as she is of her husband's service, Ms. Marcum feels guilty that neither	2	2	2
861	2	. # Which award is the biggest honor? " Honestly, I'm equally proud of each, " Moore says, " though I would have been concerned had	2	2	2
862	2	extension 304. Scouting out talent, service Carlyn Romeyn can't help but be proud of her 14-year-old daughter, Kathryn, and her friend, Ashley Scott, 14	2	2	2
863	2	# Orinda # . # RIGHT ON THE ISSUES # Editor -- I'm so proud of George W. Bush's efforts to reach out to Latinos and stress education reform	2	2	2
864	2	come together and look how far it took us. # " I'm really proud of the younger players. I expect them to get a little further next year	2	2	2
865	2	market in March 2004. " I'm very proud of Shawn, and very proud of the fact that he went to the Redskins, because I always thought that	2	2	2
866	2	, " Siler Jr. said. " She told me I made her real proud when I told her I need to talk to a lawyer before I sign anything	2	2	2
867	2	on former Broncos linebacker Randy Gradishar not being elected: // " I'm very proud of Gary. Very deserving. I think he was by far the best left	2	2	2
868	2	helping help women, first responders and many others. # " She makes me proud every single day, " she said. " And mom: Grandma would be	2	2	2
869	2	no plans to become an American citizen. # " So many people are so proud that I reached so many goals coming from Africa, " he said. "	2	2	2
870	2	And the new, dynamic administration is on their side -- Mr. Trump is " proud " of the House bill and Secretary Price, for many years the main architect	2	2	2
871	2	public institution that far exceeds expectations and one that all San Franciscans can truly be proud of. # A recent comment, however, suggested that this wonderful new building	2	2	2
872	2	George to family reunions so he can meet the folks down here who are so proud of him. Perhaps one of these days, he'll make it. "	2	2	2
873	2	. # -- -- -- # In a weird, warped way, I was proud of him for finally asserting himself. I wished he had taken baby steps,	2	2	2
874	2	the 2:30 p.m. Sunday throngs at most U.S. Opens. " I'm so proud because this is my home town and everybody out there was so respectful. No	2	2	2
875	2	her name as Robin, said she was molested 58 years ago. " How proud I am of this woman for standing up. It is not your fault,	2	2	2
876	2	the classroom and on the football field, it's just like I'm a proud parent. " # Lindsay H. Jones: 303-954-1262 or ljonesdenverpost.com -- -- -- --	2	2	2
877	2	New York. He is grateful to " his good friend " Clemens and is proud of his friend's work ethic, describing it as one of the best in	2	2	2
878	2	. 70119659 # Diane Wittwer of Macomb Township is proud of her pierogi. But she never thought her pierogi with the pretty braided edge	2	2	2
879	2	his disappointed followers yesterday, Ross Perot declared, " The Founding Fathers would be proud of you. " But would the Founding Fathers have been proud of his electronic	2	2	2
880	2	her about this, " Louie says, " but I've never been so proud of her. I tell everybody. " # In the clinic, a palpable	2	2	2
881	2	maybe even as early as next year. # " I'm very pleased and proud of our group, " Cubs manager Joe Maddon said Sunday. " We are	2	2	2
882	2	us who do this kind of work, and we get along because we're proud to be from Houston and we do this because we love it, " Price	2	2	2
883	2	be akin to 1,000 sidekicks. Yet Cross also wants to make his former boss proud, albeit in a twisted way, by developing the state-of-the-art Yellowjacket suit and using	2	2	2
884	2	can't get enough seats for Theo's graduation. In real life, the proud father relates the story of Ennis's academic triumph: " He goes to college	2	2	2
885	2	introduce me and I said, " Max, as a Marine, I'm proud that you have the courage to come forward and say this. I know that	2	2	2
886	2	respect of this nation and the world. They are world-class champions. Georgia is proud of them and will never forget this group of young men, whether they win	2	2	2
887	2	Love versus Power and Money. It was kind of corny, but she was proud that he believed it, and of his loyalty to his team. For better	2	2	2
888	2	still plants a vegetable garden and does the trimming in her yard. She is proud the garden club has been active since 1939. # Over the years, the	2	2	2
889	2	be a " great job " to take him away. Jerry Toole, the proud father, isn't as politically correct. Eventually, he says, Andy will	2	2	2
890	2	nothing, the world's wide open to you. # " I'm very proud of what my daughter's accomplished, and I have the comfort of knowing she	2	2	2
891	2	to the city. The high fervor of religious spirit around me made me feel proud to be of the Catholic faith. Children of every race and color danced and	2	2	2
892	2	" said his mother. " So I just hug him and tell him how proud I am of him. " # Said Imamura: " You don't know	2	2	2
893	2	want, Allen, is you to be the kind of judge I'll be proud of.' I said' Your honor, I will be...	2	2	2
894	2	finger, why don't you point it at yourself. Weren't we all proud of that little bundle of innocence and excitement when she smiled into the camera and	2	2	2
895	2	reviews, then off to Cambridge for a meeting at Harvard. She says how proud she is of Austin, how amazed at his " tenacity, " how happily	2	2	2
896	2	a flag football game on the windy helicopter flight deck. " But they're proud of me. " # She felt " honored " to cut the cake on	2	2	2
897	2	not benefit from the changes because they were not retroactive, people say they are proud knowing that other communities, such as The Woodlands, have more protection. #	2	2	2
898	2	. # Barbara Bush praises " this honest, decent, hard-working man we are proud to call son. " George Bush announces that " the baton has been passed	2	2	2
899	2	, compete in the decathlon. Johnson had finished ninth. " I'm very proud of him, " added Johnson's mother, Carolyn, of Corvallis, Ore	2	2	2
900	2	and contemporary art and trying to understand what it was telling me, I am proud of Wellesley for exposing current students to a " sculpture " that gets them talking	2	2	2
901	2	power-happy cops capable of this sort of abysmal judgment. Inspector Javert would have been proud of these guys. # And for you law-and-order freaks out there who may be	2	2	2
902	2	the Cavaliers and Indians, and more. # " I think people are finally proud of their own community,'' he said. # Destination Cleveland, too	2	2	2
903	2	are fast enough to keep up with the flying Flames. # Collins also is proud of Banks, who had to hit the books to stay eligible. # "	2	2	2
904	2	big bus will come to take you to the first grade. I'm very proud of you. " # I looked for even the slightest flicker of regret or	2	2	2
905	2	convert to the Islamic faith. On Oct. 8, 1974, they became the proud parents of Rashaan Salaam. # The marriage broke up a few years later,	2	2	2
906	2	Ryan'' his grandfather, Varyl Raze, said. " I am so proud of you!'' # Kash Rasmus of Bemidji, Minn., shot this	2	2	2
907	2	people from all walks of life have come up to me to tell me how proud they are of me. I mean, people who look like big rednecks to	2	2	2
908	2	, the clown, absorbed the verbal assault, then said, " I'm proud of you Matthew, " and soon gave Hasselbeck his starting job. Mike Holmgren	2	2	2
909	2	, " she said. " And mom: Grandma would be so, so proud of you tonight. " # One of the dominant themes in the hours leading	2	2	2
910	2	football career ended. # " He was a deeply oriented family man, very proud of his two children, and had done some nice things for his mother,	2	2	2
911	2	Johnson's cousin, the jersey was symbolic. # " I'm just real proud of him, " Perry said. " I was so happy when he got	2	2	2
912	2	team owner Arthur Blank said. " To me, it's almost like a proud father when you see your kids grow up and they get along well. "	2	2	2
913	2	on stage, " he said. " The first two I'm really super proud of, and they only get better from there. It's a damn good	2	2	2
914	2	angry protests. But this was a night of celebration. # " I'm proud of my city, " Mayor Gavin Newsom said from the stage. " It	2	2	2
915	2	love your show and we're all so proud of you, " says a proud Conestoga High Mom, coming over to Grant Shaud, who was, to be	2	2	2
916	2	understand we had a great season. We did the unexpected, so we're proud of each other for that. " -- Lyles.	2	2	2
917	2	, " Pam said. " But you watch them, and I'm so proud of what they're doing now. " # Competitive Crew # The Barry boys	2	2	2
918	2	' # At Eglin Air Force Base in Florida, Michelle Griffin says she is proud of her husband but is angry about his death on May 13. Staff Sgt.	2	2	2
919	2	if we don't address the foreclosure rate, we aren't going to be proud of Denver. " # Stuck with same value # The neighborhoods with the lowest-price	2	2	2
920	2	agreement between the Examiner and Chronicle. # " I can't help but be proud that a Chinese American family is buying a great newspaper, " he said.	2	2	2
921	2	to hide so no one can see this old man crying. I feel so proud of you when I see you walking down that airport terminal. We all love	2	2	2
922	2	of authority. By doing so, we can all create government that we are proud of. # Jim Moore, Arvada # The writer is a former Jefferson County	2	2	2
923	2	or locked up. # We are proud for so many reasons. We are proud of our leaders of the past, we are proud of the fight in our	2	2	2
924	2	committed to building a winning program, one loaded with players who will make fans proud on and off the field. " Paul isn't a guy like the last	2	2	2
925	2	said much of the criticism came before the season started. " We are very proud of the caliber of players who play, " he said. Ackerman said that	2	2	2
926	2	complete-game victories, you must go back to 1928. # " I feel very proud of being part of the staff, " Contreras said. " It never crossed	2	2	2
927	2	last fall, Pol Pot was asked if he thought his young daughter would be proud later to call herself his daughter. " I don't know about that,	2	2	2
928	2	This team has really become a team, " Harbaugh said. I'm really proud of them for that. " # Roethlisberger still finished 25 for 44 for 330	2	2	2
929	2	Gruden said. " There's a great group in there I'll always be proud of. " # -- BY THE NUMBERS # 1 - Raiders' first downs	2	2	2
930	2	-- so audiences would be reminded of our range. But I am just so proud of the company. Look at the way my dancers work things out together he	2	2	2
931	2	point to mention Louisville, Kentucky, " Montgomery said. " He was always proud of his hometown, and we were always proud of him. He talked a	2	2	2
932	2	am the wife of a disabled Vietnam veteran, and he and I are the proud parents of a young man who has enlisted in our very own Illinois National Guard	2	2	2
933	2	'll say,' What's up, girl?' Terrell makes me really proud because he could be out there on the streets. " # Since arriving at	2	2	2
934	2	facilities there. # " Most of the people here are very excited and very proud that Franschoek has a colored mayor, " said Abraham Farmer, a prison guard	2	2	2
935	2	Dennis Wolff, his longtime rival at Boston University. # " I'm really proud of you, " Wolff said. " But what in the world was all	2	2	2
936	2	technology by installing 600 mobile data computers in patrol cars. # Gainer's especially proud of the department's new Joint Operations Command Center, a high-tech intelligence and communications	2	2	2
937	2	whom she met while making " Seven. " # " I was just so proud of him, just so happy that we were there in that capacity, "	2	2	2
938	2	been misleading to the newspaper's readers and unfair to the county that I am proud to serve. # The article, titled " Hosea Williams: A look at	2	2	2
939	2	need to mature a little bit. Ben has done that and we're certainly proud of where he is and the kind of person he is and hopefully he's	2	2	2
940	2	she'll be the first to graduate from college. # " We're really proud of her, " Sokho said. # Like her three sisters and one of	2	2	2
941	2	said Jonathan Wolman, the AP's bureau chief in Washington. " We're proud of Hebert's reporting on energy and environmental issues. " # Also scoring relatively	2	2	2
942	2	local banks charge 58 percent interest a month. # " True, I am proud of the role this shipyard played in changing the whole world, " Szyc said	2	2	2
943	2	obviously disappointed that not all of our campuses met federal standards, but I am proud of the majority of our students who continued to perform well, " Round Rock	2	2	2
944	2	. We know what he's done in the racing industry, and we're proud of him for what he's gone on to do after his bull-riding career.	2	2	2
945	2	" says Joseph, correspondent for the Mail on Sunday. " William is very proud of her, he wants her to be popular, he's not jealous of	2	2	2
946	2	, and I want to do it. I want my mom to be as proud of me as she was of him. " # Yes, she knows her	2	2	2
947	2	occasional pair of shoes or dress or shirt the children needed. # She was proud of her grandkids. They were doing well in school. She rewarded them with	2	2	2
948	2	always loved you, " she told him afterward. " Now I'm also proud of you. " # When Carrozzini looks at the fashion industry, he sees	2	2	2
949	2	. We've come a long way, we really have. I'm so proud of our players and how they've bought into what we said they've got	2	2	2
950	2	But the next generation, the country belongs to them. So I'm really proud of what they're doing. " 70556512 #	2	2	2
951	2	well, he sells tractors, just like my granddad, and I'm darn proud of that. " Udall's father, Morris " Mo " Udall, who	2	2	2
952	2	the clear glazes give it a distinctive handmade look. # " I'm very proud that you can mix and match all of them, which was part of my	2	2	2
953	2	the winning edge, " Oilers coach Jeff Fisher said. " " I was proud of the football team. These games are especially difficult. You prepare during the	2	2	2
954	2	It uses a unique character education curriculum that gets the kids focused, serious and proud about school life. # The three second-year schools referred to in the article as	2	2	2
[truncated: 508 more rows]

## Sheet: BCC-Blogs
seq	evaluator(1: first pair; 2: second pair)	content	A	B	final
[truncated: 1,512 more rows]

## Sheet: BCC-News
seq	evaluator(1: first pair; 2: second pair)	content	A	B	final
[truncated: 1,574 more rows]
